# Supplementary material for: Isolation, Structure Determination of Sesquiterpenes from Neurolaena lobata and Their Antiproliferative, Cell Cycle Arrest-Inducing and Anti-Invasive Properties against Human Cervical Tumor Cells
Source: MDPI journal article supplement (doi:10.3390/pharmaceutics13122088), 2021-12-05
Supplement: s1 [file s1]

# Supplementary Materials: Isolation, Structure Determination of Sesquiterpenes from *Neurolaena lobata* and Their Antiproliferative, Cell Cycle Arrest-Inducing and Anti-Invasive properties Against Human Cervical Tumor Cells

Andrea Vasas, Ildikó Lajter, Norbert Kúsz, Sándor B. Király, Tibor Kovács, Tibor Kurtán, Noémi Bózsity, Nikolett Nagy, Zsuzsanna Schelz, István Zupkó, Georg Krupitza, Richard Frisch, Attila Mándi, and Judit Hohmann

## TABLE OF CONTENTS

|                                                                                                                                                                                                                                                                                                                                                                                                                                                                                                                                                                                                                                                                                                                                                                                                                                                                                                                                                                                                                                                                                           |    |
|-------------------------------------------------------------------------------------------------------------------------------------------------------------------------------------------------------------------------------------------------------------------------------------------------------------------------------------------------------------------------------------------------------------------------------------------------------------------------------------------------------------------------------------------------------------------------------------------------------------------------------------------------------------------------------------------------------------------------------------------------------------------------------------------------------------------------------------------------------------------------------------------------------------------------------------------------------------------------------------------------------------------------------------------------------------------------------------------|----|
| Figure S1. <sup>1</sup> H NMR spectrum of 1 .....                                                                                                                                                                                                                                                                                                                                                                                                                                                                                                                                                                                                                                                                                                                                                                                                                                                                                                                                                                                                                                         | 4  |
| Figure S2. <sup>1</sup> H- <sup>1</sup> H COSY spectrum of 1 .....                                                                                                                                                                                                                                                                                                                                                                                                                                                                                                                                                                                                                                                                                                                                                                                                                                                                                                                                                                                                                        | 4  |
| Figure S3. NOESY spectrum of 1 .....                                                                                                                                                                                                                                                                                                                                                                                                                                                                                                                                                                                                                                                                                                                                                                                                                                                                                                                                                                                                                                                      | 5  |
| Figure S4. HRMS spectrum of 1 .....                                                                                                                                                                                                                                                                                                                                                                                                                                                                                                                                                                                                                                                                                                                                                                                                                                                                                                                                                                                                                                                       | 5  |
| Table S1. Comparison of the experimental <sup>13</sup> C NMR data of (4 <i>R</i> ,6 <i>R</i> ,7 <i>R</i> ,8 <i>S</i> ,9 <i>R</i> ,10 <i>R</i> )-1 with the computed values obtained at the 1: mPW1PW91/6-311+G(2d,p) // B3LYP/6-31+G(d,p) and the 2: mPW1PW91/6-311+G(2d,p) SMD/CDCl <sub>3</sub> // B3LYP/6-31+G(d,p) levels of theory.....                                                                                                                                                                                                                                                                                                                                                                                                                                                                                                                                                                                                                                                                                                                                              | 6  |
| Figure S5. <sup>1</sup> H NMR spectrum of 2.....                                                                                                                                                                                                                                                                                                                                                                                                                                                                                                                                                                                                                                                                                                                                                                                                                                                                                                                                                                                                                                          | 7  |
| Figure S6. <sup>1</sup> H- <sup>1</sup> H COSY spectrum of 2.....                                                                                                                                                                                                                                                                                                                                                                                                                                                                                                                                                                                                                                                                                                                                                                                                                                                                                                                                                                                                                         | 8  |
| Figure S7. HSQC spectrum of 2.....                                                                                                                                                                                                                                                                                                                                                                                                                                                                                                                                                                                                                                                                                                                                                                                                                                                                                                                                                                                                                                                        | 8  |
| Figure S8. HMBC spectrum of 2.....                                                                                                                                                                                                                                                                                                                                                                                                                                                                                                                                                                                                                                                                                                                                                                                                                                                                                                                                                                                                                                                        | 9  |
| Figure S9. HRMS spectrum of 2 .....                                                                                                                                                                                                                                                                                                                                                                                                                                                                                                                                                                                                                                                                                                                                                                                                                                                                                                                                                                                                                                                       | 9  |
| Table S2. Comparison of the experimental <sup>13</sup> C NMR data of all carbons of 2 with the mPW1PW91/6-311+G(2d,p) // B3LYP/6-31+G(d,p) ones of the 1: (4 <i>R</i> ,6 <i>R</i> ,7 <i>S</i> ,8 <i>S</i> ,9 <i>R</i> ,10 <i>R</i> ,11 <i>S</i> )-2, 2: (4 <i>R</i> ,6 <i>R</i> ,7 <i>S</i> ,8 <i>S</i> ,9 <i>R</i> ,10 <i>R</i> ,11 <i>R</i> )-3, 3: (4 <i>R</i> ,6 <i>R</i> ,7 <i>S</i> ,8 <i>R</i> ,9 <i>R</i> ,10 <i>R</i> ,11 <i>S</i> )-2, 4: (4 <i>R</i> ,6 <i>R</i> ,7 <i>S</i> ,8 <i>R</i> ,9 <i>R</i> ,10 <i>R</i> ,11 <i>R</i> )-2, 5: (4 <i>R</i> ,6 <i>R</i> ,7 <i>S</i> ,8 <i>R</i> ,9 <i>S</i> ,10 <i>R</i> ,11 <i>S</i> )-2, 6: (4 <i>R</i> ,6 <i>R</i> ,7 <i>S</i> ,8 <i>R</i> ,9 <i>S</i> ,10 <i>R</i> ,11 <i>R</i> )-2, 7: (4 <i>R</i> ,6 <i>R</i> ,7 <i>S</i> ,8 <i>S</i> ,9 <i>S</i> ,10 <i>R</i> ,11 <i>S</i> )-2 and the 8: (4 <i>R</i> ,6 <i>R</i> ,7 <i>S</i> ,8 <i>S</i> ,9 <i>S</i> ,10 <i>R</i> ,11 <i>R</i> )-2 stereoisomers. For better comparison, Δδ values over 2.5 were highlighted with yellow and those over 5.0 with red.....                       | 10 |
| Table S3. Comparison of the experimental <sup>13</sup> C NMR data of all carbons of 2 with the mPW1PW91/6-311+G(2d,p) SMD/CDCl <sub>3</sub> // B3LYP/6-31+G(d,p) ones of the 1: (4 <i>R</i> ,6 <i>R</i> ,7 <i>S</i> ,8 <i>S</i> ,9 <i>R</i> ,10 <i>R</i> ,11 <i>S</i> )-2, 2: (4 <i>R</i> ,6 <i>R</i> ,7 <i>S</i> ,8 <i>S</i> ,9 <i>R</i> ,10 <i>R</i> ,11 <i>R</i> )-2, 3: (4 <i>R</i> ,6 <i>R</i> ,7 <i>S</i> ,8 <i>R</i> ,9 <i>R</i> ,10 <i>R</i> ,11 <i>S</i> )-2, 4: (4 <i>R</i> ,6 <i>R</i> ,7 <i>S</i> ,8 <i>R</i> ,9 <i>R</i> ,10 <i>R</i> ,11 <i>R</i> )-2, 5: (4 <i>R</i> ,6 <i>R</i> ,7 <i>S</i> ,8 <i>R</i> ,9 <i>S</i> ,10 <i>R</i> ,11 <i>S</i> )-2, 6: (4 <i>R</i> ,6 <i>R</i> ,7 <i>S</i> ,8 <i>R</i> ,9 <i>S</i> ,10 <i>R</i> ,11 <i>R</i> )-2, 7: (4 <i>R</i> ,6 <i>R</i> ,7 <i>S</i> ,8 <i>S</i> ,9 <i>S</i> ,10 <i>R</i> ,11 <i>S</i> )-2 and the 8: (4 <i>R</i> ,6 <i>R</i> ,7 <i>S</i> ,8 <i>S</i> ,9 <i>S</i> ,10 <i>R</i> ,11 <i>R</i> )-2 stereoisomers. For better comparison, Δδ values over 2.5 were highlighted with yellow and those over 5.0 with red..... | 11 |
| Table S4. Boltzmann populations and optical rotations of the low-energy conformers of (4 <i>R</i> ,6 <i>R</i> ,7 <i>S</i> ,8 <i>S</i> ,9 <i>R</i> ,10 <i>R</i> ,11 <i>R</i> )-2 computed at various levels for the CAM-B3LYP/TZVP PCM/CHCl <sub>3</sub> re-optimized MMFF conformers.....                                                                                                                                                                                                                                                                                                                                                                                                                                                                                                                                                                                                                                                                                                                                                                                                 | 12 |
| Figure S10. <sup>1</sup> H NMR spectrum of 3.....                                                                                                                                                                                                                                                                                                                                                                                                                                                                                                                                                                                                                                                                                                                                                                                                                                                                                                                                                                                                                                         | 13 |

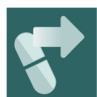

|                                                                                                                                                                                                                                                                                                                                                                                                                                                                                                                                                                                                                                                                                                                                                                                                                                                                                                                                                                                                                                                                                                       |    |
|-------------------------------------------------------------------------------------------------------------------------------------------------------------------------------------------------------------------------------------------------------------------------------------------------------------------------------------------------------------------------------------------------------------------------------------------------------------------------------------------------------------------------------------------------------------------------------------------------------------------------------------------------------------------------------------------------------------------------------------------------------------------------------------------------------------------------------------------------------------------------------------------------------------------------------------------------------------------------------------------------------------------------------------------------------------------------------------------------------|----|
| Figure S11. $^{13}\text{C}$ NMR spectrum of 3 .....                                                                                                                                                                                                                                                                                                                                                                                                                                                                                                                                                                                                                                                                                                                                                                                                                                                                                                                                                                                                                                                   | 13 |
| Figure S12. $^1\text{H}$ - $^1\text{H}$ COSY spectrum of 3 .....                                                                                                                                                                                                                                                                                                                                                                                                                                                                                                                                                                                                                                                                                                                                                                                                                                                                                                                                                                                                                                      | 14 |
| Figure S13. HSQC spectrum of 3 .....                                                                                                                                                                                                                                                                                                                                                                                                                                                                                                                                                                                                                                                                                                                                                                                                                                                                                                                                                                                                                                                                  | 14 |
| Figure S14. HMBC spectrum of 3 .....                                                                                                                                                                                                                                                                                                                                                                                                                                                                                                                                                                                                                                                                                                                                                                                                                                                                                                                                                                                                                                                                  | 15 |
| Figure S15. NOESY spectrum of 3 .....                                                                                                                                                                                                                                                                                                                                                                                                                                                                                                                                                                                                                                                                                                                                                                                                                                                                                                                                                                                                                                                                 | 15 |
| Figure S16. HRMS spectrum of 3 .....                                                                                                                                                                                                                                                                                                                                                                                                                                                                                                                                                                                                                                                                                                                                                                                                                                                                                                                                                                                                                                                                  | 16 |
| Figure S17. $^1\text{H}$ NMR spectrum of 4 .....                                                                                                                                                                                                                                                                                                                                                                                                                                                                                                                                                                                                                                                                                                                                                                                                                                                                                                                                                                                                                                                      | 16 |
| Figure S18. $^1\text{H}$ - $^1\text{H}$ COSY spectrum of 4 .....                                                                                                                                                                                                                                                                                                                                                                                                                                                                                                                                                                                                                                                                                                                                                                                                                                                                                                                                                                                                                                      | 17 |
| Figure S19. NOESY spectrum of 4 .....                                                                                                                                                                                                                                                                                                                                                                                                                                                                                                                                                                                                                                                                                                                                                                                                                                                                                                                                                                                                                                                                 | 17 |
| Figure S20. HRMS spectrum of 4 .....                                                                                                                                                                                                                                                                                                                                                                                                                                                                                                                                                                                                                                                                                                                                                                                                                                                                                                                                                                                                                                                                  | 18 |
| Figure S21. Overlapped geometries of the conformers of the two conformer groups of (6 <i>R</i> ,7 <i>S</i> ,8 <i>S</i> ,9 <i>R</i> ,10 <i>R</i> )-4. Group A: confs. A-F, I, J; group B: confs. G, H. Level of optimization: CAM-B3LYP/TZVP PCM/MeCN .....                                                                                                                                                                                                                                                                                                                                                                                                                                                                                                                                                                                                                                                                                                                                                                                                                                            | 18 |
| Figure S22. Comparison of the experimental ECD spectrum of 4 measured in MeCN with the CAM-B3LYP/TZVP PCM/MeCN spectra of conformers A and G of (6 <i>R</i> ,7 <i>S</i> ,8 <i>S</i> ,9 <i>R</i> ,10 <i>R</i> )-4, as the lowest-energy representatives of groups A and B. Level of optimization: CAM-B3LYP/TZVP PCM/MeCN. ....                                                                                                                                                                                                                                                                                                                                                                                                                                                                                                                                                                                                                                                                                                                                                                        | 19 |
| Figure S23. $^1\text{H}$ NMR spectrum of 5 .....                                                                                                                                                                                                                                                                                                                                                                                                                                                                                                                                                                                                                                                                                                                                                                                                                                                                                                                                                                                                                                                      | 19 |
| Figure S24. JMOD spectrum of 5 .....                                                                                                                                                                                                                                                                                                                                                                                                                                                                                                                                                                                                                                                                                                                                                                                                                                                                                                                                                                                                                                                                  | 20 |
| Figure S25. $^1\text{H}$ - $^1\text{H}$ COSY spectrum of 5 .....                                                                                                                                                                                                                                                                                                                                                                                                                                                                                                                                                                                                                                                                                                                                                                                                                                                                                                                                                                                                                                      | 20 |
| Figure S26. HSQC spectrum of 5 .....                                                                                                                                                                                                                                                                                                                                                                                                                                                                                                                                                                                                                                                                                                                                                                                                                                                                                                                                                                                                                                                                  | 21 |
| Figure S27. HMBC spectrum of 5 .....                                                                                                                                                                                                                                                                                                                                                                                                                                                                                                                                                                                                                                                                                                                                                                                                                                                                                                                                                                                                                                                                  | 22 |
| Figure S28. NOESY spectrum of 5 .....                                                                                                                                                                                                                                                                                                                                                                                                                                                                                                                                                                                                                                                                                                                                                                                                                                                                                                                                                                                                                                                                 | 22 |
| Figure S29. HRMS spectrum of 5 .....                                                                                                                                                                                                                                                                                                                                                                                                                                                                                                                                                                                                                                                                                                                                                                                                                                                                                                                                                                                                                                                                  | 22 |
| Table S5. Comparison of the experimental $^{13}\text{C}$ NMR data of all carbons of 5 with the mPW1PW91/6-311+G(2d,p) // B3LYP/6-31+G(d,p) ones of the 1: (4 <i>R</i> ,6 <i>R</i> ,7 <i>S</i> ,8 <i>S</i> ,9 <i>R</i> ,10 <i>R</i> ,11 <i>S</i> )-5, 2: (4 <i>R</i> ,6 <i>R</i> ,7 <i>S</i> ,8 <i>S</i> ,9 <i>R</i> ,10 <i>R</i> ,11 <i>R</i> )-5, 3: (4 <i>R</i> ,6 <i>R</i> ,7 <i>S</i> ,8 <i>R</i> ,9 <i>R</i> ,10 <i>R</i> ,11 <i>S</i> )-5, 4: (4 <i>R</i> ,6 <i>R</i> ,7 <i>S</i> ,8 <i>R</i> ,9 <i>R</i> ,10 <i>R</i> ,11 <i>R</i> )-5, 5: (4 <i>R</i> ,6 <i>R</i> ,7 <i>S</i> ,8 <i>R</i> ,9 <i>S</i> ,10 <i>R</i> ,11 <i>S</i> )-5, 6: (4 <i>R</i> ,6 <i>R</i> ,7 <i>S</i> ,8 <i>R</i> ,9 <i>S</i> ,10 <i>R</i> ,11 <i>R</i> )-5, 7: (4 <i>R</i> ,6 <i>R</i> ,7 <i>S</i> ,8 <i>S</i> ,9 <i>S</i> ,10 <i>R</i> ,11 <i>S</i> )-5 and the 8: (4 <i>R</i> ,6 <i>R</i> ,7 <i>S</i> ,8 <i>S</i> ,9 <i>S</i> ,10 <i>R</i> ,11 <i>R</i> )-5 stereoisomers. For better comparison, $\Delta\delta$ values over 2.5 were highlighted with yellow and those over 5.0 with red .....                      | 24 |
| Table S6. Comparison of the experimental $^{13}\text{C}$ NMR data of all carbons of 5 with the mPW1PW91/6-311+G(2d,p) SMD/ $\text{CDCl}_3$ // B3LYP/6-31+G(d,p) ones of the 1: (4 <i>R</i> ,6 <i>R</i> ,7 <i>S</i> ,8 <i>S</i> ,9 <i>R</i> ,10 <i>R</i> ,11 <i>S</i> )-5, 2: (4 <i>R</i> ,6 <i>R</i> ,7 <i>S</i> ,8 <i>S</i> ,9 <i>R</i> ,10 <i>R</i> ,11 <i>R</i> )-5, 3: (4 <i>R</i> ,6 <i>R</i> ,7 <i>S</i> ,8 <i>R</i> ,9 <i>R</i> ,10 <i>R</i> ,11 <i>S</i> )-5, 4: (4 <i>R</i> ,6 <i>R</i> ,7 <i>S</i> ,8 <i>R</i> ,9 <i>R</i> ,10 <i>R</i> ,11 <i>R</i> )-5, 5: (4 <i>R</i> ,6 <i>R</i> ,7 <i>S</i> ,8 <i>R</i> ,9 <i>S</i> ,10 <i>R</i> ,11 <i>S</i> )-5, 6: (4 <i>R</i> ,6 <i>R</i> ,7 <i>S</i> ,8 <i>R</i> ,9 <i>S</i> ,10 <i>R</i> ,11 <i>R</i> )-5, 7: (4 <i>R</i> ,6 <i>R</i> ,7 <i>S</i> ,8 <i>S</i> ,9 <i>S</i> ,10 <i>R</i> ,11 <i>S</i> )-5 and the 8: (4 <i>R</i> ,6 <i>R</i> ,7 <i>S</i> ,8 <i>S</i> ,9 <i>S</i> ,10 <i>R</i> ,11 <i>R</i> )-5 stereoisomers. For better comparison, $\Delta\delta$ values over 2.5 were highlighted with yellow and those over 5.0 with red ..... | 25 |
| Table S7. Comparison of the experimental $^1\text{H}$ NMR data of all hydrogens except for the OH hydrogen of 5 with the mPW1PW91/6-311+G(2d,p) // B3LYP/6-31+G(d,p) ones of the 1: (4 <i>R</i> ,6 <i>R</i> ,7 <i>S</i> ,8 <i>S</i> ,9 <i>R</i> ,10 <i>R</i> ,11 <i>S</i> )-5, 2: (4 <i>R</i> ,6 <i>R</i> ,7 <i>S</i> ,8 <i>S</i> ,9 <i>R</i> ,10 <i>R</i> ,11 <i>R</i> )-5, 3: (4 <i>R</i> ,6 <i>R</i> ,7 <i>S</i> ,8 <i>R</i> ,9 <i>R</i> ,10 <i>R</i> ,11 <i>S</i> )-5, 4: (4 <i>R</i> ,6 <i>R</i> ,7 <i>S</i> ,8 <i>R</i> ,9 <i>R</i> ,10 <i>R</i> ,11 <i>R</i> )-5, 5: (4 <i>R</i> ,6 <i>R</i> ,7 <i>S</i> ,8 <i>R</i> ,9 <i>S</i> ,10 <i>R</i> ,11 <i>S</i> )-5, 6: (4 <i>R</i> ,6 <i>R</i> ,7 <i>S</i> ,8 <i>R</i> ,9 <i>S</i> ,10 <i>R</i> ,11 <i>R</i> )-5, 7: (4 <i>R</i> ,6 <i>R</i> ,7 <i>S</i> ,8 <i>S</i> ,9 <i>S</i> ,10 <i>R</i> ,11 <i>S</i> )-5 and the 8: (4 <i>R</i> ,6 <i>R</i> ,7 <i>S</i> ,8 <i>S</i> ,9 <i>S</i> ,10 <i>R</i> ,11 <i>R</i> )-5 stereoisomers. Shielding constants related to the hydrogen atoms in the                                                        |    |



|                                                                                                                                                                                                                                                                                                                                                                                                                                                                                                                                                                                                                                                                                                                                                                                                                                                                                                                                                                                                                                                                                                      |    |
|------------------------------------------------------------------------------------------------------------------------------------------------------------------------------------------------------------------------------------------------------------------------------------------------------------------------------------------------------------------------------------------------------------------------------------------------------------------------------------------------------------------------------------------------------------------------------------------------------------------------------------------------------------------------------------------------------------------------------------------------------------------------------------------------------------------------------------------------------------------------------------------------------------------------------------------------------------------------------------------------------------------------------------------------------------------------------------------------------|----|
| methyl groups were averaged. For better comparison, $\Delta\delta$ values over 0.3 were highlighted with yellow and those over 0.6 with red.....                                                                                                                                                                                                                                                                                                                                                                                                                                                                                                                                                                                                                                                                                                                                                                                                                                                                                                                                                     | 26 |
| Table S8. Comparison of the experimental $^{13}\text{C}$ NMR data of all carbons of 5 with the mPW1PW91/6-311+G(2d,p) SMD/ $\text{CDCl}_3$ // B3LYP/6-31+G(d,p) ones of the 1: (4 <i>R</i> ,6 <i>R</i> ,7 <i>S</i> ,8 <i>S</i> ,9 <i>R</i> ,10 <i>R</i> ,11 <i>S</i> )-5, 2: (4 <i>R</i> ,6 <i>R</i> ,7 <i>S</i> ,8 <i>S</i> ,9 <i>R</i> ,10 <i>R</i> ,11 <i>R</i> )-5, 3: (4 <i>R</i> ,6 <i>R</i> ,7 <i>S</i> ,8 <i>R</i> ,9 <i>R</i> ,10 <i>R</i> ,11 <i>S</i> )-5, 4: (4 <i>R</i> ,6 <i>R</i> ,7 <i>S</i> ,8 <i>R</i> ,9 <i>R</i> ,10 <i>R</i> ,11 <i>R</i> )-5, 5: (4 <i>R</i> ,6 <i>R</i> ,7 <i>S</i> ,8 <i>R</i> ,9 <i>S</i> ,10 <i>R</i> ,11 <i>S</i> )-5, 6: (4 <i>R</i> ,6 <i>R</i> ,7 <i>S</i> ,8 <i>R</i> ,9 <i>S</i> ,10 <i>R</i> ,11 <i>R</i> )-5, 7: (4 <i>R</i> ,6 <i>R</i> ,7 <i>S</i> ,8 <i>S</i> ,9 <i>S</i> ,10 <i>R</i> ,11 <i>S</i> )-5 and the 8: (4 <i>R</i> ,6 <i>R</i> ,7 <i>S</i> ,8 <i>S</i> ,9 <i>S</i> ,10 <i>R</i> ,11 <i>R</i> )-5 stereoisomers. For better comparison, $\Delta\delta$ values over 2.5 were highlighted with yellow and those over 5.0 with red..... | 28 |
| Figure S30. $^1\text{H}$ NMR spectrum of 6.....                                                                                                                                                                                                                                                                                                                                                                                                                                                                                                                                                                                                                                                                                                                                                                                                                                                                                                                                                                                                                                                      | 29 |
| Figure S31. $^{13}\text{C}$ NMR spectrum of 6 .....                                                                                                                                                                                                                                                                                                                                                                                                                                                                                                                                                                                                                                                                                                                                                                                                                                                                                                                                                                                                                                                  | 30 |
| Figure S32. $^1\text{H}$ - $^1\text{H}$ COSY spectrum of 6 .....                                                                                                                                                                                                                                                                                                                                                                                                                                                                                                                                                                                                                                                                                                                                                                                                                                                                                                                                                                                                                                     | 30 |
| Figure S33. HSQC spectrum of 6.....                                                                                                                                                                                                                                                                                                                                                                                                                                                                                                                                                                                                                                                                                                                                                                                                                                                                                                                                                                                                                                                                  | 31 |
| Figure S34. HMBC spectrum of 6.....                                                                                                                                                                                                                                                                                                                                                                                                                                                                                                                                                                                                                                                                                                                                                                                                                                                                                                                                                                                                                                                                  | 31 |
| Figure S35. NOESY spectrum of 6 .....                                                                                                                                                                                                                                                                                                                                                                                                                                                                                                                                                                                                                                                                                                                                                                                                                                                                                                                                                                                                                                                                | 32 |
| Figure S36. HRMS spectrum of 6 .....                                                                                                                                                                                                                                                                                                                                                                                                                                                                                                                                                                                                                                                                                                                                                                                                                                                                                                                                                                                                                                                                 | 32 |
| Figure S37. $^1\text{H}$ NMR spectrum of 7.....                                                                                                                                                                                                                                                                                                                                                                                                                                                                                                                                                                                                                                                                                                                                                                                                                                                                                                                                                                                                                                                      | 33 |
| Figure S38. JMOD spectrum of 7.....                                                                                                                                                                                                                                                                                                                                                                                                                                                                                                                                                                                                                                                                                                                                                                                                                                                                                                                                                                                                                                                                  | 33 |
| Figure S39. HSQC spectrum of 7.....                                                                                                                                                                                                                                                                                                                                                                                                                                                                                                                                                                                                                                                                                                                                                                                                                                                                                                                                                                                                                                                                  | 34 |
| Figure S40. HMBC spectrum of 7.....                                                                                                                                                                                                                                                                                                                                                                                                                                                                                                                                                                                                                                                                                                                                                                                                                                                                                                                                                                                                                                                                  | 34 |
| Figure S41. $^1\text{H}$ NMR spectrum of 8.....                                                                                                                                                                                                                                                                                                                                                                                                                                                                                                                                                                                                                                                                                                                                                                                                                                                                                                                                                                                                                                                      | 35 |
| Figure S42. JMOD spectrum of 8.....                                                                                                                                                                                                                                                                                                                                                                                                                                                                                                                                                                                                                                                                                                                                                                                                                                                                                                                                                                                                                                                                  | 36 |
| Figure S43. $^1\text{H}$ - $^1\text{H}$ COSY spectrum of 8.....                                                                                                                                                                                                                                                                                                                                                                                                                                                                                                                                                                                                                                                                                                                                                                                                                                                                                                                                                                                                                                      | 36 |
| Figure S44. HSQC spectrum of 8.....                                                                                                                                                                                                                                                                                                                                                                                                                                                                                                                                                                                                                                                                                                                                                                                                                                                                                                                                                                                                                                                                  | 37 |
| Figure S45. HMBC spectrum of 8.....                                                                                                                                                                                                                                                                                                                                                                                                                                                                                                                                                                                                                                                                                                                                                                                                                                                                                                                                                                                                                                                                  | 38 |
| Figure S46. HRMS spectrum of 8 .....                                                                                                                                                                                                                                                                                                                                                                                                                                                                                                                                                                                                                                                                                                                                                                                                                                                                                                                                                                                                                                                                 | 38 |
| Figure S47. $^1\text{H}$ NMR spectrum of 9.....                                                                                                                                                                                                                                                                                                                                                                                                                                                                                                                                                                                                                                                                                                                                                                                                                                                                                                                                                                                                                                                      | 38 |
| Figure S48. $^1\text{H}$ - $^1\text{H}$ COSY spectrum of 9.....                                                                                                                                                                                                                                                                                                                                                                                                                                                                                                                                                                                                                                                                                                                                                                                                                                                                                                                                                                                                                                      | 39 |
| Figure S49. HSQC spectrum of 9.....                                                                                                                                                                                                                                                                                                                                                                                                                                                                                                                                                                                                                                                                                                                                                                                                                                                                                                                                                                                                                                                                  | 40 |
| Figure S50. HMBC spectrum of 9.....                                                                                                                                                                                                                                                                                                                                                                                                                                                                                                                                                                                                                                                                                                                                                                                                                                                                                                                                                                                                                                                                  | 41 |
| Figure S51. NOESY spectrum of 9 .....                                                                                                                                                                                                                                                                                                                                                                                                                                                                                                                                                                                                                                                                                                                                                                                                                                                                                                                                                                                                                                                                | 41 |
| Figure S52. $^1\text{H}$ NMR spectrum of 10.....                                                                                                                                                                                                                                                                                                                                                                                                                                                                                                                                                                                                                                                                                                                                                                                                                                                                                                                                                                                                                                                     | 42 |
| Figure S53. JMOD spectrum of 10.....                                                                                                                                                                                                                                                                                                                                                                                                                                                                                                                                                                                                                                                                                                                                                                                                                                                                                                                                                                                                                                                                 | 42 |
| Figure S54. HSQC spectrum of 10.....                                                                                                                                                                                                                                                                                                                                                                                                                                                                                                                                                                                                                                                                                                                                                                                                                                                                                                                                                                                                                                                                 | 43 |
| Figure S55. HMBC spectrum of 10.....                                                                                                                                                                                                                                                                                                                                                                                                                                                                                                                                                                                                                                                                                                                                                                                                                                                                                                                                                                                                                                                                 | 43 |

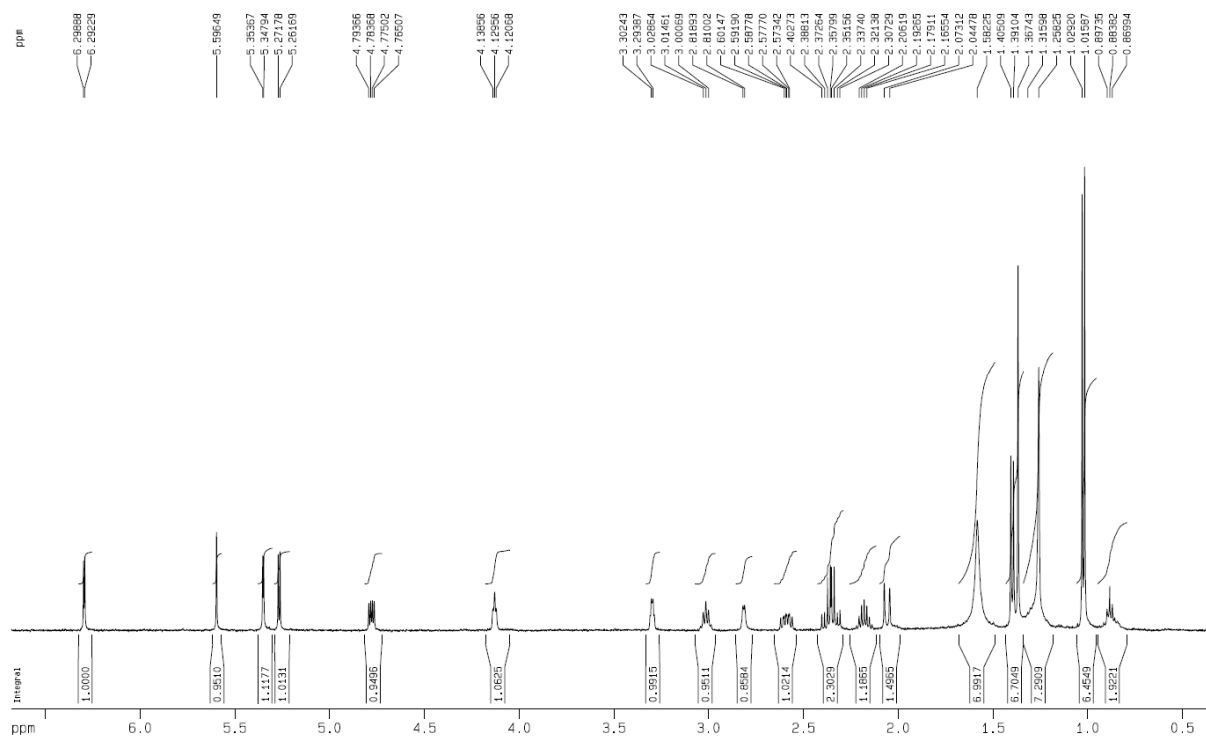

Figure S1.  $^1\text{H}$  NMR spectrum of 1

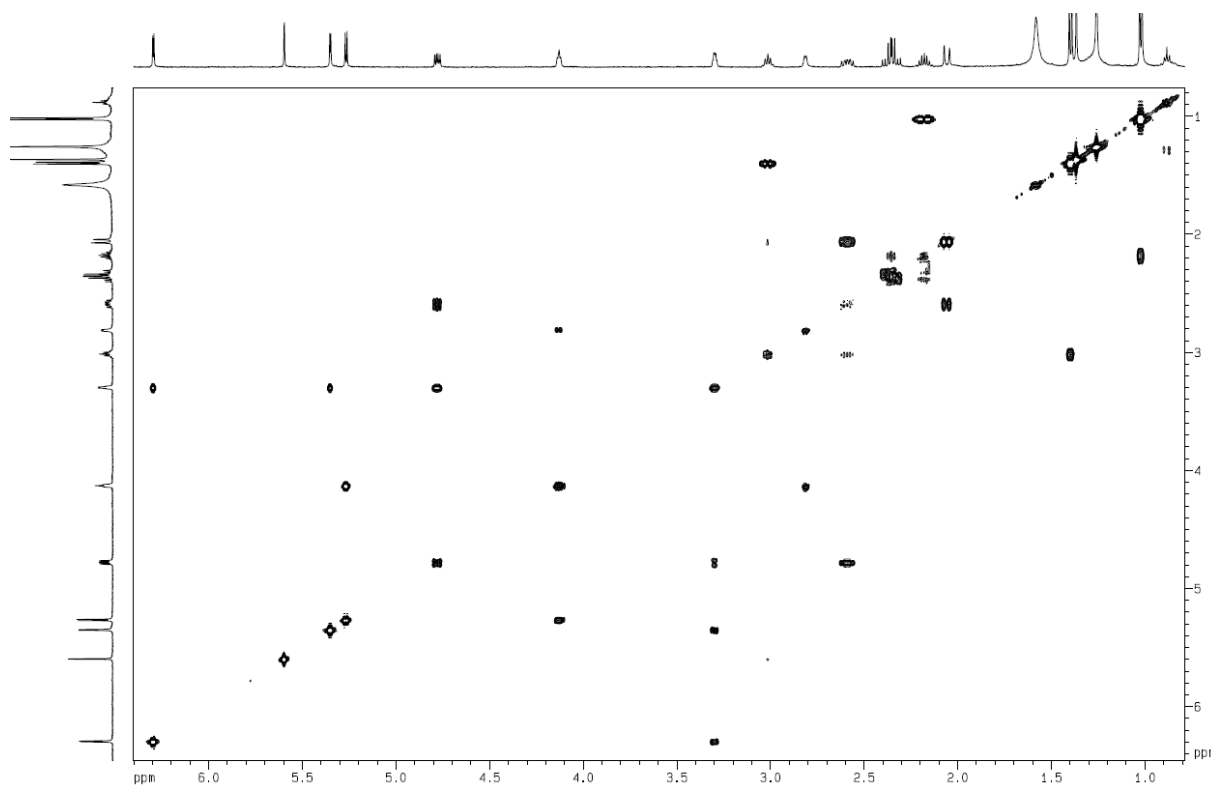

Figure S2.  $^1\text{H}$ - $^1\text{H}$  COSY spectrum of 1

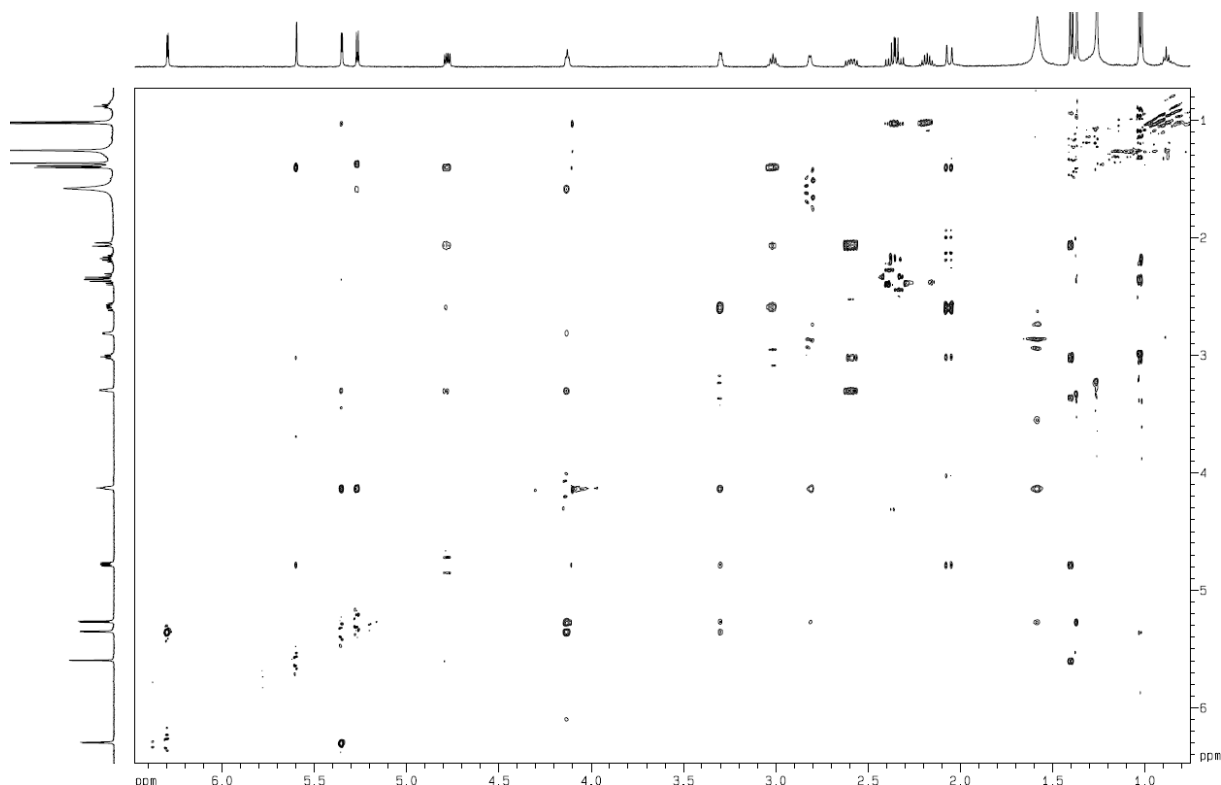

**Figure S3.** NOESY spectrum of **1**

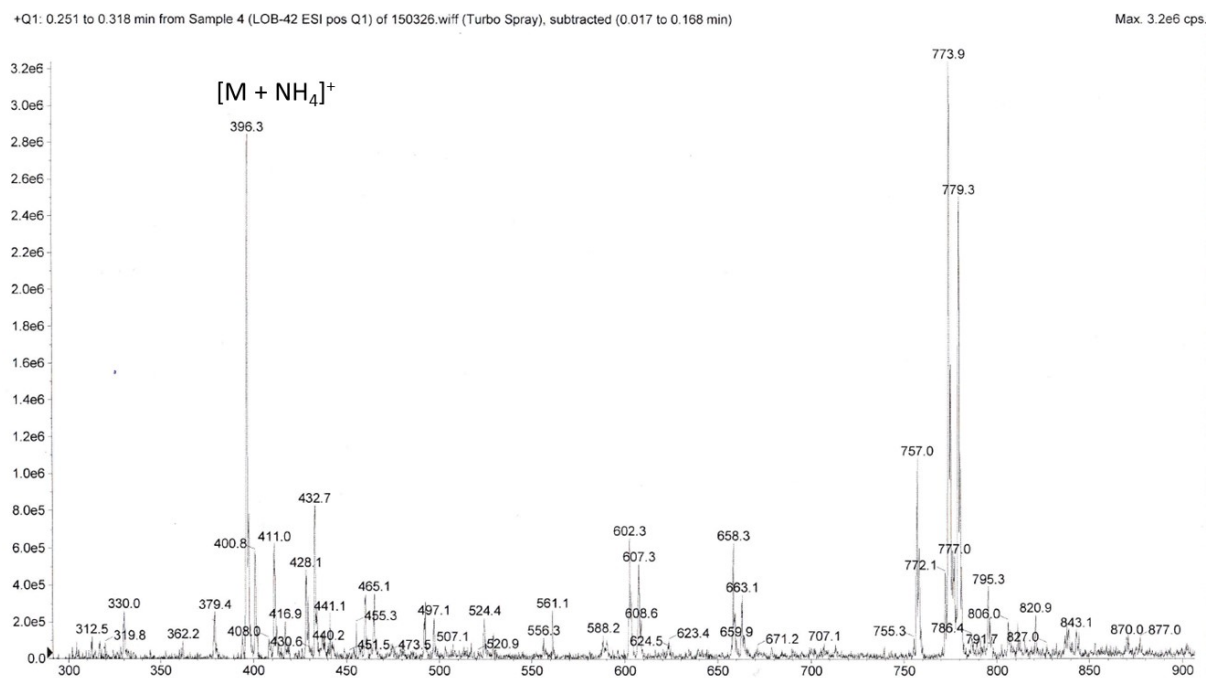

**Figure S4.** HRMS spectrum of **1**

**Table S1.** Comparison of the experimental  $^{13}\text{C}$  NMR data of (4*R*,6*R*,7*R*,8*S*,9*R*,10*R*)-**1** with the computed values obtained at the 1: mPW1PW91/6-311+G(2d,p) // B3LYP/6-31+G(d,p) and the 2: mPW1PW91/6-311+G(2d,p) SMD/ $\text{CDCl}_3$  // B3LYP/6-31+G(d,p) levels of theory.

| Numbering | Experimental | $\delta_1$ | $\delta_2$ | $\Delta\delta_1$ | $\Delta\delta_2$ |
|-----------|--------------|------------|------------|------------------|------------------|
| C-1       | 203.9        | 200.86     | 200.33     | 3.04             | 3.57             |
| C-2       | 104.0        | 104.35     | 102.83     | 0.35             | 1.17             |
| C-3       | 192.8        | 194.32     | 193.79     | 1.52             | 0.99             |
| C-4       | 31.5         | 34.63      | 35.02      | 3.13             | 3.52             |
| C-5       | 40.7         | 41.76      | 41.46      | 1.06             | 0.76             |
| C-6       | 75.3         | 71.75      | 72.50      | 3.55             | 2.80             |
| C-7       | 47.9         | 49.38      | 49.30      | 1.48             | 1.40             |
| C-8       | 73.8         | 77.49      | 76.62      | 3.69             | 2.82             |
| C-9       | 77.1         | 78.37      | 77.64      | 1.27             | 0.54             |
| C-10      | 88.9         | 89.93      | 89.91      | 1.03             | 1.01             |
| C-11      | 141.3        | 146.18     | 143.88     | 4.88             | 2.58             |
| C-12      | 169.2        | 167.14     | 167.51     | 2.06             | 1.69             |
| C-13      | 122.6        | 123.08     | 124.21     | 0.48             | 1.61             |
| C-14      | 18.9         | 17.83      | 17.97      | 1.07             | 0.93             |
| C-15      | 16.1         | 14.43      | 14.54      | 1.67             | 1.56             |
| C-1'      | 171.5        | 173.21     | 172.46     | 1.71             | 0.96             |
| C-2'      | 43.1         | 42.36      | 42.32      | 0.74             | 0.78             |
| C-3'      | 25.7         | 27.67      | 28.39      | 1.97             | 2.69             |
| C-4'      | 22.4         | 20.55      | 20.38      | 1.85             | 2.02             |
| C-5'      | 22.4         | 20.53      | 20.41      | 1.87             | 1.99             |
| CMAE      |              |            |            | 1.92             | 1.77             |

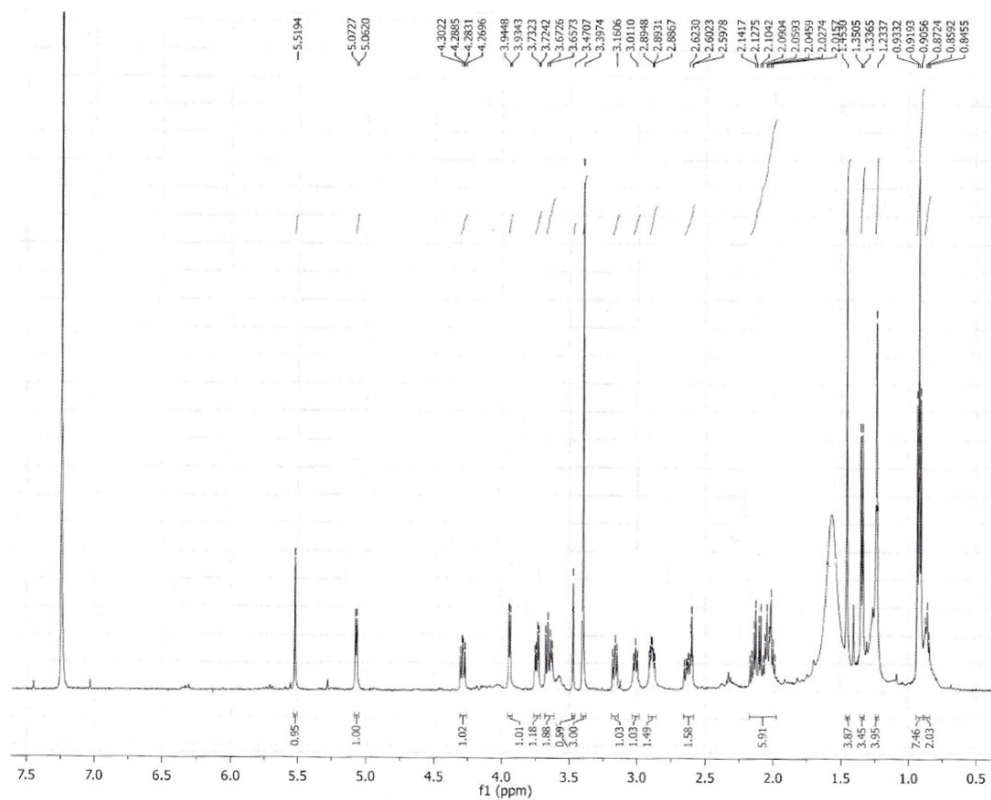

**Figure S5.**  $^1\text{H}$  NMR spectrum of **2**

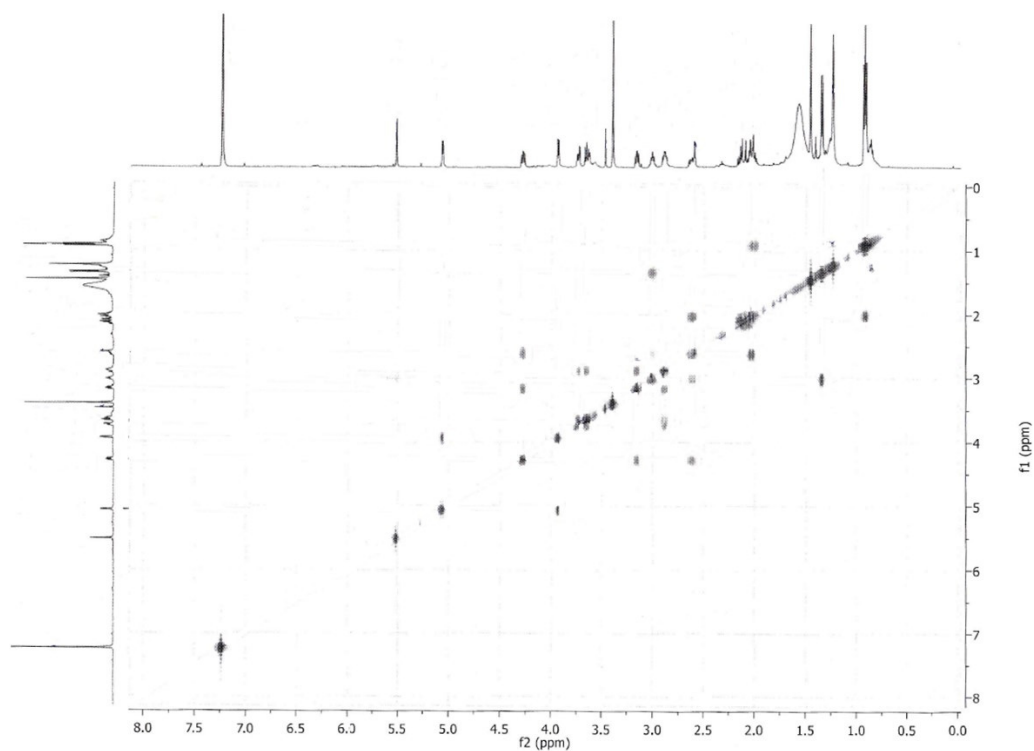

**Figure S6.**  $^1\text{H}$ - $^1\text{H}$  COSY spectrum of **2**

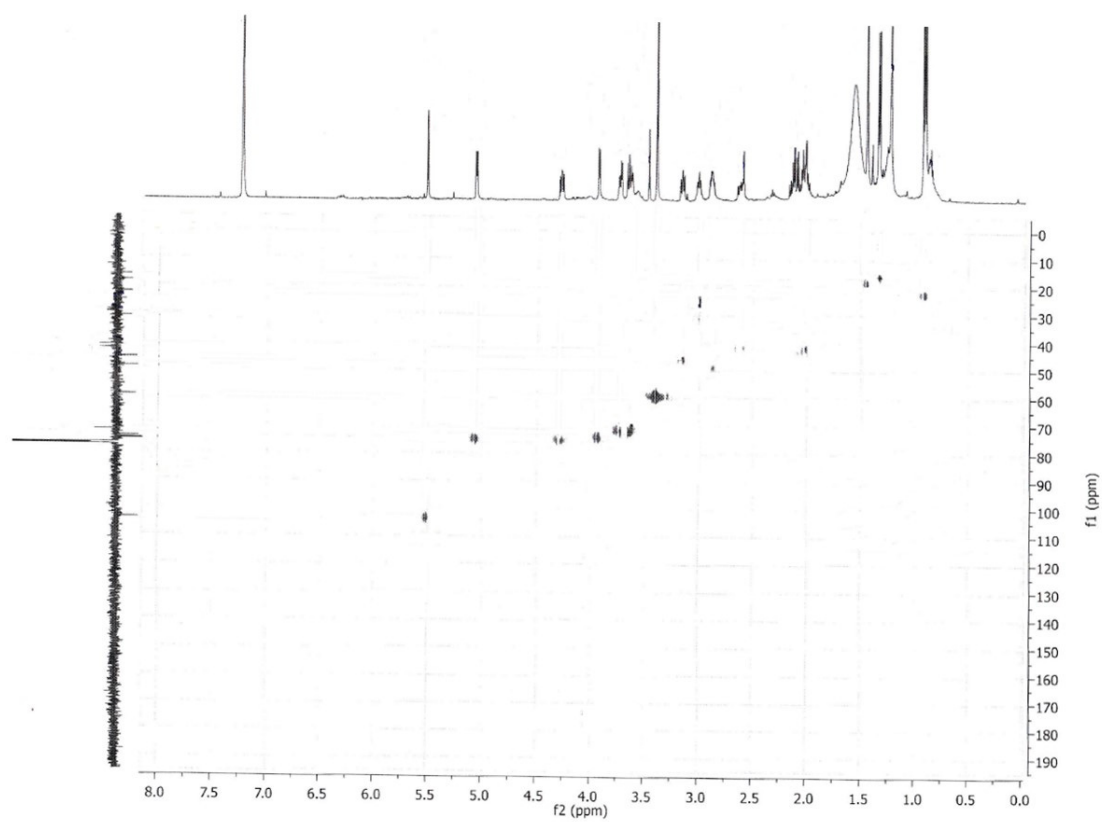

**Figure S7.** HSQC spectrum of **2**



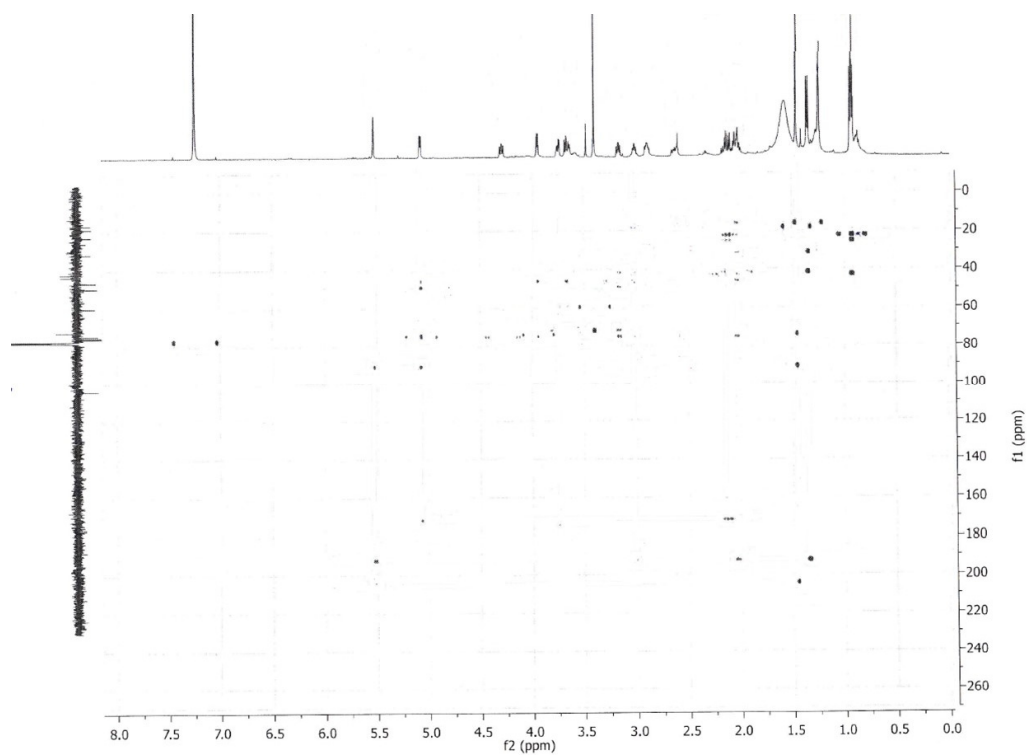

**Figure S8.** HMBC spectrum of **2**

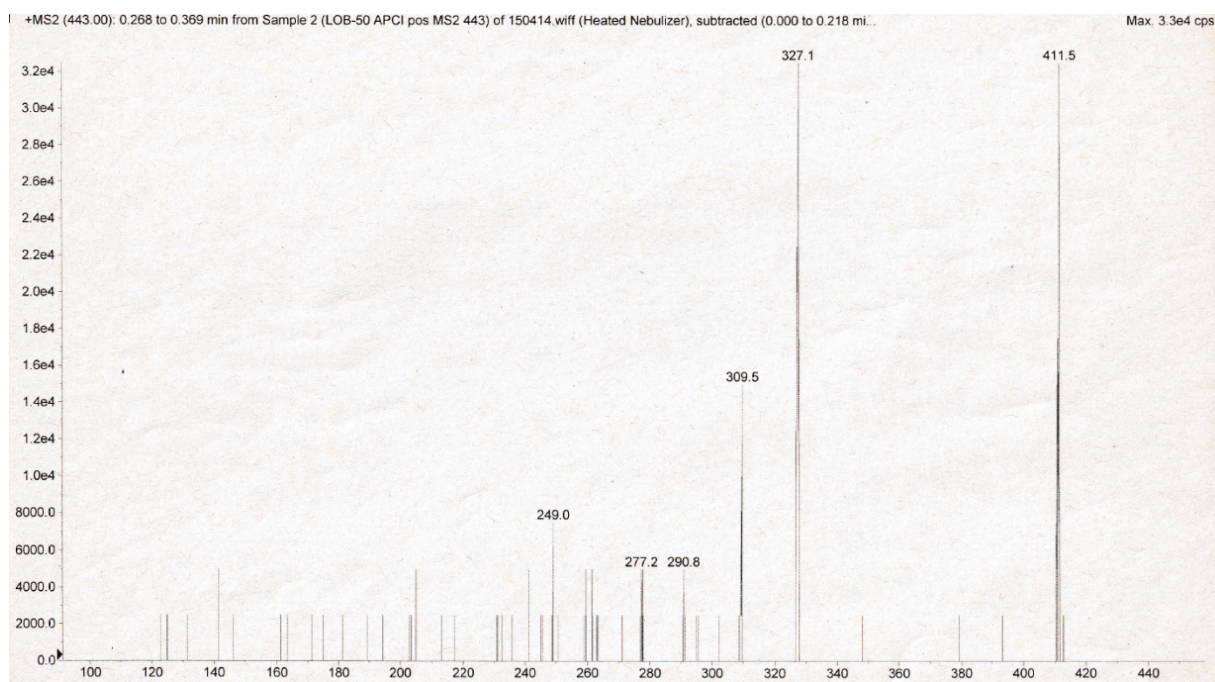

**Figure S9.** HRMS spectrum of **2**

**Table S2.** Comparison of the experimental  $^{13}\text{C}$  NMR data of all carbons of **2** with the mPW1PW91/6-311+G(2d,p) // B3LYP/6-31+G(d,p) ones of the 1: (4R,6R,7S,8S,9R,10R,11S)-**2**, 2: (4R,6R,7S,8S,9R,10R,11R)-**3**, 3: (4R,6R,7S,8R,9R,10R,11S)-**2**, 4: (4R,6R,7S,8R,9R,10R,11R)-**2**, 5: (4R,6R,7S,8R,9S,10R,11S)-**2**, 6: (4R,6R,7S,8R,9S,10R,11R)-**2**, 7: (4R,6R,7S,8S,9S,10R,11S)-**2** and the 8: (4R,6R,7S,8S,9S,10R,11R)-**2** stereoisomers. For better comparison,  $\Delta\delta$  values over 2.5 were highlighted with yellow and those over 5.0 with red.

| Numbering  | Exp   | Calc <sub>1</sub> | Calc <sub>2</sub> | Calc <sub>3</sub> | Calc <sub>4</sub> | Calc <sub>5</sub> | Calc <sub>6</sub> | Calc <sub>7</sub> | Calc <sub>8</sub> | $\Delta\delta_1$ | $\Delta\delta_2$ | $\Delta\delta_3$ | $\Delta\delta_4$ | $\Delta\delta_5$ | $\Delta\delta_6$ | $\Delta\delta_7$ | $\Delta\delta_8$ |
|------------|-------|-------------------|-------------------|-------------------|-------------------|-------------------|-------------------|-------------------|-------------------|------------------|------------------|------------------|------------------|------------------|------------------|------------------|------------------|
| C-1        | 204.2 | 201.54            | 201.62            | 201.79            | 201.35            | 203.73            | 204.08            | 205.94            | 206.04            | 2.66             | 2.58             | 2.41             | 2.85             | 0.47             | 0.12             | 1.74             | 1.84             |
| C-2        | 103.8 | 104.99            | 104.42            | 105.79            | 105.12            | 104.20            | 105.40            | 104.28            | 103.78            | 1.19             | 0.62             | 1.99             | 1.32             | 0.40             | 1.60             | 0.48             | 0.02             |
| C-3        | 192.4 | 192.77            | 192.52            | 195.04            | 195.47            | 198.80            | 197.37            | 195.15            | 195.46            | 0.37             | 0.12             | 2.64             | 3.07             | 6.40             | 4.97             | 2.75             | 3.06             |
| C-4        | 31.4  | 33.75             | 34.07             | 34.20             | 34.48             | 34.53             | 34.42             | 34.66             | 34.73             | 2.35             | 2.67             | 2.80             | 3.08             | 3.13             | 3.02             | 3.26             | 3.33             |
| C-5        | 41.7  | 39.70             | 42.36             | 41.39             | 42.10             | 40.94             | 41.56             | 40.92             | 42.63             | 2.00             | 0.66             | 0.31             | 0.40             | 0.76             | 0.14             | 0.78             | 0.93             |
| C-6        | 75.4  | 74.19             | 74.62             | 80.90             | 78.97             | 79.84             | 78.82             | 72.99             | 72.80             | 1.21             | 0.78             | 5.50             | 3.57             | 4.44             | 3.42             | 2.41             | 2.60             |
| C-7        | 46.1  | 42.87             | 48.87             | 42.81             | 49.80             | 48.22             | 47.74             | 47.58             | 49.11             | 3.23             | 2.77             | 3.29             | 3.70             | 2.12             | 1.64             | 1.48             | 3.01             |
| C-8        | 75.1  | 65.93             | 73.85             | 78.73             | 73.81             | 71.43             | 70.43             | 70.73             | 77.50             | 9.17             | 1.25             | 3.63             | 1.29             | 3.67             | 4.67             | 4.37             | 2.40             |
| C-9        | 74.3  | 75.33             | 75.47             | 77.51             | 77.62             | 79.07             | 79.03             | 81.64             | 81.01             | 1.03             | 1.17             | 3.21             | 3.32             | 4.77             | 4.73             | 7.34             | 6.71             |
| C-10       | 90.7  | 94.21             | 93.09             | 95.68             | 95.31             | 89.18             | 89.56             | 89.18             | 87.52             | 3.51             | 2.39             | 4.98             | 4.61             | 1.52             | 1.14             | 1.52             | 3.18             |
| C-11       | 49.3  | 43.31             | 49.27             | 43.56             | 44.27             | 47.56             | 45.36             | 43.85             | 49.20             | 5.99             | 0.03             | 5.74             | 5.03             | 1.74             | 3.94             | 5.45             | 0.10             |
| C-12       | 174.2 | 173.62            | 172.26            | 173.53            | 173.03            | 175.06            | 174.27            | 173.78            | 173.60            | 0.58             | 1.94             | 0.67             | 1.17             | 0.86             | 0.07             | 0.42             | 0.60             |
| C-13       | 72.1  | 68.45             | 74.76             | 68.98             | 74.76             | 70.63             | 67.97             | 67.58             | 69.12             | 3.65             | 2.66             | 3.12             | 2.66             | 1.47             | 4.13             | 4.52             | 2.98             |
| C-14       | 18.4  | 17.24             | 16.74             | 15.52             | 15.25             | 19.61             | 19.28             | 21.22             | 20.36             | 1.16             | 1.66             | 2.88             | 3.15             | 1.21             | 0.88             | 2.82             | 1.96             |
| C-15       | 16.0  | 15.65             | 14.65             | 15.45             | 14.83             | 15.22             | 14.53             | 15.28             | 14.25             | 0.35             | 1.35             | 0.55             | 1.17             | 0.78             | 1.47             | 0.72             | 1.75             |
| OMe        | 59.6  | 57.07             | 57.21             | 56.58             | 56.88             | 56.75             | 56.70             | 56.77             | 56.77             | 2.53             | 2.39             | 3.02             | 2.72             | 2.85             | 2.90             | 2.83             | 2.83             |
| ival CO 1' | 171.7 | 173.57            | 173.69            | 174.08            | 174.39            | 173.60            | 173.12            | 173.35            | 174.60            | 1.87             | 1.99             | 2.38             | 2.69             | 1.90             | 1.42             | 1.65             | 2.90             |
| C-2'       | 43.0  | 41.88             | 41.94             | 42.77             | 42.52             | 42.35             | 42.27             | 42.20             | 42.00             | 1.12             | 1.06             | 0.23             | 0.48             | 0.65             | 0.73             | 0.80             | 1.00             |
| C-3'       | 25.6  | 27.05             | 27.03             | 27.85             | 27.94             | 26.97             | 27.43             | 27.58             | 27.51             | 1.45             | 1.43             | 2.25             | 2.34             | 1.37             | 1.83             | 1.98             | 1.91             |
| C-4'       | 22.5  | 20.32             | 20.23             | 20.33             | 20.35             | 20.38             | 20.36             | 20.48             | 20.31             | 2.18             | 2.27             | 2.17             | 2.15             | 2.12             | 2.14             | 2.02             | 2.19             |
| C-5'       | 22.6  | 20.54             | 20.63             | 20.56             | 20.63             | 20.87             | 20.92             | 20.61             | 20.54             | 2.06             | 1.97             | 2.04             | 1.97             | 1.73             | 1.68             | 1.99             | 2.06             |
| CMAE       | N/A   | N/A               | N/A               | N/A               | N/A               | N/A               | N/A               | N/A               | N/A               | 2.36             | 1.61             | 2.66             | 2.51             | 2.11             | 2.22             | 2.44             | 2.25             |

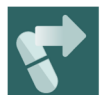

**Table S3.** Comparison of the experimental  $^{13}\text{C}$  NMR data of all carbons of **2** with the mPW1PW91/6-311+G(2d,p) SMD/ $\text{CDCl}_3$  // B3LYP/6-31+G(d,p) ones of the 1: (4*R*,6*R*,7*S*,8*S*,9*R*,10*R*,11*S*)-**2**, 2: (4*R*,6*R*,7*S*,8*S*,9*R*,10*R*,11*R*)-**2**, 3: (4*R*,6*R*,7*S*,8*R*,9*R*,10*R*,11*S*)-**2**, 4: (4*R*,6*R*,7*S*,8*R*,9*R*,10*R*,11*R*)-**2**, 5: (4*R*,6*R*,7*S*,8*R*,9*S*,10*R*,11*S*)-**2**, 6: (4*R*,6*R*,7*S*,8*R*,9*S*,10*R*,11*R*)-**2**, 7: (4*R*,6*R*,7*S*,8*S*,9*S*,10*R*,11*S*)-**2** and the 8: (4*R*,6*R*,7*S*,8*S*,9*S*,10*R*,11*R*)-**2** stereoisomers. For better comparison,  $\Delta\delta$  values over 2.5 were highlighted with yellow and those over 5.0 with red.

| Numbering  | Exp   | Calc <sub>1</sub> | Calc <sub>2</sub> | Calc <sub>3</sub> | Calc <sub>4</sub> | Calc <sub>5</sub> | Calc <sub>6</sub> | Calc <sub>7</sub> | Calc <sub>8</sub> | $\Delta\delta_1$ | $\Delta\delta_2$ | $\Delta\delta_3$ | $\Delta\delta_4$ | $\Delta\delta_5$ | $\Delta\delta_6$ | $\Delta\delta_7$ | $\Delta\delta_8$ |
|------------|-------|-------------------|-------------------|-------------------|-------------------|-------------------|-------------------|-------------------|-------------------|------------------|------------------|------------------|------------------|------------------|------------------|------------------|------------------|
| C-1        | 204.2 | 200.35            | 200.74            | 201.00            | 200.59            | 203.05            | 203.20            | 204.69            | 204.76            | 3.85             | 3.46             | 3.20             | 3.61             | 1.15             | 1.00             | 0.49             | 0.56             |
| C-2        | 103.8 | 103.37            | 102.85            | 104.24            | 103.66            | 102.91            | 103.99            | 103.02            | 102.39            | 0.43             | 0.95             | 0.44             | 0.14             | 0.89             | 0.19             | 0.78             | 1.41             |
| C-3        | 192.4 | 192.36            | 192.53            | 195.36            | 195.14            | 198.71            | 197.18            | 194.70            | 194.88            | 0.04             | 0.13             | 2.96             | 2.74             | 6.31             | 4.78             | 2.30             | 2.48             |
| C-4        | 31.4  | 34.38             | 34.71             | 34.76             | 35.08             | 35.19             | 35.04             | 35.26             | 35.23             | 2.98             | 3.31             | 3.36             | 3.68             | 3.79             | 3.64             | 3.86             | 3.83             |
| C-5        | 41.7  | 39.41             | 41.90             | 40.89             | 41.74             | 40.80             | 41.55             | 40.71             | 42.55             | 2.29             | 0.20             | 0.81             | 0.04             | 0.90             | 0.15             | 0.99             | 0.85             |
| C-6        | 75.4  | 74.69             | 74.75             | 81.54             | 79.22             | 80.34             | 79.01             | 73.65             | 73.34             | 0.71             | 0.65             | 6.14             | 3.82             | 4.94             | 3.61             | 1.75             | 2.06             |
| C-7        | 46.1  | 42.84             | 48.73             | 42.52             | 49.47             | 47.72             | 47.72             | 47.22             | 48.88             | 3.26             | 2.63             | 3.58             | 3.37             | 1.62             | 1.62             | 1.12             | 2.78             |
| C-8        | 75.1  | 65.59             | 73.23             | 78.07             | 73.70             | 71.08             | 70.12             | 70.63             | 76.98             | 9.51             | 1.87             | 2.97             | 1.40             | 4.02             | 4.98             | 4.47             | 1.88             |
| C-9        | 74.3  | 74.75             | 74.95             | 77.48             | 77.32             | 77.98             | 77.85             | 80.54             | 79.90             | 0.45             | 0.65             | 3.18             | 3.02             | 3.68             | 3.55             | 6.24             | 5.60             |
| C-10       | 90.7  | 93.89             | 92.47             | 94.81             | 94.26             | 88.79             | 89.06             | 88.53             | 87.25             | 3.19             | 1.77             | 4.11             | 3.56             | 1.91             | 1.64             | 2.17             | 3.45             |
| C-11       | 49.3  | 43.62             | 49.58             | 43.57             | 44.90             | 48.06             | 45.82             | 44.09             | 49.71             | 5.68             | 0.28             | 5.73             | 4.40             | 1.24             | 3.48             | 5.21             | 0.41             |
| C-12       | 174.2 | 174.40            | 173.03            | 174.39            | 173.82            | 176.34            | 175.36            | 174.64            | 174.69            | 0.20             | 1.17             | 0.19             | 0.38             | 2.14             | 1.16             | 0.44             | 0.49             |
| C-13       | 72.1  | 67.58             | 73.51             | 67.81             | 73.57             | 70.19             | 67.33             | 67.09             | 68.31             | 4.52             | 1.41             | 4.29             | 1.47             | 1.91             | 4.77             | 5.01             | 3.79             |
| C-14       | 18.4  | 17.27             | 16.76             | 15.42             | 15.08             | 19.49             | 19.08             | 21.02             | 20.40             | 1.13             | 1.64             | 2.98             | 3.32             | 1.09             | 0.68             | 2.62             | 2.00             |
| C-15       | 16.0  | 15.71             | 14.66             | 15.55             | 14.90             | 15.21             | 14.55             | 15.36             | 14.32             | 0.29             | 1.34             | 0.45             | 1.10             | 0.79             | 1.45             | 0.64             | 1.68             |
| OMe        | 59.6  | 56.78             | 56.88             | 56.20             | 56.53             | 56.25             | 56.22             | 56.39             | 56.31             | 2.82             | 2.72             | 3.40             | 3.07             | 3.35             | 3.38             | 3.21             | 3.29             |
| ival CO 1' | 171.7 | 172.33            | 172.72            | 173.17            | 173.28            | 172.74            | 172.53            | 172.57            | 173.68            | 0.63             | 1.02             | 1.47             | 1.58             | 1.04             | 0.83             | 0.87             | 1.98             |
| C-2'       | 43.0  | 42.02             | 42.08             | 42.66             | 42.59             | 42.39             | 42.24             | 42.23             | 42.04             | 0.98             | 0.92             | 0.34             | 0.41             | 0.61             | 0.76             | 0.77             | 0.96             |
| C-3'       | 25.6  | 27.54             | 27.79             | 28.40             | 28.72             | 27.53             | 27.85             | 27.98             | 28.33             | 1.94             | 2.19             | 2.80             | 3.12             | 1.93             | 2.25             | 2.38             | 2.73             |
| C-4'       | 22.50 | 20.04             | 19.94             | 20.13             | 20.20             | 20.11             | 20.10             | 20.21             | 20.13             | 2.46             | 2.56             | 2.37             | 2.30             | 2.39             | 2.40             | 2.29             | 2.37             |
| C-5'       | 22.60 | 20.33             | 20.34             | 20.38             | 20.48             | 20.63             | 20.60             | 20.35             | 20.38             | 2.27             | 2.26             | 2.22             | 2.12             | 1.97             | 2.00             | 2.25             | 2.22             |
| CMAE       | N/A   | N/A               | N/A               | N/A               | N/A               | N/A               | N/A               | N/A               | N/A               | 2.36             | 1.58             | 2.71             | 2.32             | 2.27             | 2.30             | 2.37             | 2.23             |

**Table S4.** Boltzmann populations and optical rotations of the low-energy conformers of (4*R*,6*R*,7*S*,8*S*,9*R*,10*R*,11*R*)-**2** computed at various levels for the CAM-B3LYP/TZVP PCM/CHCl<sub>3</sub> re-optimized MMFF conformers.

| Conformer | Boltzmann population | B3LYP/TZVP | BH&HLYP/TZVP | CAM-B3LYP/TZVP | PBE0/TZVP |
|-----------|----------------------|------------|--------------|----------------|-----------|
| Conf. A   | 18.86                | 66.71      | 47.37        | 58.29          | 66.55     |
| Conf. B   | 14.96                | 51.10      | 39.86        | 44.73          | 53.86     |
| Conf. C   | 12.88                | 80.64      | 67.20        | 73.79          | 83.32     |
| Conf. D   | 10.89                | 89.08      | 69.33        | 80.58          | 89.80     |
| Conf. E   | 9.60                 | 28.53      | 22.21        | 25.67          | 31.50     |
| Conf. F   | 7.12                 | 89.35      | 67.22        | 80.06          | 89.12     |
| Conf. G   | 4.76                 | 74.94      | 60.92        | 69.08          | 76.70     |
| Conf. H   | 1.75                 | 84.33      | 66.09        | 72.93          | 86.39     |
| Conf. I   | 1.66                 | 101.92     | 75.56        | 88.23          | 100.99    |
| Conf. J   | 1.54                 | 112.86     | 92.27        | 101.06         | 114.56    |
| Conf. K   | 1.24                 | 89.46      | 67.74        | 79.36          | 89.30     |
| Conf. L   | 1.13                 | 58.77      | 45.01        | 50.65          | 60.59     |
| Conf. M   | 1.08                 | 69.29      | 56.44        | 62.80          | 71.66     |
| Conf. N   | 1.08                 | 70.05      | 56.54        | 62.34          | 73.22     |
| Conf. O   | 1.07                 | 50.92      | 44.93        | 49.75          | 53.26     |
| Conf. P   | 1.00                 | 126.30     | 99.34        | 112.50         | 126.35    |
| Conf. Q   | 0.94                 | 30.83      | 18.37        | 27.57          | 30.56     |
| Average   | N/A                  | 69.09      | 53.48        | 61.75          | 70.52     |

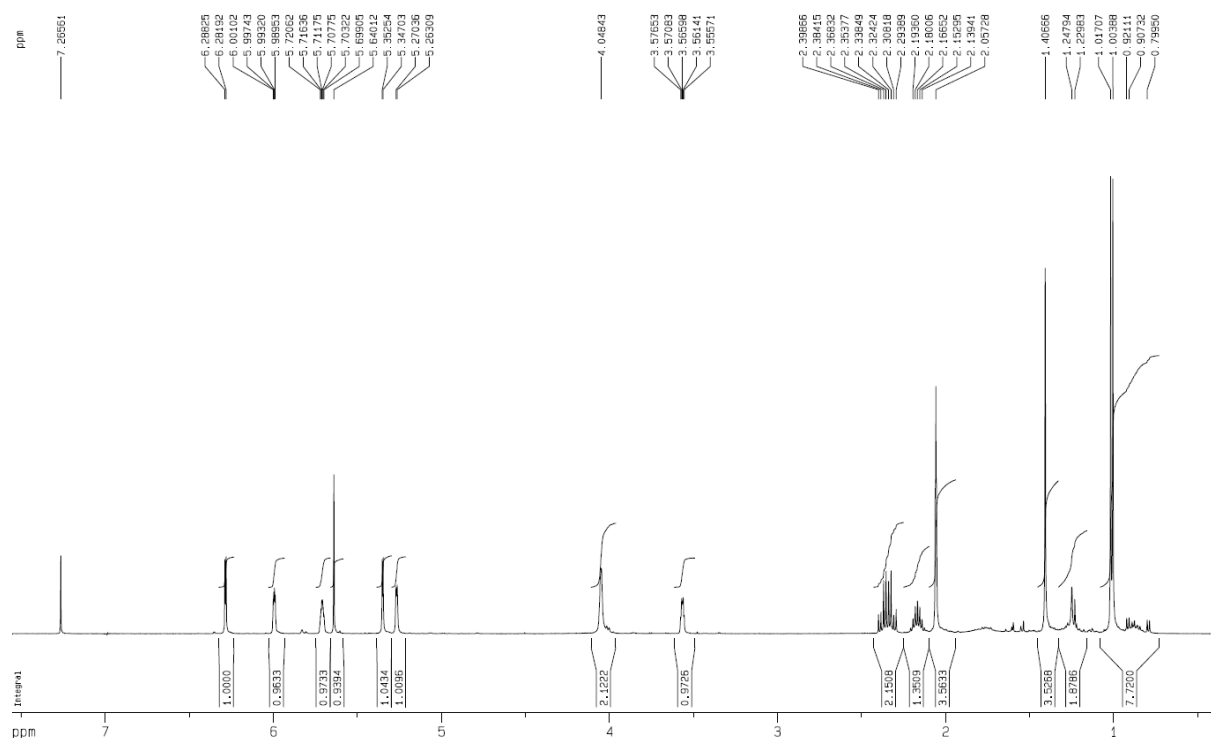

**Figure S10.**  $^1\text{H}$  NMR spectrum of **3**

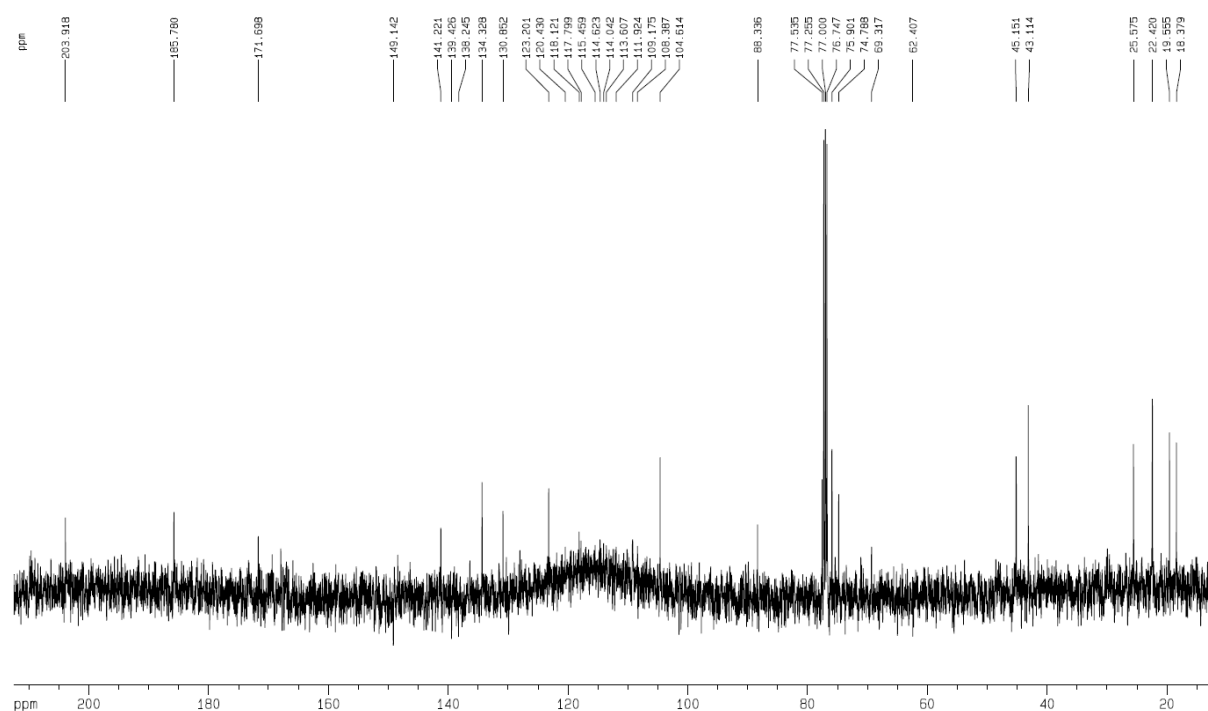

**Figure S11.**  $^{13}\text{C}$  NMR spectrum of **3**

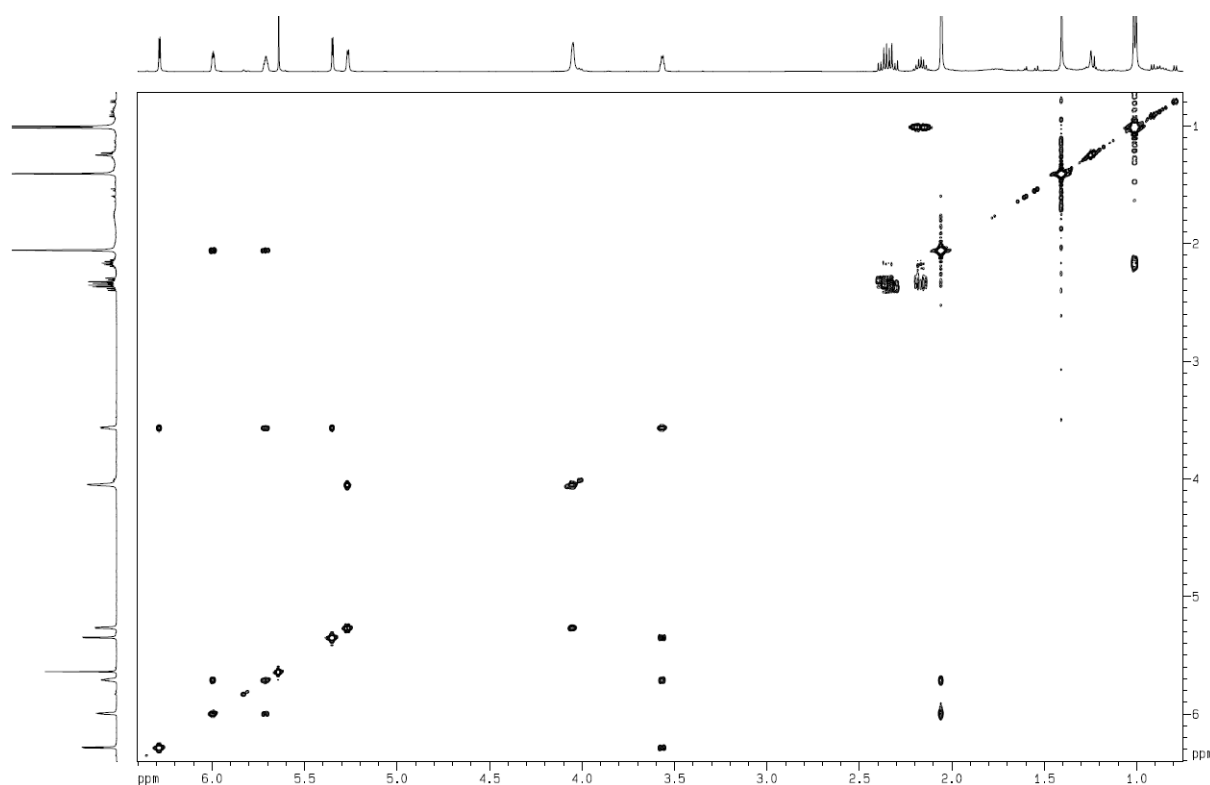

**Figure S12.**  $^1\text{H}$ - $^1\text{H}$  COSY spectrum of **3**

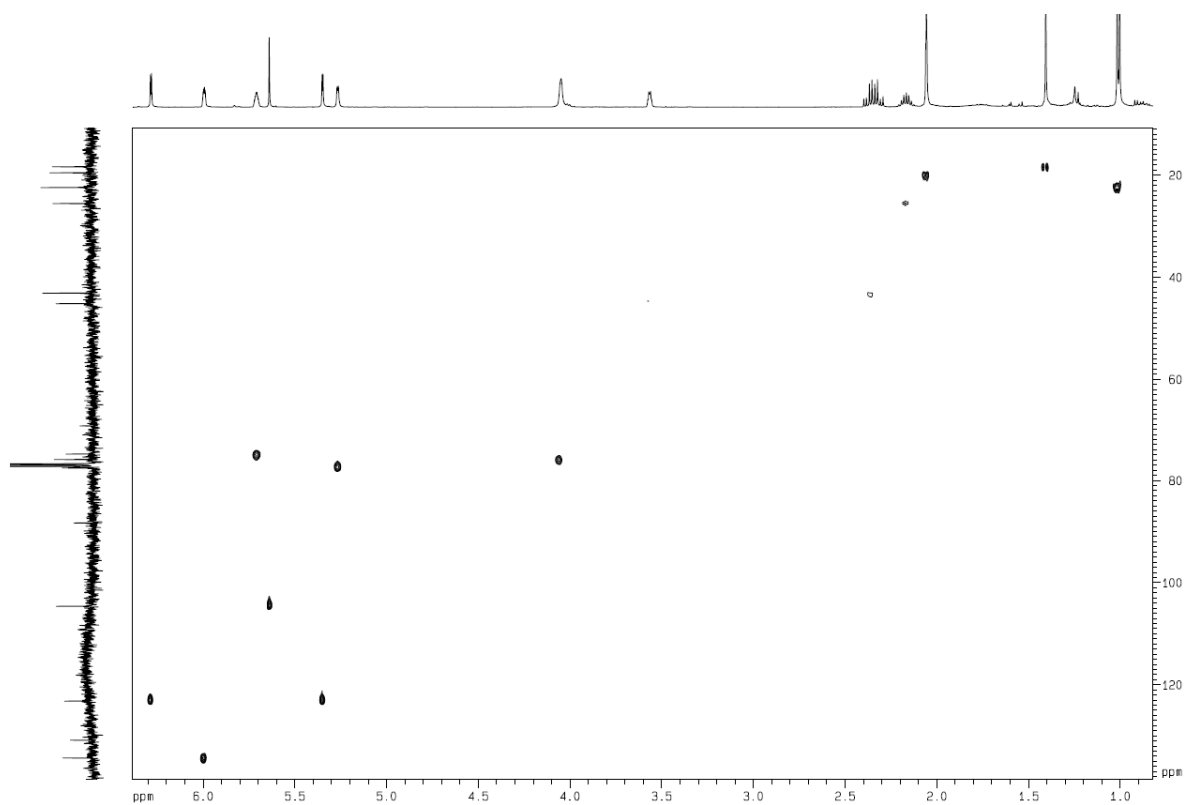

**Figure S13.** HSQC spectrum of **3**

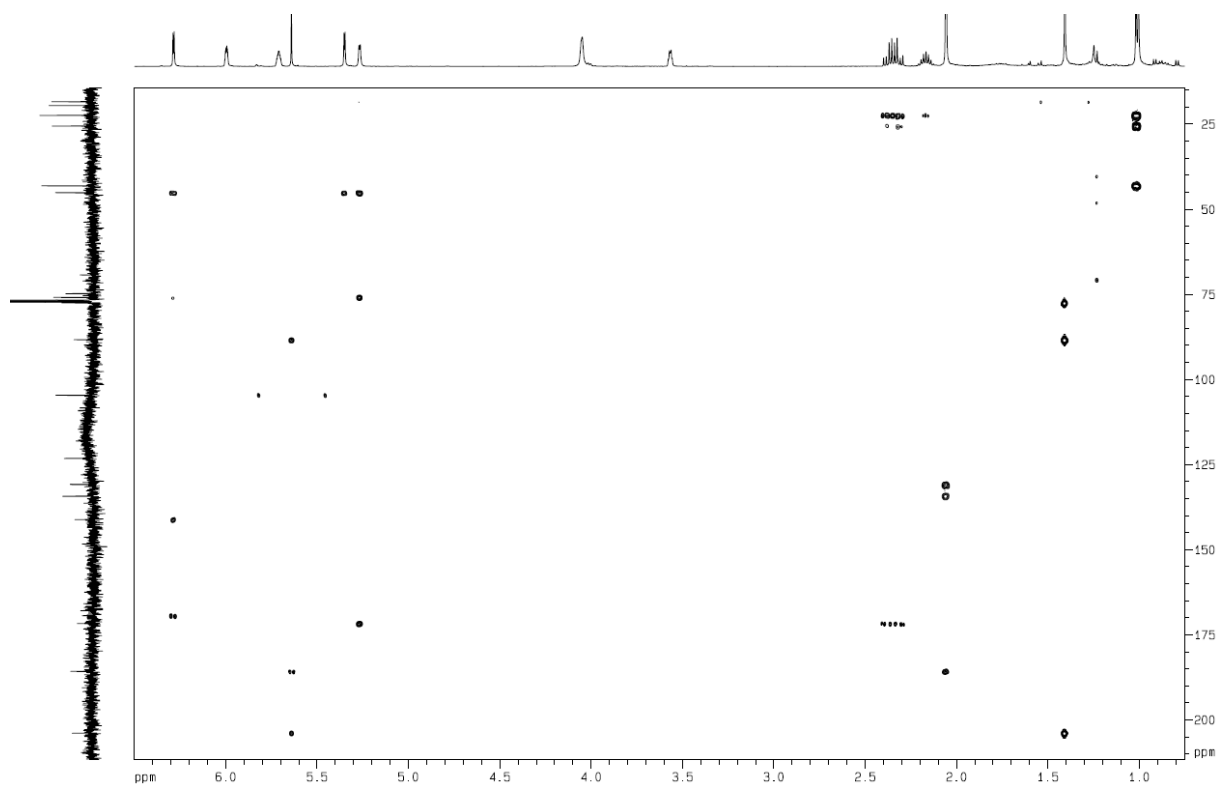

Figure S14. HMBC spectrum of **3**

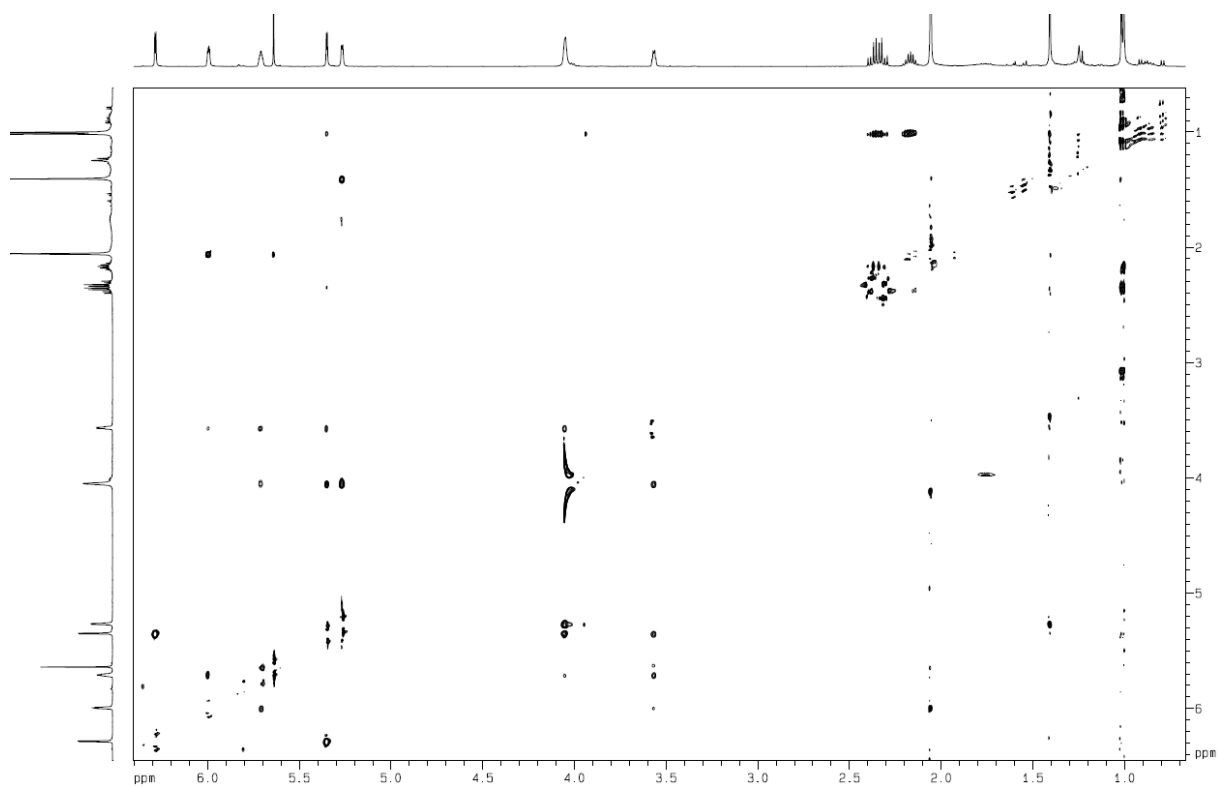

Figure S15. NOESY spectrum of **3**

+Q1: 0.251 to 0.369 min from Sample 2 (LOB-40 ESI pos Q1) of 150326.wiff (Turbo Spray), subtracted (0.000 to 0.117 min)

Max. 3.3e6 cps.

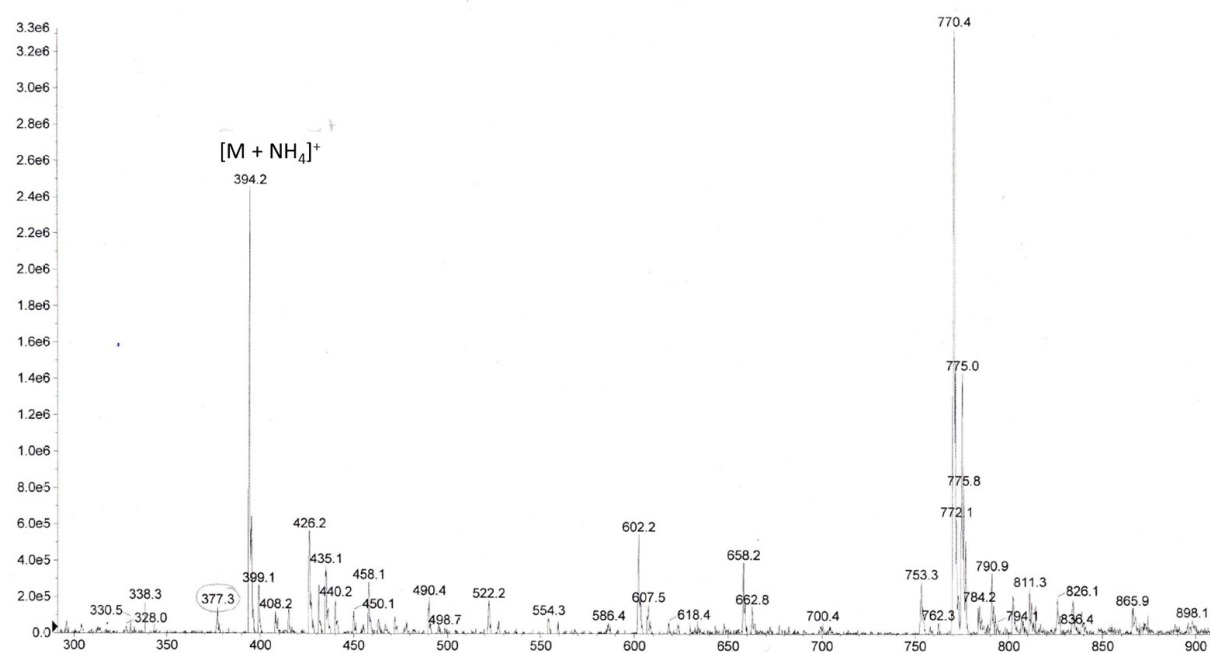

Figure S16. HRMS spectrum of 3

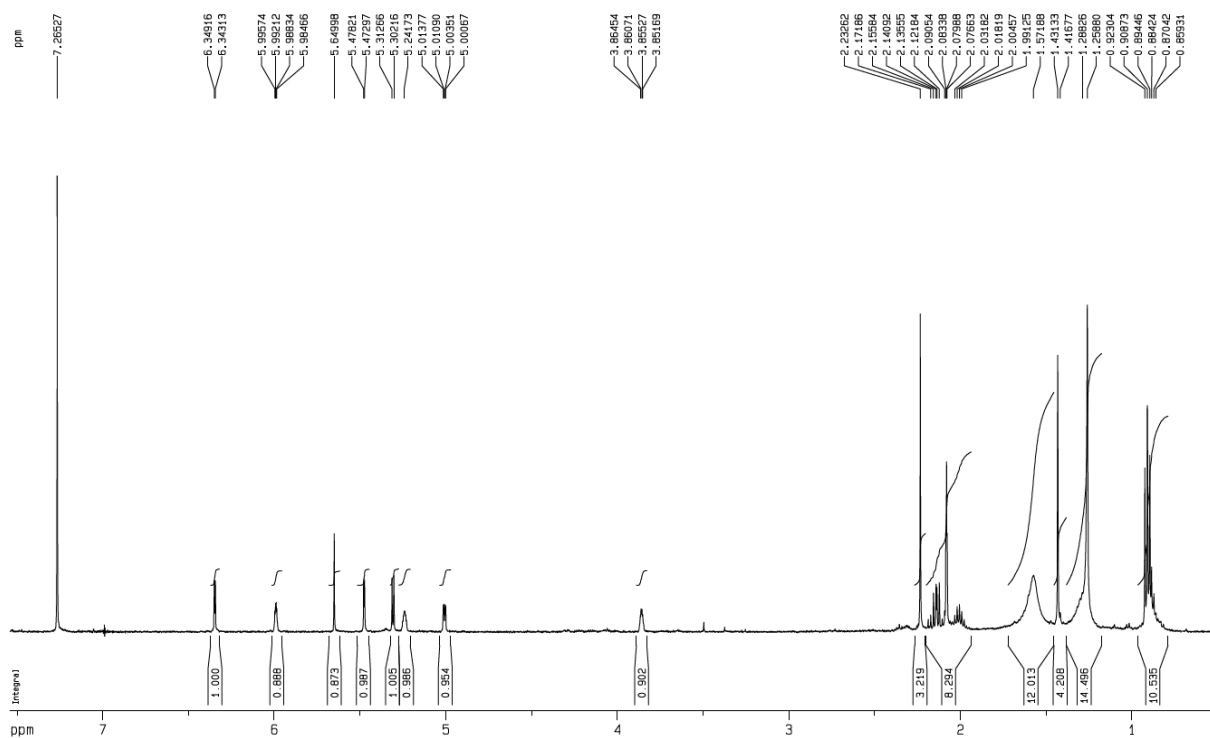

Figure S17. <sup>1</sup>H NMR spectrum of 4



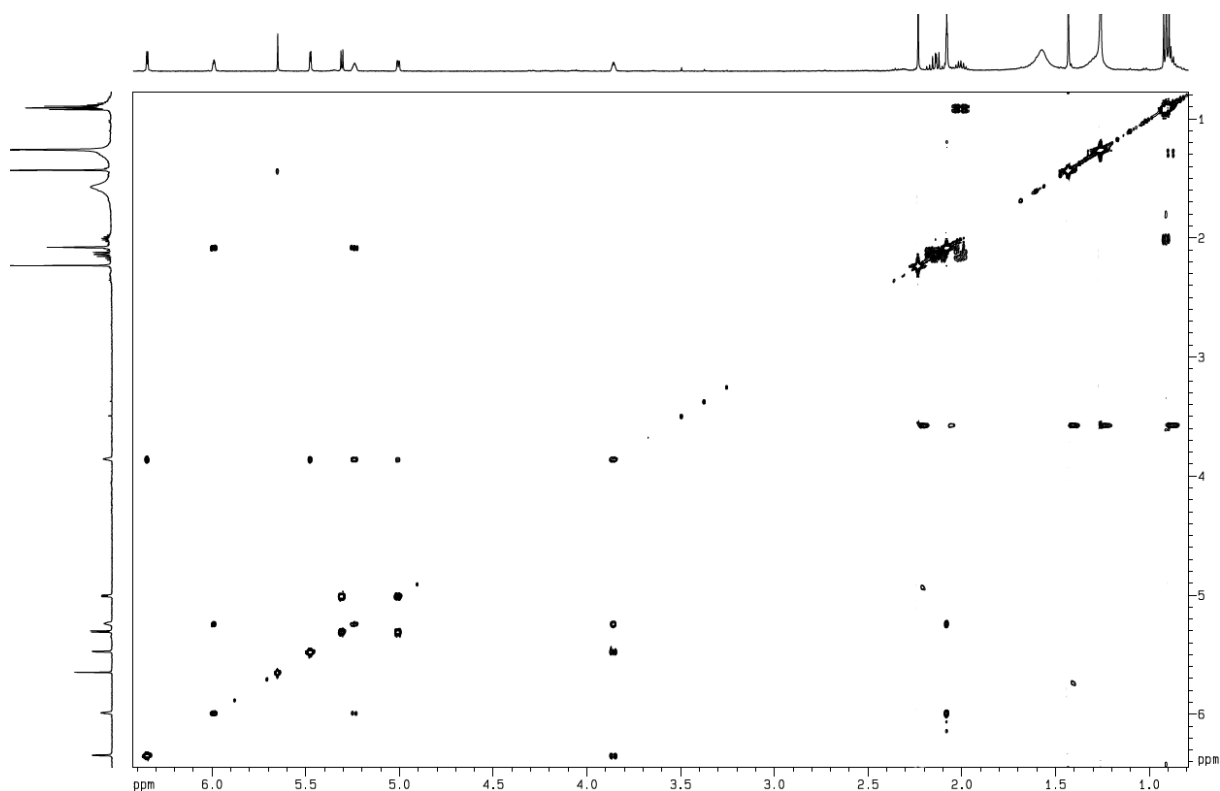

**Figure S18.**  $^1\text{H}$ - $^1\text{H}$  COSY spectrum of **4**

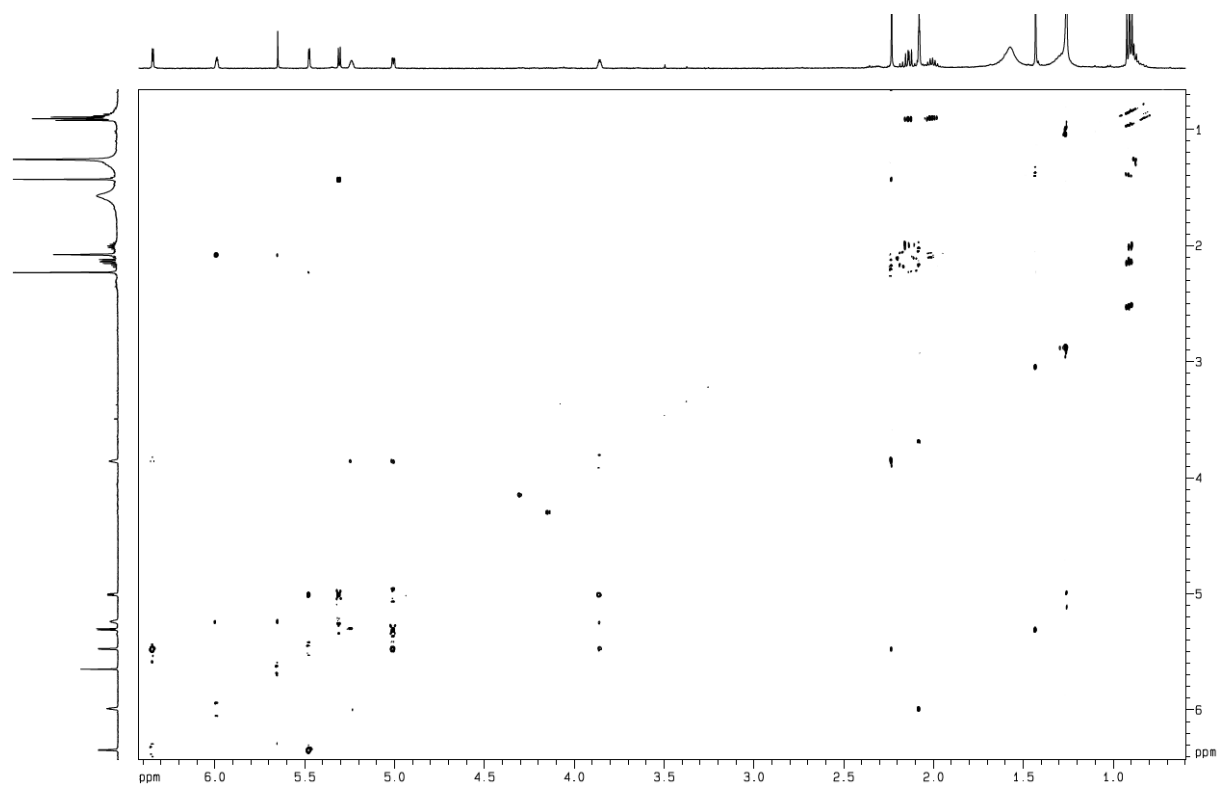

**Figure S19.** NOESY spectrum of **4**

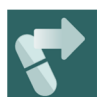

+Q1: 0.184 to 0.218 min from Sample 14 (LOB-39 APC1 pos Q1) of 150403.wiff (Heated Nebulizer), subtracted (0.000 to 0.117 min)

Max. 8.4e6

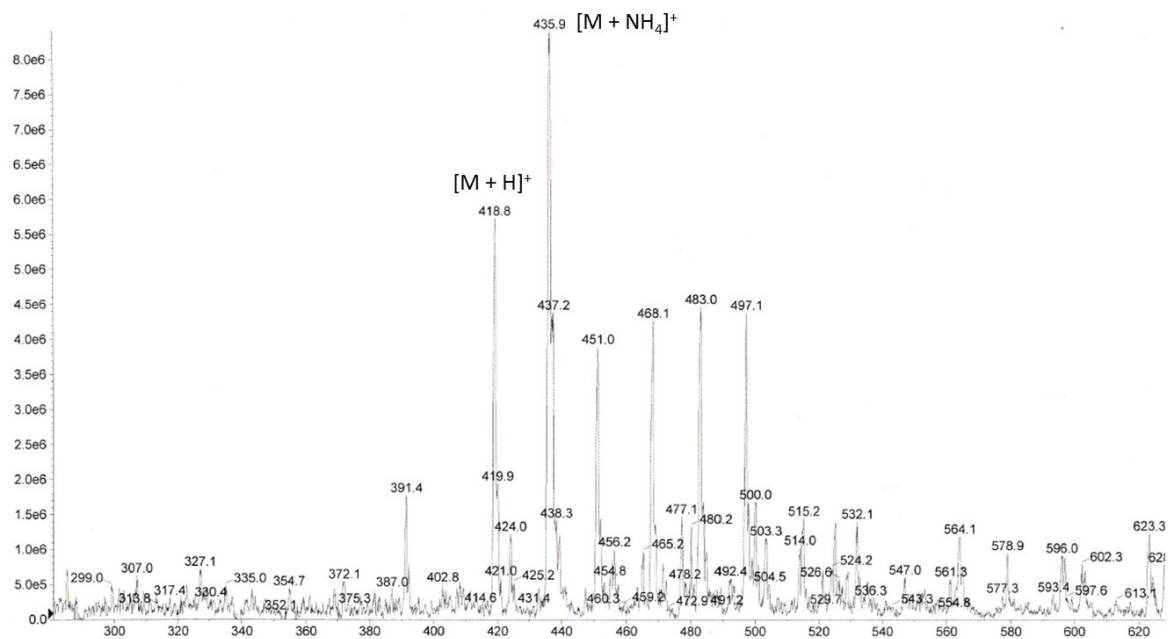

Figure S20. HRMS spectrum of 4

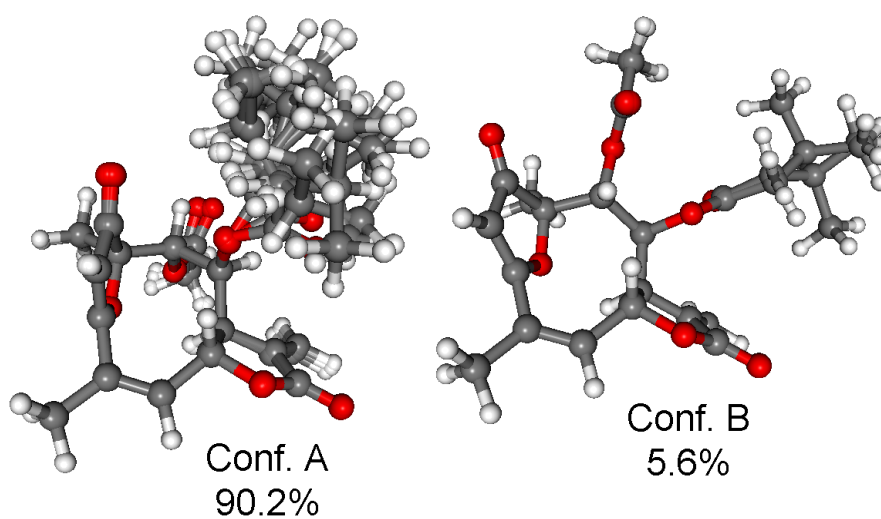

Figure S21. Overlapped geometries of the conformers of the two conformer groups of (6R,7S,8S,9R,10R)-4. Group A: confs. A-F, I, J; group B: confs. G, H. Level of optimization: CAM-B3LYP/TZVP PCM/MeCN.

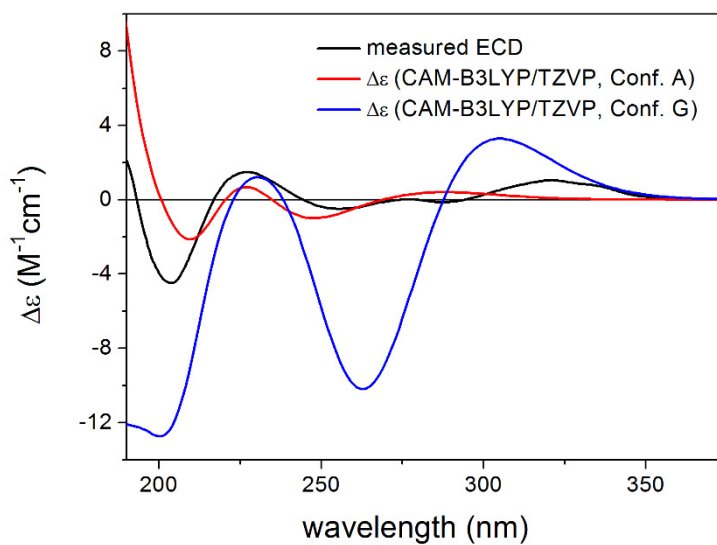

**Figure S22.** Comparison of the experimental ECD spectrum of **4** measured in MeCN with the CAM-B3LYP/TZVP PCM/MeCN spectra of conformers A and G of (6R,7S,8S,9R,10R)-**4**, as the lowest-energy representatives of groups A and B. Level of optimization: CAM-B3LYP/TZVP PCM/MeCN.

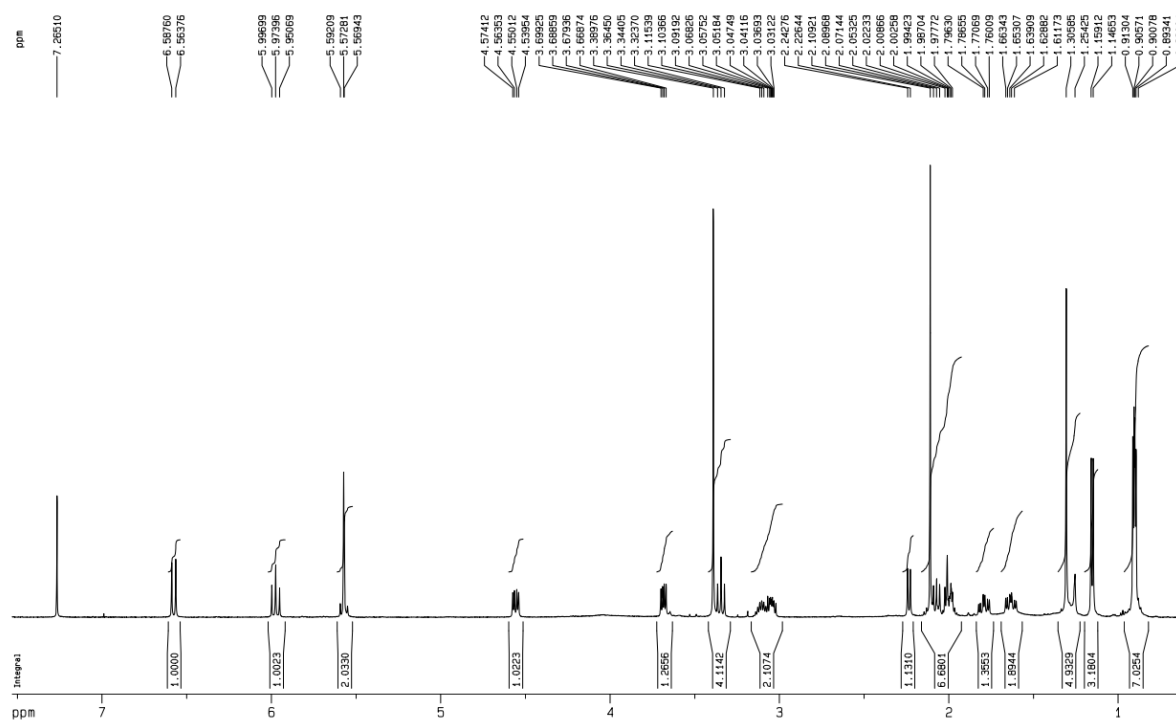

**Figure S23.**  $^1H$  NMR spectrum of **5**

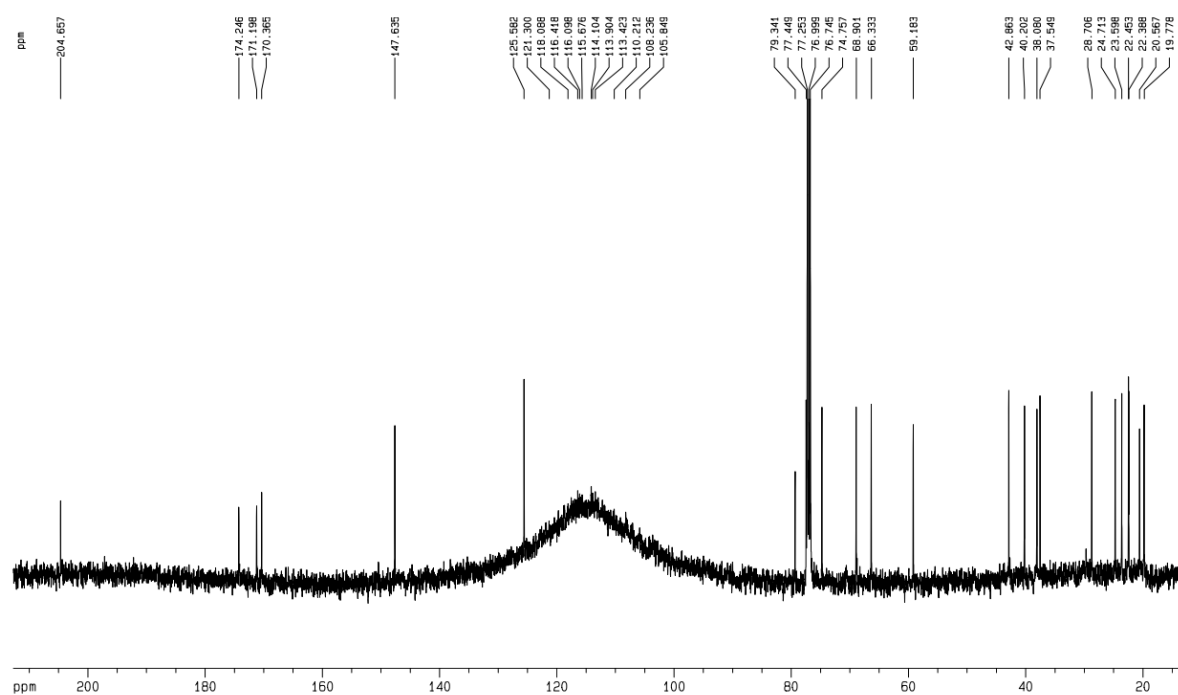

Figure S24. JMOD spectrum of 5

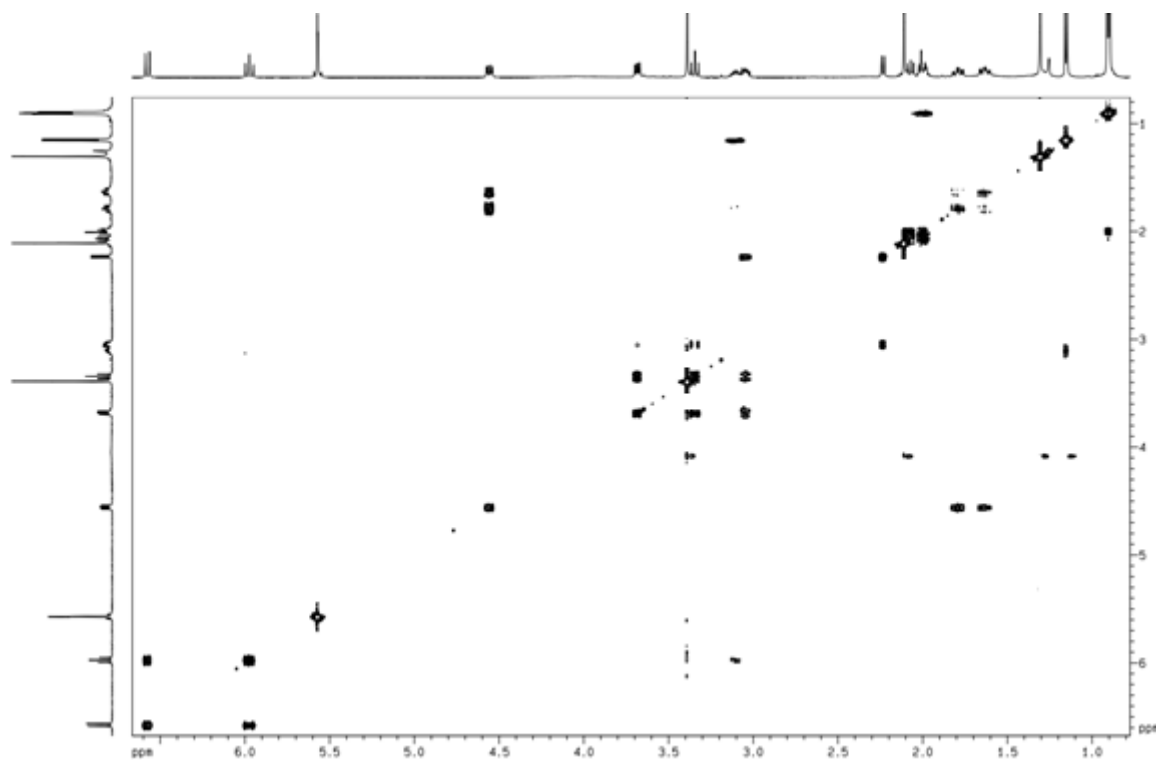

Figure S25.  $^1\text{H}$ - $^1\text{H}$  COSY spectrum of 5

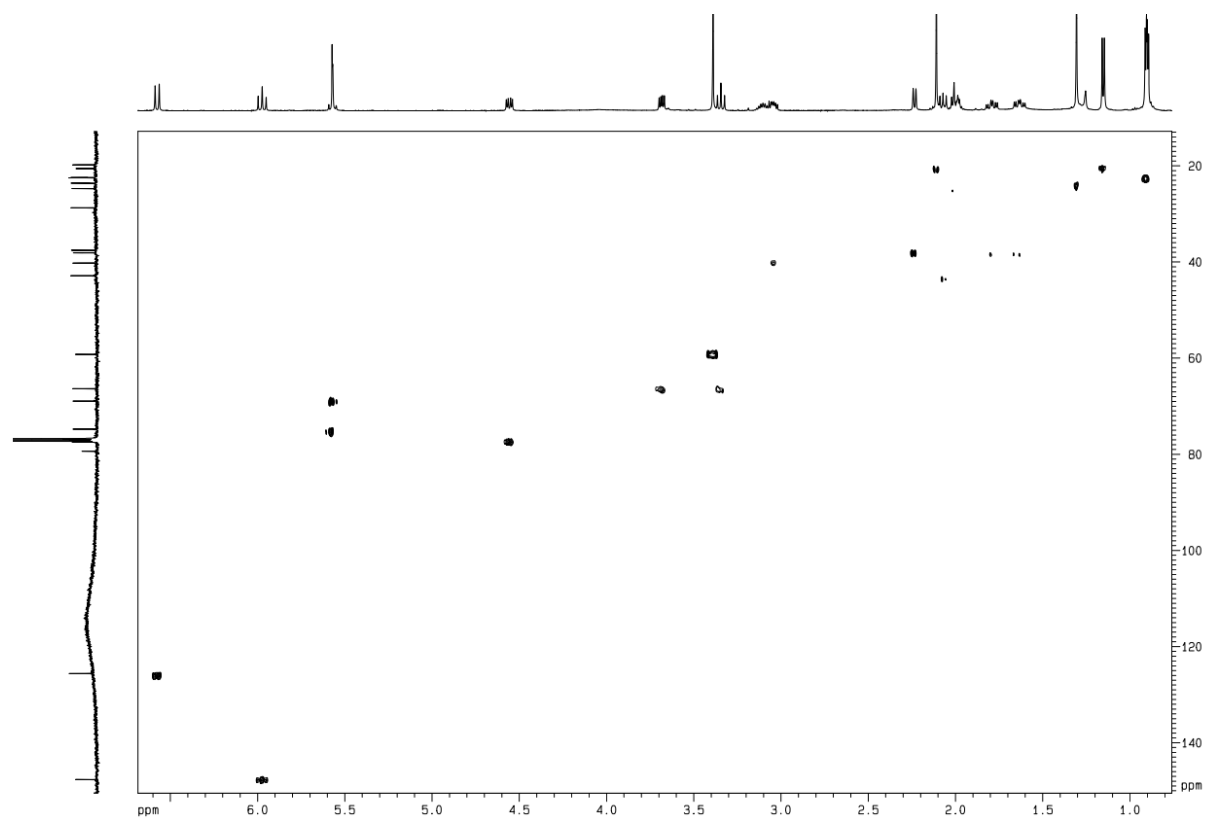

Figure S26. HSQC spectrum of 5

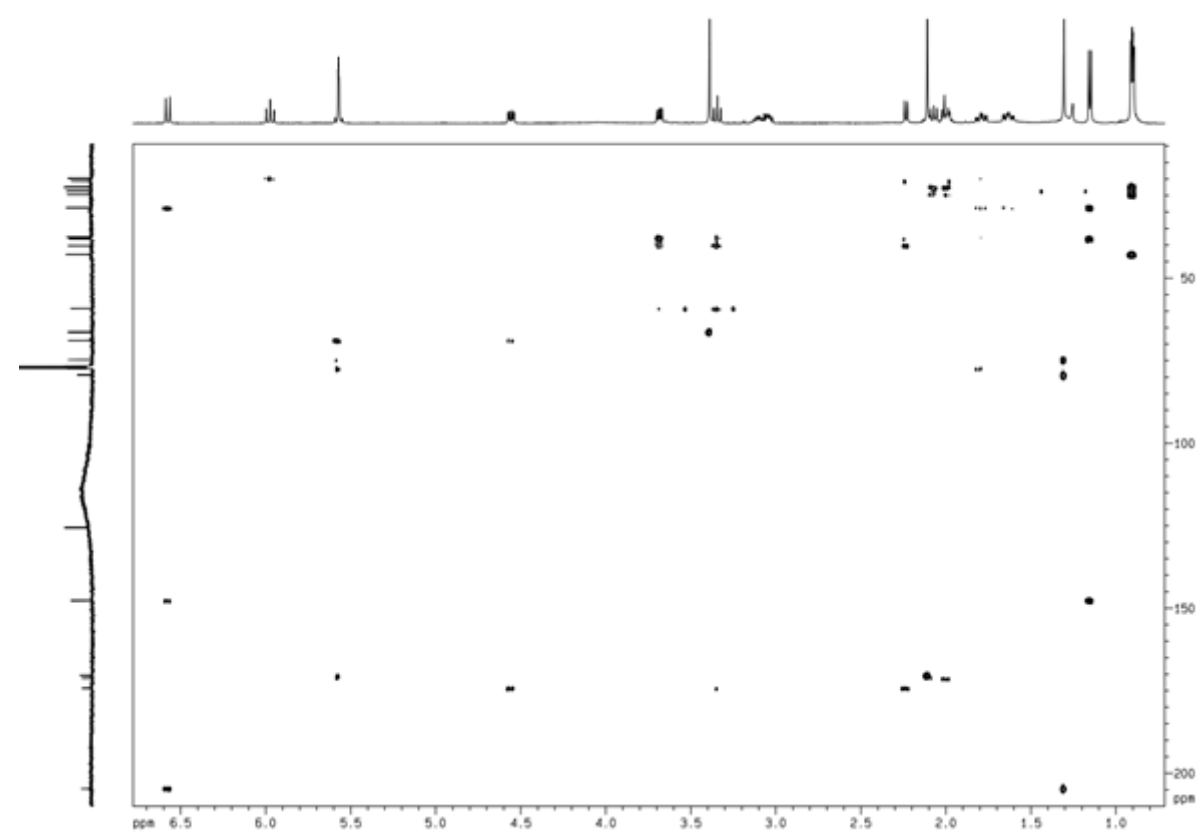

**Figure S27.** HMBC spectrum of **5**

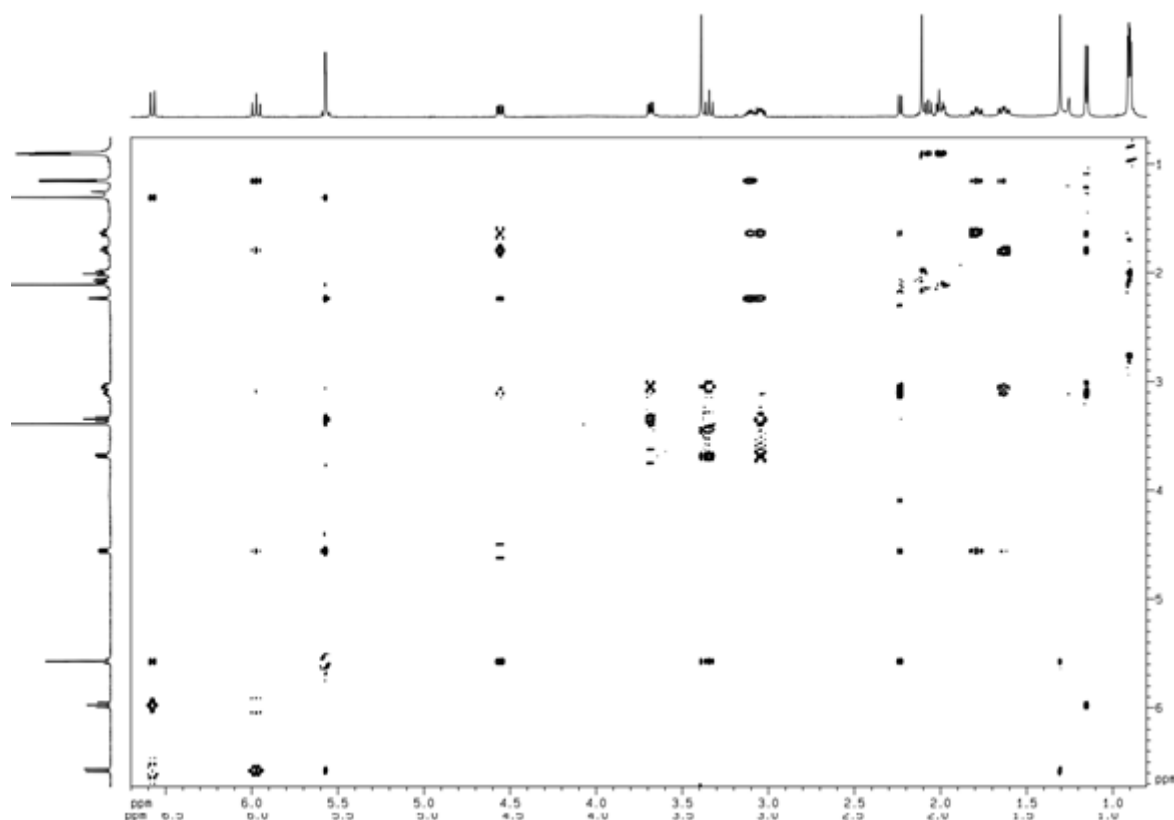

**Figure S28.** NOESY spectrum of **5**

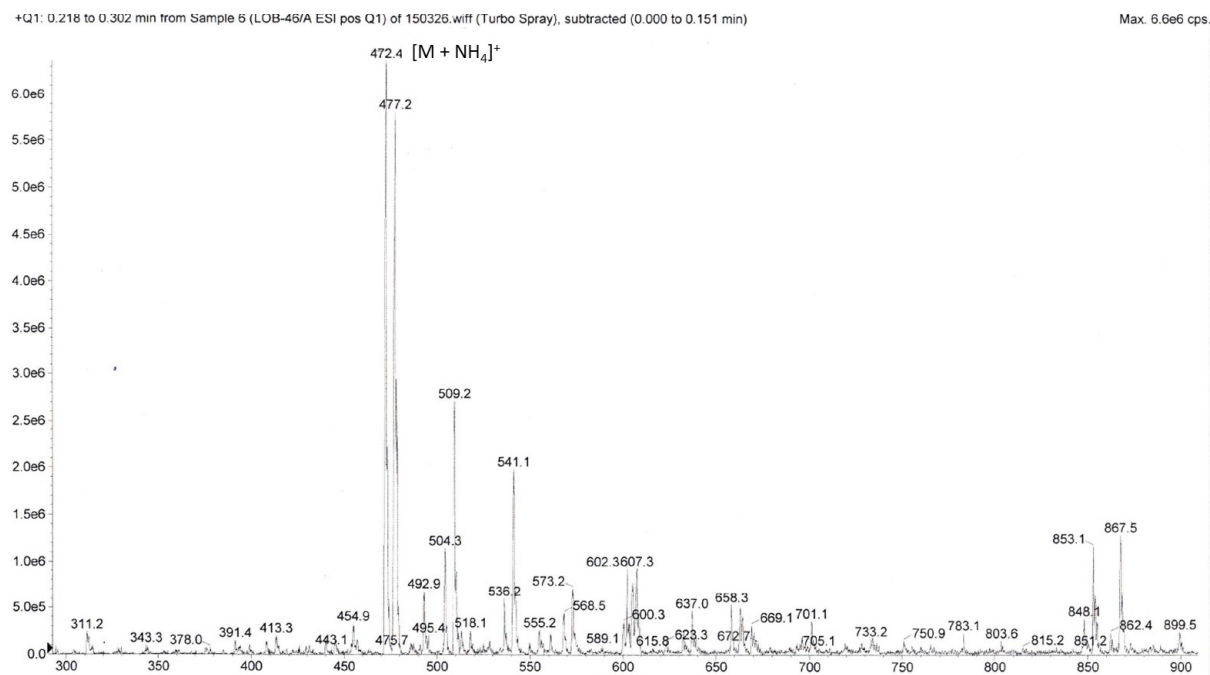

**Figure S29.** HRMS spectrum of **5**



**Table S5.** Comparison of the experimental  $^{13}\text{C}$  NMR data of all carbons of **5** with the mPW1PW91/6-311+G(2d,p) // B3LYP/6-31+G(d,p) ones of the 1: (4*R*,6*R*,7*S*,8*S*,9*R*,10*R*,11*S*)-**5**, 2: (4*R*,6*R*,7*S*,8*S*,9*R*,10*R*,11*R*)-**5**, 3: (4*R*,6*R*,7*S*,8*R*,9*R*,10*R*,11*S*)-**5**, 4: (4*R*,6*R*,7*S*,8*R*,9*R*,10*R*,11*R*)-**5**, 5: (4*R*,6*R*,7*S*,8*R*,9*S*,10*R*,11*S*)-**5**, 6: (4*R*,6*R*,7*S*,8*R*,9*S*,10*R*,11*R*)-**5**, 7: (4*R*,6*R*,7*S*,8*S*,9*S*,10*R*,11*S*)-**5** and the 8: (4*R*,6*R*,7*S*,8*S*,9*S*,10*R*,11*R*)-**5** stereoisomers. For better comparison,  $\Delta\delta$  values over 2.5 were highlighted with yellow and those over 5.0 with red.

| Numbering          | Exp   | Calc <sub>1</sub> | Calc <sub>2</sub> | Calc <sub>3</sub> | Calc <sub>4</sub> | Calc <sub>5</sub> | Calc <sub>6</sub> | Calc <sub>7</sub> | Calc <sub>8</sub> | $\Delta\delta_1$ | $\Delta\delta_2$ | $\Delta\delta_3$ | $\Delta\delta_4$ | $\Delta\delta_5$ | $\Delta\delta_6$ | $\Delta\delta_7$ | $\Delta\delta_8$ |
|--------------------|-------|-------------------|-------------------|-------------------|-------------------|-------------------|-------------------|-------------------|-------------------|------------------|------------------|------------------|------------------|------------------|------------------|------------------|------------------|
| C-1                | 204.7 | 208.73            | 208.50            | 208.24            | 208.04            | 209.38            | 209.19            | 208.86            | 208.44            | 4.03             | 3.80             | 3.54             | 3.34             | 4.68             | 4.49             | 4.16             | 3.74             |
| C-2                | 125.6 | 127.84            | 126.69            | 126.75            | 125.97            | 127.01            | 126.96            | 129.03            | 127.89            | 2.24             | 1.09             | 1.15             | 0.37             | 1.41             | 1.36             | 3.43             | 2.29             |
| C-3                | 147.6 | 152.98            | 154.52            | 156.00            | 157.96            | 156.56            | 158.23            | 151.47            | 153.28            | 5.38             | 6.92             | 8.40             | 10.36            | 8.96             | 10.63            | 3.87             | 5.68             |
| C-4                | 28.7  | 30.88             | 30.33             | 30.27             | 30.82             | 31.81             | 31.56             | 30.81             | 30.25             | 2.18             | 1.63             | 1.57             | 2.12             | 3.11             | 2.86             | 2.11             | 1.55             |
| C-5                | 38.1  | 38.46             | 39.94             | 38.83             | 41.15             | 39.26             | 42.15             | 39.58             | 41.42             | 0.36             | 1.84             | 0.73             | 3.05             | 1.16             | 4.05             | 1.48             | 3.32             |
| C-6                | 77.4  | 76.85             | 77.45             | 76.35             | 81.05             | 82.23             | 81.52             | 76.72             | 77.55             | 0.55             | 0.05             | 1.05             | 3.65             | 4.83             | 4.12             | 0.68             | 0.15             |
| C-7                | 37.5  | 40.10             | 40.65             | 42.77             | 39.95             | 40.36             | 42.61             | 40.08             | 40.84             | 2.60             | 3.15             | 5.27             | 2.45             | 2.86             | 5.11             | 2.58             | 3.34             |
| C-8                | 68.9  | 68.92             | 73.87             | 72.74             | 75.06             | 71.48             | 71.03             | 67.86             | 71.46             | 0.02             | 4.97             | 3.84             | 6.16             | 2.58             | 2.13             | 1.04             | 2.56             |
| C-9                | 74.8  | 75.41             | 74.89             | 73.81             | 78.07             | 78.70             | 80.09             | 77.54             | 77.57             | 0.61             | 0.09             | 0.99             | 3.27             | 3.90             | 5.29             | 2.74             | 2.77             |
| C-10               | 79.3  | 81.22             | 80.97             | 82.46             | 80.14             | 82.35             | 81.49             | 79.56             | 79.31             | 1.92             | 1.67             | 3.16             | 0.84             | 3.05             | 2.19             | 0.26             | 0.01             |
| C-11               | 40.2  | 42.54             | 47.77             | 44.63             | 46.15             | 43.97             | 43.46             | 42.41             | 47.70             | 2.34             | 7.57             | 4.43             | 5.95             | 3.77             | 3.26             | 2.21             | 7.50             |
| C-12               | 174.2 | 173.91            | 176.00            | 173.24            | 175.95            | 174.14            | 176.72            | 174.06            | 175.76            | 0.29             | 1.80             | 0.96             | 1.75             | 0.06             | 2.52             | 0.14             | 1.56             |
| C-13               | 66.3  | 65.71             | 70.36             | 67.02             | 70.77             | 66.42             | 71.90             | 65.96             | 70.41             | 0.59             | 4.06             | 0.72             | 4.47             | 0.12             | 5.60             | 0.34             | 4.11             |
| C-14               | 23.6  | 22.46             | 22.53             | 22.22             | 22.03             | 18.20             | 16.24             | 23.41             | 23.32             | 1.14             | 1.07             | 1.38             | 1.57             | 5.40             | 7.36             | 0.19             | 0.28             |
| C-15               | 19.8  | 18.71             | 18.78             | 18.59             | 18.45             | 18.35             | 18.40             | 18.82             | 18.88             | 1.09             | 1.02             | 1.21             | 1.35             | 1.45             | 1.40             | 0.98             | 0.92             |
| OMe                | 59.2  | 56.83             | 56.56             | 56.48             | 56.61             | 56.82             | 56.59             | 56.81             | 56.57             | 2.37             | 2.64             | 2.72             | 2.59             | 2.38             | 2.61             | 2.39             | 2.63             |
| ival CO 1'         | 171.2 | 173.21            | 174.25            | 174.55            | 174.51            | 174.11            | 174.08            | 173.39            | 173.60            | 2.01             | 3.05             | 3.35             | 3.31             | 2.91             | 2.88             | 2.19             | 2.40             |
| C-2'               | 42.9  | 42.02             | 41.92             | 42.06             | 42.48             | 41.86             | 42.40             | 41.63             | 41.50             | 0.88             | 0.98             | 0.84             | 0.42             | 1.04             | 0.50             | 1.27             | 1.40             |
| C-3'               | 24.7  | 26.82             | 26.94             | 26.71             | 27.53             | 27.12             | 27.72             | 26.82             | 26.86             | 2.12             | 2.24             | 2.01             | 2.83             | 2.42             | 3.02             | 2.12             | 2.16             |
| C-4'               | 22.4  | 20.58             | 20.52             | 20.74             | 20.44             | 20.43             | 20.34             | 20.35             | 20.22             | 1.82             | 1.88             | 1.66             | 1.96             | 1.97             | 2.06             | 2.05             | 2.18             |
| C-5'               | 22.5  | 20.64             | 20.64             | 20.97             | 20.54             | 20.52             | 20.56             | 20.61             | 20.64             | 1.86             | 1.86             | 1.53             | 1.96             | 1.98             | 1.94             | 1.89             | 1.86             |
| Ac CO              | 170.4 | 172.34            | 171.98            | 171.90            | 170.93            | 170.53            | 171.85            | 170.80            | 170.93            | 1.94             | 1.58             | 1.50             | 0.53             | 0.13             | 1.45             | 0.40             | 0.53             |
| Ac CH <sub>3</sub> | 20.6  | 19.76             | 19.79             | 19.77             | 19.88             | 19.92             | 19.72             | 20.25             | 20.27             | 0.84             | 0.81             | 0.83             | 0.72             | 0.68             | 0.88             | 0.35             | 0.33             |
| CMAE               | N/A   | N/A               | N/A               | N/A               | N/A               | N/A               | N/A               | N/A               | N/A               | 1.70             | 2.43             | 2.30             | 2.83             | 2.65             | 3.38             | 1.69             | 2.32             |



**Table S6.** Comparison of the experimental  $^{13}\text{C}$  NMR data of all carbons of **5** with the mPW1PW91/6-311+G(2d,p) SMD/ $\text{CDCl}_3$  // B3LYP/6-31+G(d,p) ones of the 1: (4*R*,6*R*,7*S*,8*S*,9*R*,10*R*,11*S*)-**5**, 2: (4*R*,6*R*,7*S*,8*S*,9*R*,10*R*,11*R*)-**5**, 3: (4*R*,6*R*,7*S*,8*R*,9*R*,10*R*,11*S*)-**5**, 4: (4*R*,6*R*,7*S*,8*R*,9*R*,10*R*,11*R*)-**5**, 5: (4*R*,6*R*,7*S*,8*R*,9*S*,10*R*,11*S*)-**5**, 6: (4*R*,6*R*,7*S*,8*R*,9*S*,10*R*,11*R*)-**5**, 7: (4*R*,6*R*,7*S*,8*S*,9*S*,10*R*,11*S*)-**5** and the 8: (4*R*,6*R*,7*S*,8*S*,9*S*,10*R*,11*R*)-**5** stereoisomers. For better comparison,  $\Delta\delta$  values over 2.5 were highlighted with yellow and those over 5.0 with red.

| Numbering          | Exp   | Calc <sub>1</sub> | Calc <sub>2</sub> | Calc <sub>3</sub> | Calc <sub>4</sub> | Calc <sub>5</sub> | Calc <sub>6</sub> | Calc <sub>7</sub> | Calc <sub>8</sub> | $\Delta\delta_1$ | $\Delta\delta_2$ | $\Delta\delta_3$ | $\Delta\delta_4$ | $\Delta\delta_5$ | $\Delta\delta_6$ | $\Delta\delta_7$ | $\Delta\delta_8$ |
|--------------------|-------|-------------------|-------------------|-------------------|-------------------|-------------------|-------------------|-------------------|-------------------|------------------|------------------|------------------|------------------|------------------|------------------|------------------|------------------|
| C-1                | 204.7 | 206.10            | 206.00            | 206.18            | 205.84            | 207.04            | 206.37            | 206.57            | 206.04            | 1.40             | 1.30             | 1.48             | 1.14             | 2.34             | 1.67             | 1.87             | 1.34             |
| C-2                | 125.6 | 125.83            | 124.92            | 124.97            | 124.66            | 125.33            | 125.25            | 126.85            | 125.79            | 0.23             | 0.68             | 0.63             | 0.94             | 0.27             | 0.35             | 1.25             | 0.19             |
| C-3                | 147.6 | 153.02            | 153.78            | 155.70            | 157.35            | 157.22            | 158.04            | 151.47            | 153.00            | 5.42             | 6.18             | 8.10             | 9.75             | 9.62             | 10.44            | 3.87             | 5.40             |
| C-4                | 28.7  | 31.60             | 31.21             | 31.14             | 31.67             | 32.96             | 32.66             | 31.65             | 31.34             | 2.90             | 2.51             | 2.44             | 2.97             | 4.26             | 3.96             | 2.95             | 2.64             |
| C-5                | 38.1  | 37.96             | 39.69             | 38.48             | 40.89             | 38.99             | 41.77             | 38.89             | 40.87             | 0.14             | 1.59             | 0.38             | 2.79             | 0.89             | 3.67             | 0.79             | 2.77             |
| C-6                | 77.4  | 77.12             | 77.51             | 76.62             | 80.71             | 82.08             | 81.13             | 77.09             | 77.81             | 0.28             | 0.11             | 0.78             | 3.31             | 4.68             | 3.73             | 0.31             | 0.41             |
| C-7                | 37.5  | 40.46             | 40.92             | 42.90             | 40.24             | 40.36             | 42.41             | 40.41             | 41.04             | 2.96             | 3.42             | 5.40             | 2.74             | 2.86             | 4.91             | 2.91             | 3.54             |
| C-8                | 68.9  | 68.62             | 73.62             | 72.55             | 74.46             | 71.02             | 70.29             | 67.77             | 71.36             | 0.28             | 4.72             | 3.65             | 5.56             | 2.12             | 1.39             | 1.13             | 2.46             |
| C-9                | 74.8  | 75.30             | 74.63             | 73.68             | 77.71             | 77.98             | 78.68             | 76.75             | 76.53             | 0.50             | 0.17             | 1.12             | 2.91             | 3.18             | 3.88             | 1.95             | 1.73             |
| C-10               | 79.3  | 80.73             | 80.07             | 81.82             | 79.51             | 81.60             | 80.77             | 78.82             | 78.63             | 1.43             | 0.77             | 2.52             | 0.21             | 2.30             | 1.47             | 0.48             | 0.67             |
| C-11               | 40.2  | 42.62             | 48.37             | 45.22             | 46.70             | 44.15             | 44.20             | 42.49             | 48.22             | 2.42             | 8.17             | 5.02             | 6.50             | 3.95             | 4.00             | 2.29             | 8.02             |
| C-12               | 174.2 | 174.29            | 176.98            | 174.47            | 177.19            | 174.53            | 177.59            | 174.78            | 177.11            | 0.09             | 2.78             | 0.27             | 2.99             | 0.33             | 3.39             | 0.58             | 2.91             |
| C-13               | 66.3  | 65.17             | 69.64             | 66.53             | 70.01             | 65.95             | 71.13             | 65.38             | 69.62             | 1.13             | 3.34             | 0.23             | 3.71             | 0.35             | 4.83             | 0.92             | 3.32             |
| C-14               | 23.6  | 22.86             | 22.86             | 22.70             | 22.62             | 18.45             | 16.82             | 23.64             | 23.60             | 0.74             | 0.74             | 0.90             | 0.98             | 5.15             | 6.78             | 0.04             | 0.00             |
| C-15               | 19.8  | 18.58             | 18.93             | 18.42             | 18.51             | 18.50             | 18.58             | 18.66             | 18.96             | 1.22             | 0.87             | 1.38             | 1.29             | 1.30             | 1.22             | 1.14             | 0.84             |
| OMe                | 59.2  | 56.47             | 55.96             | 56.07             | 56.10             | 56.34             | 56.14             | 56.40             | 56.03             | 2.73             | 3.24             | 3.13             | 3.10             | 2.86             | 3.06             | 2.80             | 3.17             |
| ival CO 1'         | 171.2 | 171.98            | 173.13            | 172.96            | 173.29            | 172.93            | 172.88            | 172.23            | 172.55            | 0.78             | 1.93             | 1.76             | 2.09             | 1.73             | 1.68             | 1.03             | 1.35             |
| C-2'               | 42.9  | 42.04             | 42.14             | 42.11             | 42.58             | 42.04             | 42.44             | 41.88             | 41.83             | 0.86             | 0.76             | 0.79             | 0.32             | 0.86             | 0.46             | 1.02             | 1.07             |
| C-3'               | 24.7  | 27.50             | 27.71             | 27.23             | 28.28             | 27.80             | 28.62             | 27.26             | 27.23             | 2.80             | 3.01             | 2.53             | 3.58             | 3.10             | 3.92             | 2.56             | 2.53             |
| C-4'               | 22.4  | 20.41             | 20.35             | 20.53             | 20.21             | 20.23             | 20.22             | 20.15             | 20.06             | 1.99             | 2.05             | 1.87             | 2.19             | 2.17             | 2.18             | 2.25             | 2.34             |
| C-5'               | 22.5  | 20.49             | 20.44             | 20.75             | 20.37             | 20.38             | 20.35             | 20.34             | 20.44             | 2.01             | 2.06             | 1.75             | 2.13             | 2.12             | 2.15             | 2.16             | 2.06             |
| Ac CO              | 170.4 | 171.76            | 171.54            | 171.59            | 171.10            | 170.30            | 171.55            | 170.63            | 170.79            | 1.36             | 1.14             | 1.19             | 0.70             | 0.10             | 1.15             | 0.23             | 0.39             |
| Ac CH <sub>3</sub> | 20.6  | 20.52             | 20.59             | 20.54             | 20.62             | 20.56             | 20.44             | 20.96             | 21.01             | 0.08             | 0.01             | 0.06             | 0.02             | 0.04             | 0.16             | 0.36             | 0.41             |
| CMAE               | N/A   | N/A               | N/A               | N/A               | N/A               | N/A               | N/A               | N/A               | N/A               | 1.47             | 2.24             | 2.06             | 2.69             | 2.46             | 3.06             | 1.52             | 2.15             |

**Table S7.** Comparison of the experimental  $^1\text{H}$  NMR data of all hydrogens except for the OH hydrogen of **5** with the mPW1PW91/6-311+G(2d,p) // B3LYP/6-31+G(d,p) ones of the 1: (4*R*,6*R*,7*S*,8*S*,9*R*,10*R*,11*S*)-**5**, 2: (4*R*,6*R*,7*S*,8*S*,9*R*,10*R*,11*R*)-**5**, 3: (4*R*,6*R*,7*S*,8*R*,9*R*,10*R*,11*S*)-**5**, 4: (4*R*,6*R*,7*S*,8*R*,9*R*,10*R*,11*R*)-**5**, 5: (4*R*,6*R*,7*S*,8*R*,9*S*,10*R*,11*S*)-**5**, 6: (4*R*,6*R*,7*S*,8*R*,9*S*,10*R*,11*R*)-**5**, 7: (4*R*,6*R*,7*S*,8*S*,9*S*,10*R*,11*S*)-**5** and the 8: (4*R*,6*R*,7*S*,8*S*,9*S*,10*R*,11*R*)-**5** stereoisomers. Shielding constants related to the hydrogen atoms in the methyl groups were averaged. For better comparison,  $\Delta\delta$  values over 0.3 were highlighted with yellow and those over 0.6 with red.

| Numbering | Exp  | Calc <sub>1</sub> | Calc <sub>2</sub> | Calc <sub>3</sub> | Calc <sub>4</sub> | Calc <sub>5</sub> | Calc <sub>6</sub> | Calc <sub>7</sub> | Calc <sub>8</sub> | $\Delta\delta_1$ | $\Delta\delta_2$ | $\Delta\delta_3$ | $\Delta\delta_4$ | $\Delta\delta_5$ | $\Delta\delta_6$ | $\Delta\delta_7$ | $\Delta\delta_8$ |
|-----------|------|-------------------|-------------------|-------------------|-------------------|-------------------|-------------------|-------------------|-------------------|------------------|------------------|------------------|------------------|------------------|------------------|------------------|------------------|
| H-2       | 6.58 | 6.64              | 6.60              | 6.58              | 6.56              | 6.63              | 6.69              | 6.50              | 6.46              | 0.06             | 0.02             | 0.00             | 0.02             | 0.05             | 0.11             | 0.08             | 0.12             |
| H-3       | 5.97 | 6.01              | 6.06              | 6.03              | 6.11              | 6.04              | 6.14              | 5.91              | 5.97              | 0.04             | 0.09             | 0.06             | 0.14             | 0.07             | 0.17             | 0.06             | 0.00             |
| H-4       | 3.09 | 3.35              | 3.35              | 3.67              | 3.62              | 3.45              | 3.53              | 3.45              | 3.49              | 0.26             | 0.26             | 0.58             | 0.53             | 0.36             | 0.44             | 0.36             | 0.40             |
| H-5a      | 1.79 | 1.68              | 1.57              | 1.56              | 1.66              | 1.78              | 1.76              | 1.65              | 1.59              | 0.11             | 0.22             | 0.23             | 0.13             | 0.01             | 0.03             | 0.14             | 0.20             |
| H-5b      | 1.63 | 1.57              | 1.99              | 1.62              | 2.11              | 1.66              | 1.97              | 1.58              | 1.97              | 0.06             | 0.36             | 0.01             | 0.48             | 0.03             | 0.34             | 0.05             | 0.34             |
| H-6       | 4.56 | 4.26              | 4.22              | 4.22              | 3.98              | 3.97              | 3.88              | 4.78              | 4.71              | 0.30             | 0.34             | 0.34             | 0.58             | 0.59             | 0.68             | 0.22             | 0.15             |
| H-7       | 2.23 | 2.21              | 2.14              | 2.56              | 2.45              | 2.31              | 2.21              | 2.44              | 2.39              | 0.02             | 0.09             | 0.33             | 0.22             | 0.08             | 0.02             | 0.21             | 0.16             |
| H-8       | 5.57 | 5.65              | 5.63              | 5.12              | 5.22              | 5.29              | 5.23              | 5.61              | 5.62              | 0.08             | 0.06             | 0.45             | 0.35             | 0.28             | 0.34             | 0.04             | 0.05             |
| H-9       | 5.57 | 5.58              | 5.60              | 5.26              | 5.24              | 5.26              | 4.39              | 5.60              | 5.46              | 0.01             | 0.03             | 0.31             | 0.33             | 0.31             | 1.18             | 0.03             | 0.11             |
| H-11      | 3.04 | 2.84              | 2.55              | 2.85              | 2.48              | 2.77              | 3.01              | 2.83              | 2.12              | 0.20             | 0.49             | 0.19             | 0.56             | 0.27             | 0.03             | 0.21             | 0.92             |
| H-13a     | 3.68 | 3.54              | 3.60              | 3.43              | 3.70              | 3.87              | 3.56              | 3.54              | 3.55              | 0.14             | 0.08             | 0.25             | 0.02             | 0.19             | 0.12             | 0.14             | 0.13             |
| H-13b     | 3.34 | 3.46              | 3.35              | 3.39              | 3.43              | 3.64              | 3.79              | 3.03              | 3.35              | 0.12             | 0.01             | 0.05             | 0.09             | 0.30             | 0.45             | 0.31             | 0.01             |
| H-14      | 1.31 | 1.26              | 1.25              | 1.34              | 1.53              | 1.50              | 1.63              | 1.34              | 1.34              | 0.05             | 0.06             | 0.03             | 0.22             | 0.19             | 0.32             | 0.03             | 0.03             |
| H-15      | 1.15 | 1.15              | 1.12              | 1.16              | 1.13              | 1.16              | 1.14              | 1.16              | 1.13              | 0.00             | 0.03             | 0.01             | 0.02             | 0.01             | 0.01             | 0.01             | 0.02             |
| OMe       | 3.39 | 3.15              | 3.39              | 3.34              | 3.40              | 3.62              | 3.42              | 3.24              | 3.24              | 0.24             | 0.00             | 0.05             | 0.01             | 0.23             | 0.03             | 0.15             | 0.15             |
| H-2a'     | 2.00 | 2.17              | 2.21              | 2.39              | 2.24              | 1.99              | 2.06              | 2.00              | 2.04              | 0.17             | 0.21             | 0.39             | 0.24             | 0.01             | 0.06             | 0.00             | 0.04             |
| H-2b'     | 2.00 | 1.95              | 1.97              | 2.24              | 2.16              | 2.19              | 2.20              | 2.04              | 2.09              | 0.05             | 0.03             | 0.24             | 0.16             | 0.19             | 0.20             | 0.04             | 0.09             |
| H-3'      | 2.07 | 2.09              | 2.13              | 2.26              | 2.24              | 2.16              | 2.20              | 2.14              | 2.14              | 0.02             | 0.06             | 0.19             | 0.17             | 0.09             | 0.13             | 0.07             | 0.07             |
| H-4'      | 0.91 | 0.97              | 0.95              | 1.05              | 1.05              | 0.95              | 0.97              | 0.97              | 0.95              | 0.06             | 0.04             | 0.14             | 0.14             | 0.04             | 0.06             | 0.06             | 0.04             |
| H-5'      | 0.89 | 0.93              | 0.93              | 1.03              | 1.04              | 0.95              | 0.96              | 0.92              | 0.92              | 0.04             | 0.04             | 0.14             | 0.15             | 0.06             | 0.07             | 0.03             | 0.03             |
| OAc       | 2.11 | 2.04              | 2.03              | 2.07              | 2.06              | 2.03              | 2.04              | 2.10              | 2.11              | 0.07             | 0.08             | 0.04             | 0.05             | 0.08             | 0.07             | 0.01             | 0.00             |
| H-2       | 6.58 | 6.64              | 6.60              | 6.58              | 6.56              | 6.63              | 6.69              | 6.50              | 6.46              | 0.06             | 0.02             | 0.00             | 0.02             | 0.05             | 0.11             | 0.08             | 0.12             |
| CMAE      | N/A  | N/A               | N/A               | N/A               | N/A               | N/A               | N/A               | N/A               | N/A               | 0.08             | 0.11             | 0.16             | 0.19             | 0.14             | 0.19             | 0.08             | 0.11             |



**Table S8.** Comparison of the experimental  $^{13}\text{C}$  NMR data of all carbons of **5** with the mPW1PW91/6-311+G(2d,p) SMD/ $\text{CDCl}_3$  // B3LYP/6-31+G(d,p) ones of the 1: (4*R*,6*R*,7*S*,8*S*,9*R*,10*R*,11*S*)-**5**, 2: (4*R*,6*R*,7*S*,8*S*,9*R*,10*R*,11*R*)-**5**, 3: (4*R*,6*R*,7*S*,8*R*,9*R*,10*R*,11*S*)-**5**, 4: (4*R*,6*R*,7*S*,8*R*,9*R*,10*R*,11*R*)-**5**, 5: (4*R*,6*R*,7*S*,8*R*,9*S*,10*R*,11*S*)-**5**, 6: (4*R*,6*R*,7*S*,8*R*,9*S*,10*R*,11*R*)-**5**, 7: (4*R*,6*R*,7*S*,8*S*,9*S*,10*R*,11*S*)-**5** and the 8: (4*R*,6*R*,7*S*,8*S*,9*S*,10*R*,11*R*)-**5** stereoisomers. For better comparison,  $\Delta\delta$  values over 2.5 were highlighted with yellow and those over 5.0 with red.

| Numbering | Exp  | Calc <sub>1</sub> | Calc <sub>2</sub> | Calc <sub>3</sub> | Calc <sub>4</sub> | Calc <sub>5</sub> | Calc <sub>6</sub> | Calc <sub>7</sub> | Calc <sub>8</sub> | $\Delta\delta_1$ | $\Delta\delta_2$ | $\Delta\delta_3$ | $\Delta\delta_4$ | $\Delta\delta_5$ | $\Delta\delta_6$ | $\Delta\delta_7$ | $\Delta\delta_8$ |
|-----------|------|-------------------|-------------------|-------------------|-------------------|-------------------|-------------------|-------------------|-------------------|------------------|------------------|------------------|------------------|------------------|------------------|------------------|------------------|
| H-2       | 6.58 | 6.62              | 6.61              | 6.52              | 6.50              | 6.55              | 6.62              | 6.49              | 6.55              | 0.04             | 0.03             | 0.06             | 0.08             | 0.03             | 0.04             | 0.09             | 0.03             |
| H-3       | 5.97 | 6.12              | 6.15              | 6.15              | 6.23              | 6.17              | 6.27              | 6.02              | 6.02              | 0.15             | 0.18             | 0.18             | 0.26             | 0.20             | 0.30             | 0.05             | 0.05             |
| H-4       | 3.09 | 3.16              | 3.15              | 3.51              | 3.45              | 3.36              | 3.36              | 3.25              | 3.28              | 0.07             | 0.06             | 0.42             | 0.36             | 0.27             | 0.27             | 0.16             | 0.19             |
| H-5a      | 1.79 | 1.67              | 1.55              | 1.55              | 1.69              | 1.78              | 1.81              | 1.65              | 1.58              | 0.12             | 0.24             | 0.24             | 0.10             | 0.01             | 0.02             | 0.14             | 0.21             |
| H-5b      | 1.63 | 1.63              | 1.88              | 1.67              | 1.96              | 1.70              | 1.80              | 1.63              | 1.86              | 0.00             | 0.25             | 0.04             | 0.33             | 0.07             | 0.17             | 0.00             | 0.23             |
| H-6       | 4.56 | 4.25              | 4.21              | 4.16              | 4.00              | 3.96              | 3.92              | 4.69              | 4.66              | 0.31             | 0.35             | 0.40             | 0.56             | 0.60             | 0.64             | 0.13             | 0.10             |
| H-7       | 2.23 | 2.27              | 2.16              | 2.54              | 2.38              | 2.22              | 2.17              | 2.50              | 2.44              | 0.04             | 0.07             | 0.31             | 0.15             | 0.01             | 0.06             | 0.27             | 0.21             |
| H-8       | 5.57 | 5.38              | 5.38              | 4.96              | 5.06              | 5.00              | 5.00              | 5.41              | 5.43              | 0.19             | 0.19             | 0.61             | 0.51             | 0.57             | 0.57             | 0.16             | 0.14             |
| H-9       | 5.57 | 5.49              | 5.49              | 5.15              | 5.08              | 5.01              | 4.24              | 5.42              | 5.30              | 0.08             | 0.08             | 0.42             | 0.49             | 0.56             | 1.33             | 0.15             | 0.27             |
| H-11      | 3.04 | 3.02              | 2.54              | 3.01              | 2.52              | 2.92              | 2.95              | 3.01              | 2.17              | 0.02             | 0.50             | 0.03             | 0.52             | 0.12             | 0.09             | 0.03             | 0.87             |
| H-13a     | 3.68 | 3.44              | 3.51              | 3.28              | 3.57              | 3.73              | 3.67              | 3.46              | 3.47              | 0.24             | 0.17             | 0.40             | 0.11             | 0.05             | 0.01             | 0.22             | 0.21             |
| H-13b     | 3.34 | 3.33              | 3.38              | 3.27              | 3.45              | 3.53              | 3.48              | 2.95              | 3.36              | 0.01             | 0.04             | 0.07             | 0.11             | 0.19             | 0.14             | 0.39             | 0.02             |
| H-14 (3x) | 1.31 | 1.26              | 1.24              | 1.32              | 1.49              | 1.45              | 1.55              | 1.34              | 1.32              | 0.05             | 0.07             | 0.01             | 0.18             | 0.14             | 0.24             | 0.03             | 0.01             |
| H-15 (3x) | 1.15 | 1.08              | 1.05              | 1.09              | 1.07              | 1.13              | 1.08              | 1.08              | 1.07              | 0.07             | 0.10             | 0.06             | 0.08             | 0.02             | 0.07             | 0.07             | 0.08             |
| OMe (3x)  | 3.39 | 3.13              | 3.34              | 3.27              | 3.34              | 3.48              | 3.37              | 3.20              | 3.16              | 0.26             | 0.05             | 0.12             | 0.05             | 0.09             | 0.02             | 0.19             | 0.23             |
| H-2a'     | 2.00 | 2.12              | 2.18              | 2.37              | 2.24              | 2.04              | 2.12              | 2.00              | 2.08              | 0.12             | 0.18             | 0.37             | 0.24             | 0.04             | 0.12             | 0.00             | 0.08             |
| H-2b'     | 2.00 | 2.00              | 2.04              | 2.24              | 2.19              | 2.14              | 2.22              | 2.08              | 2.11              | 0.00             | 0.04             | 0.24             | 0.19             | 0.14             | 0.22             | 0.08             | 0.11             |
| H-3'      | 2.07 | 1.97              | 1.98              | 2.11              | 2.10              | 1.99              | 2.04              | 1.99              | 1.98              | 0.10             | 0.09             | 0.04             | 0.03             | 0.08             | 0.03             | 0.08             | 0.09             |
| H-4' (3x) | 0.91 | 0.91              | 0.87              | 0.97              | 0.91              | 0.87              | 0.88              | 0.89              | 0.89              | 0.00             | 0.04             | 0.06             | 0.00             | 0.04             | 0.03             | 0.02             | 0.02             |
| H-5' (3x) | 0.89 | 0.85              | 0.84              | 0.96              | 0.90              | 0.86              | 0.87              | 0.85              | 0.84              | 0.04             | 0.05             | 0.07             | 0.01             | 0.03             | 0.02             | 0.04             | 0.05             |
| OAc (3x)  | 2.11 | 2.06              | 2.05              | 2.04              | 2.08              | 2.04              | 2.06              | 2.13              | 2.13              | 0.05             | 0.06             | 0.07             | 0.03             | 0.07             | 0.05             | 0.02             | 0.02             |
| CMAE      | N/A  | N/A               | N/A               | N/A               | N/A               | N/A               | N/A               | N/A               | N/A               | 0.08             | 0.12             | 0.16             | 0.17             | 0.13             | 0.18             | 0.09             | 0.12             |

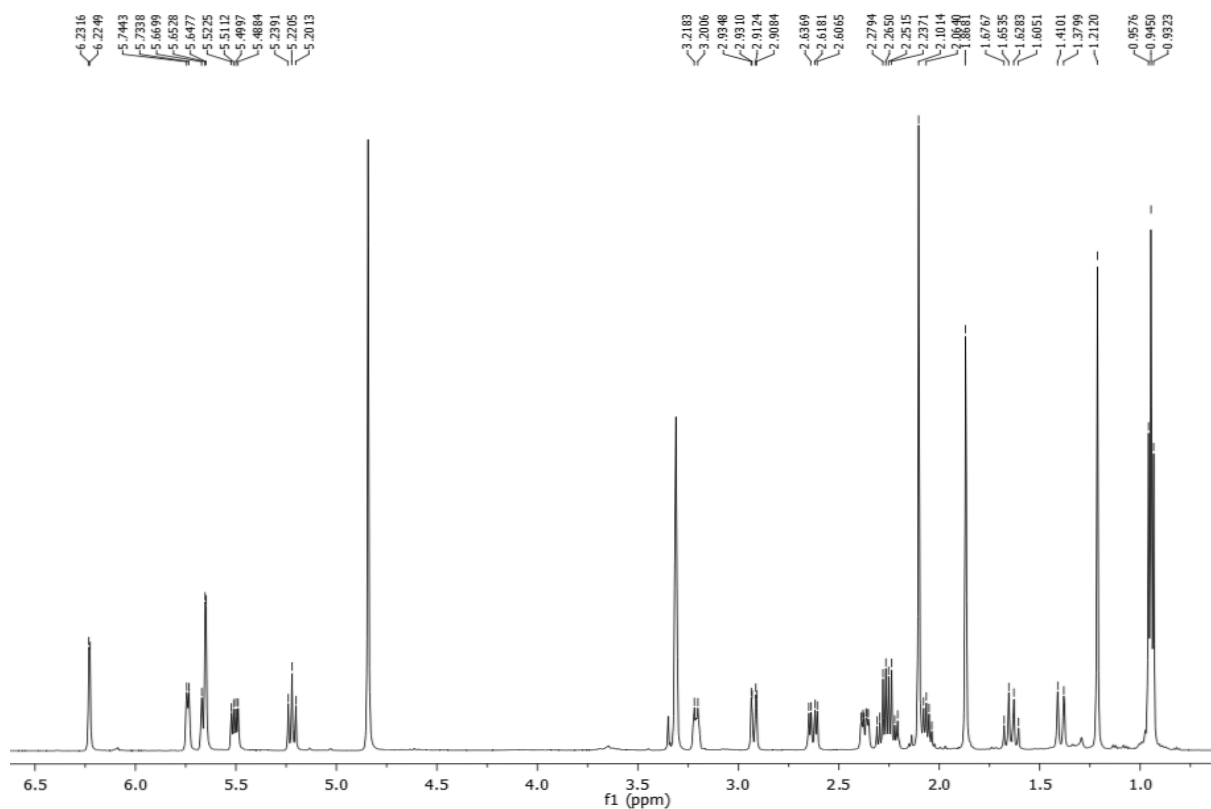

Figure S30.  $^1\text{H}$  NMR spectrum of **6**

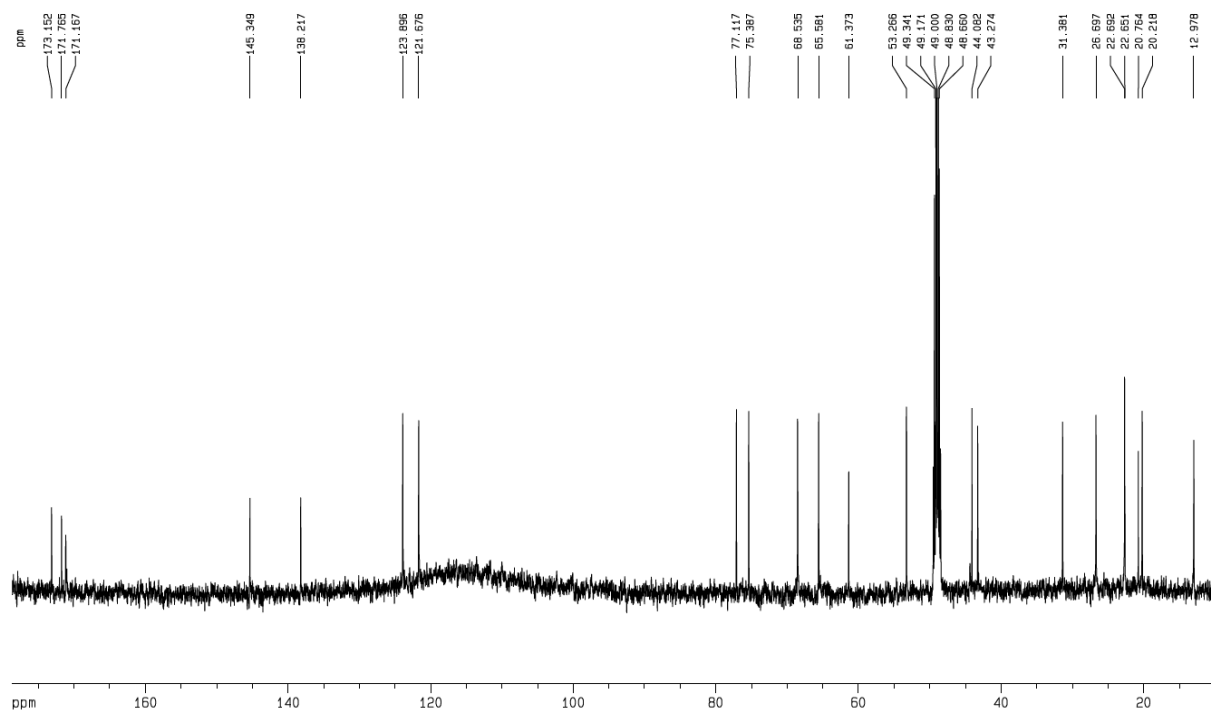

**Figure S31.**  $^{13}\text{C}$  NMR spectrum of **6**

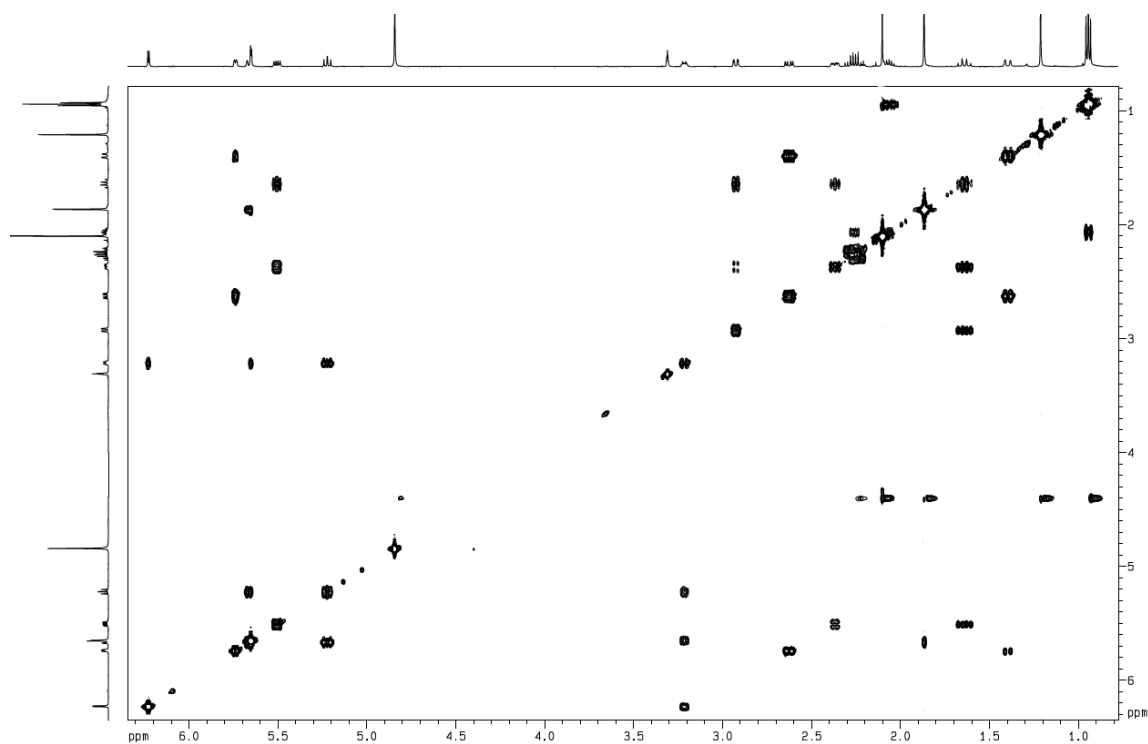

**Figure S32.**  $^1\text{H}$ - $^1\text{H}$  COSY spectrum of **6**

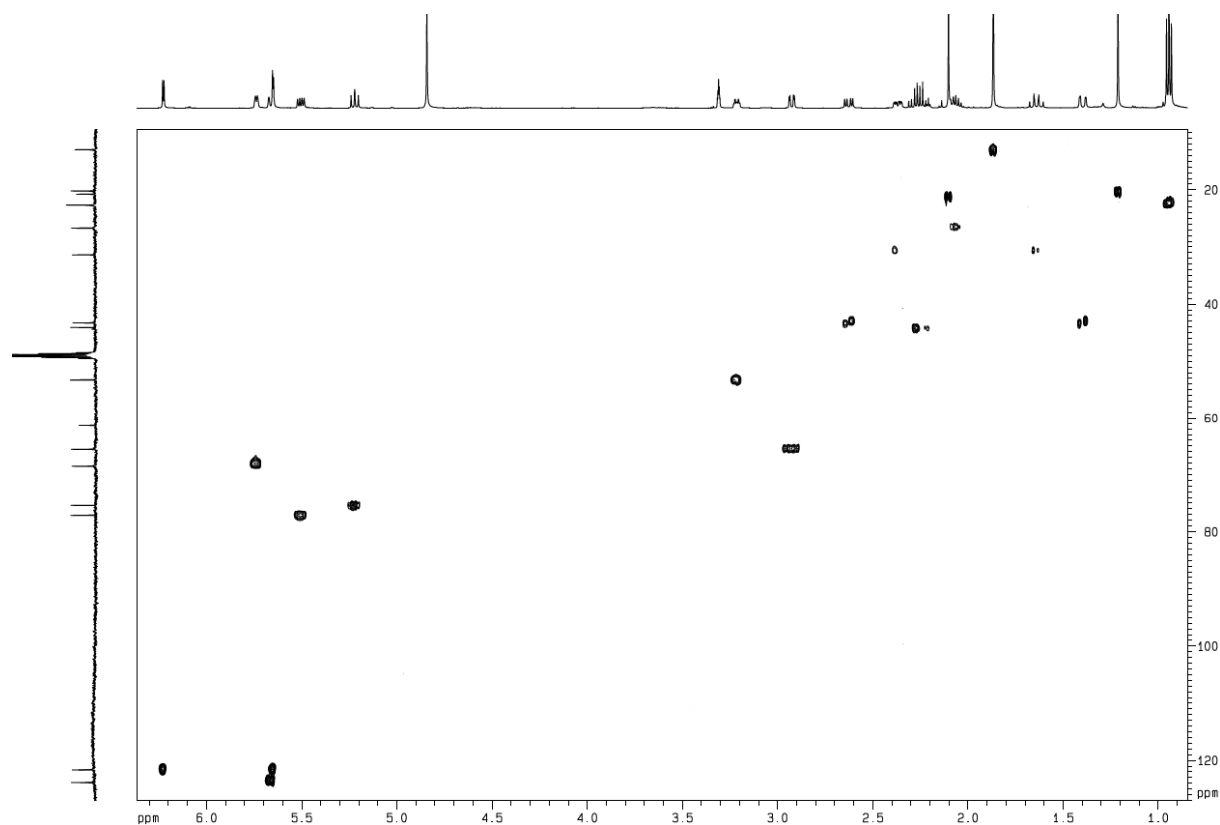

Figure S33. HSQC spectrum of 6

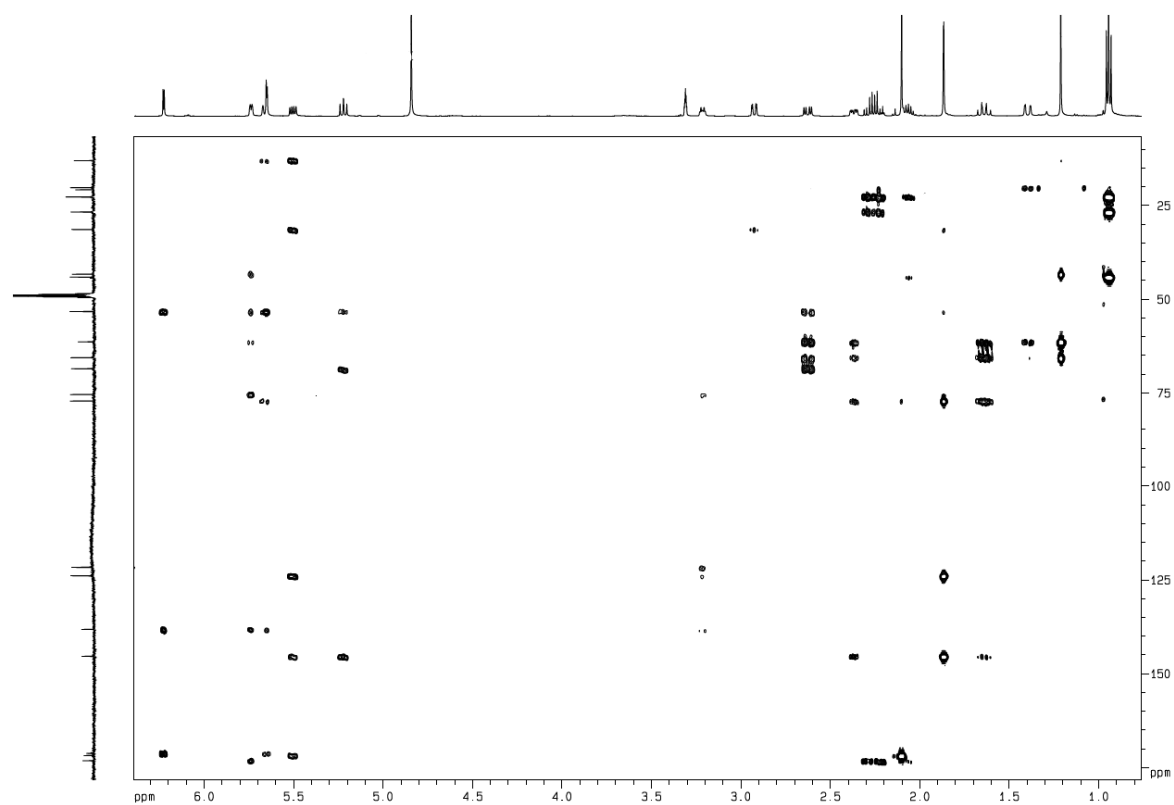

Figure S34. HMBC spectrum of 6

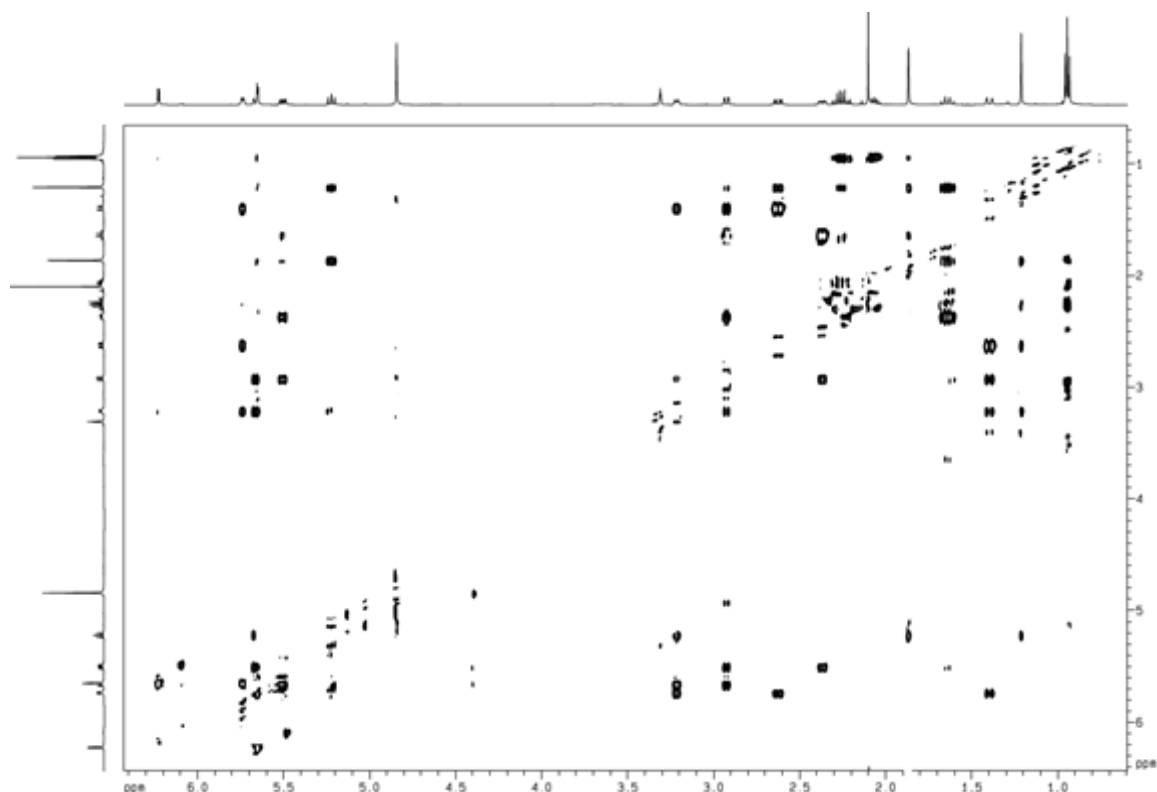

**Figure S35.** NOESY spectrum of **6**

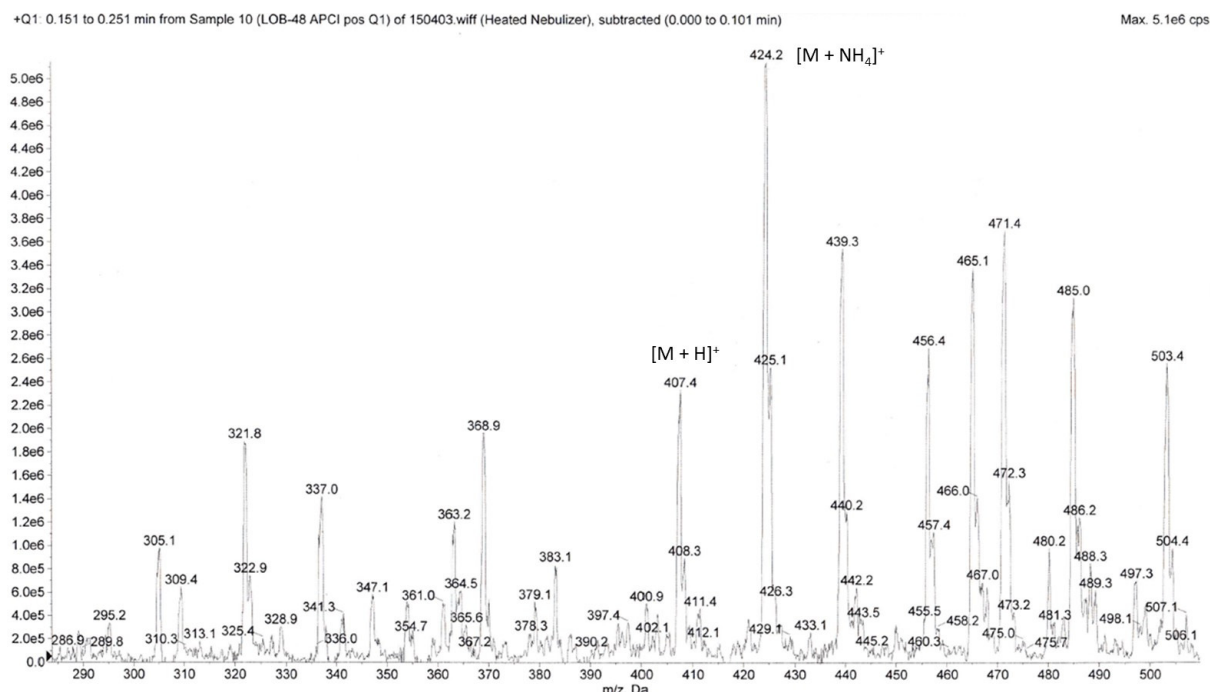

**Figure S36.** HRMS spectrum of **6**



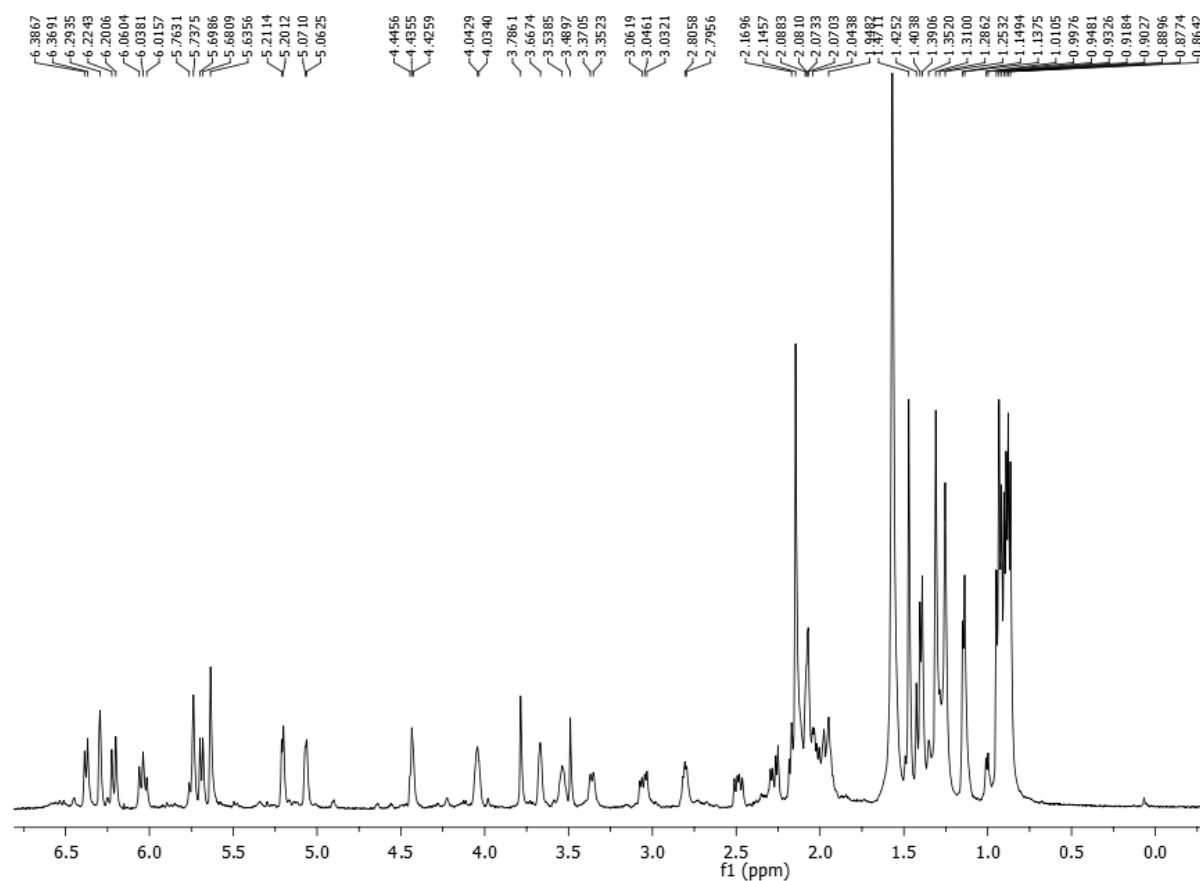

**Figure S37.**  $^1\text{H}$  NMR spectrum of **7**

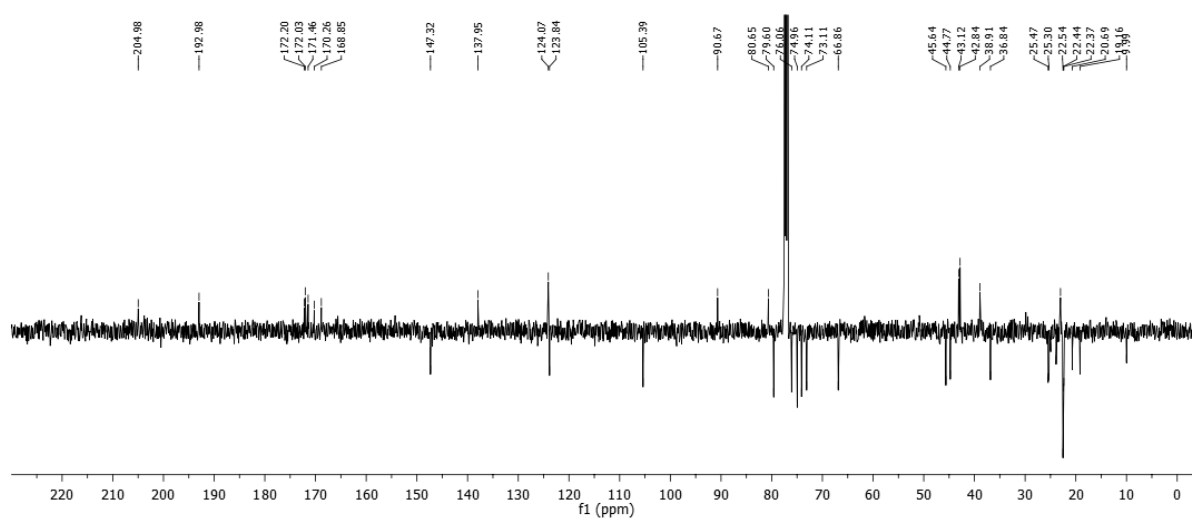

**Figure S38.** JMOD spectrum of **7**

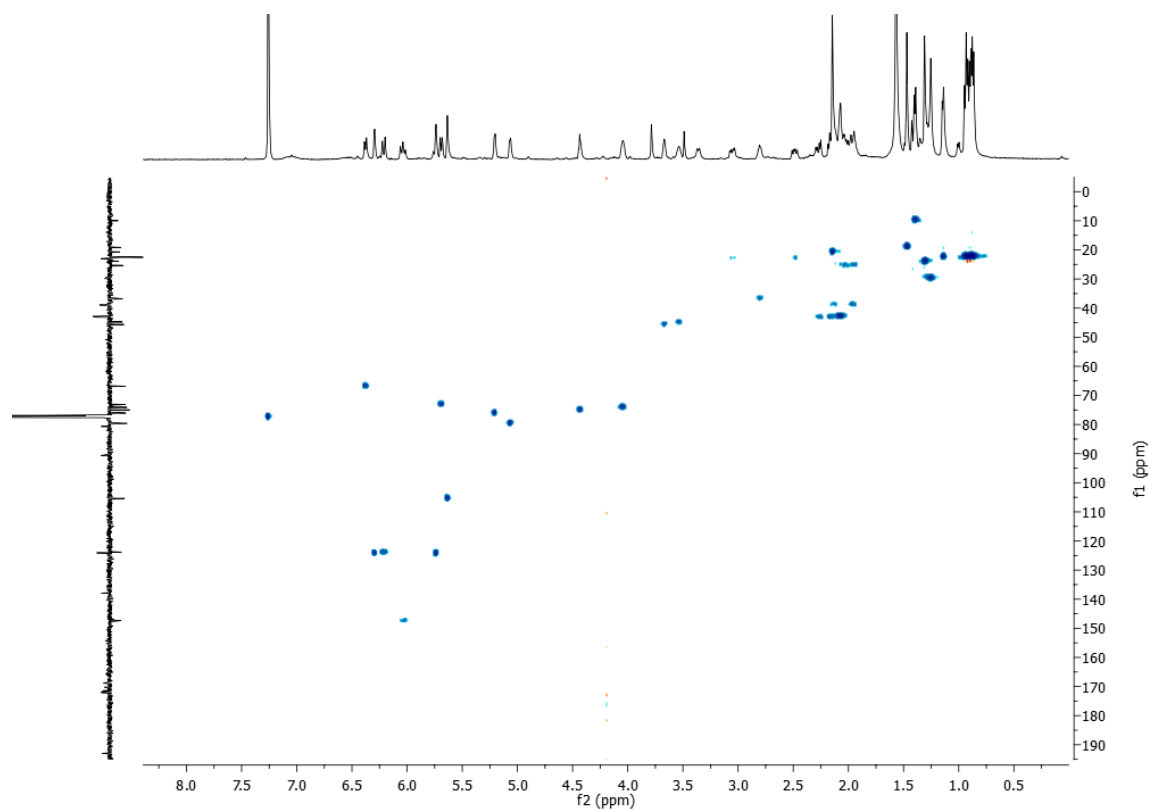

Figure S39. HSQC spectrum of 7

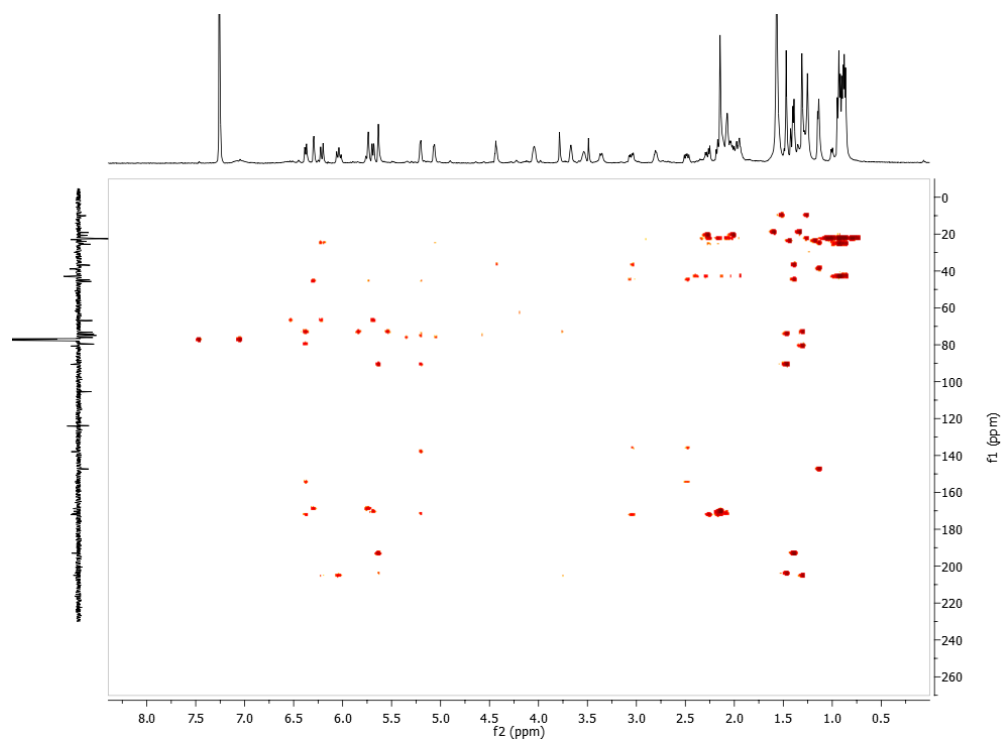

Figure S40. HMBC spectrum of 7

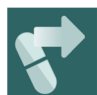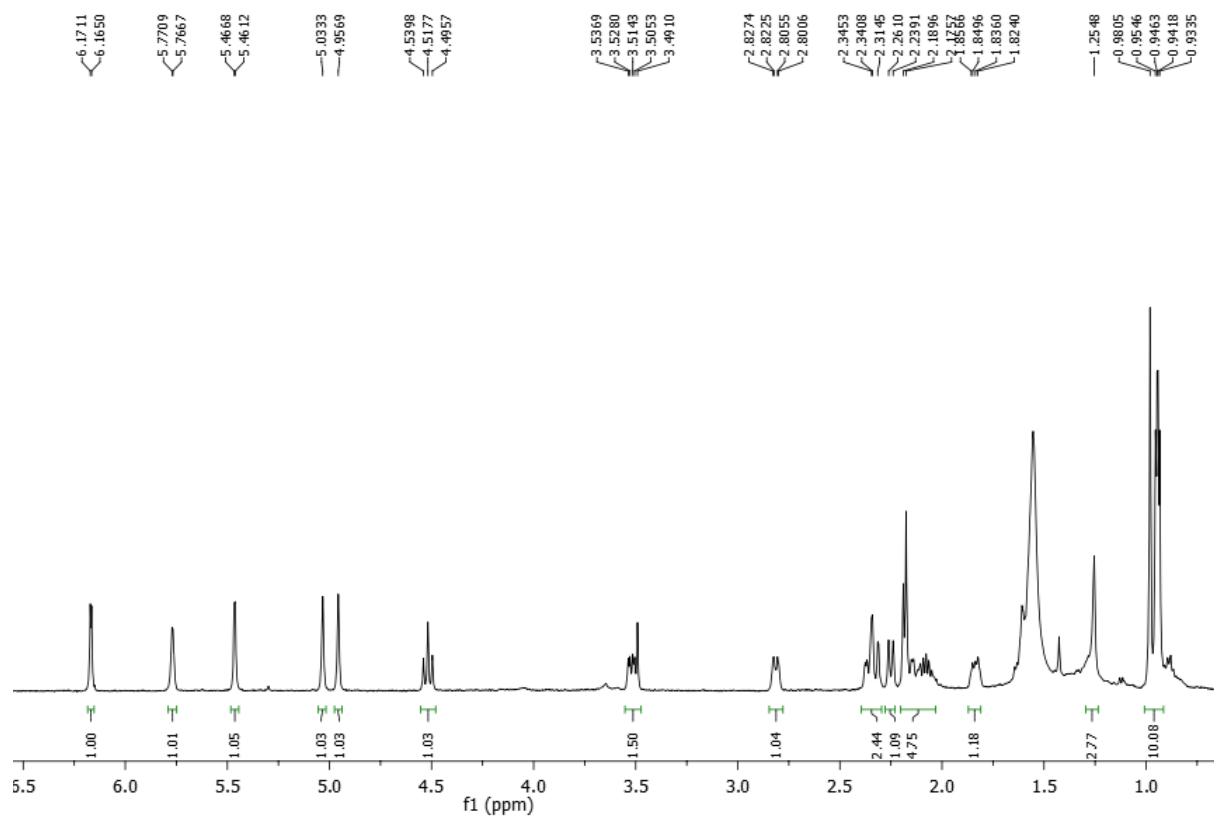

Figure S41.  $^1\text{H}$  NMR spectrum of 8

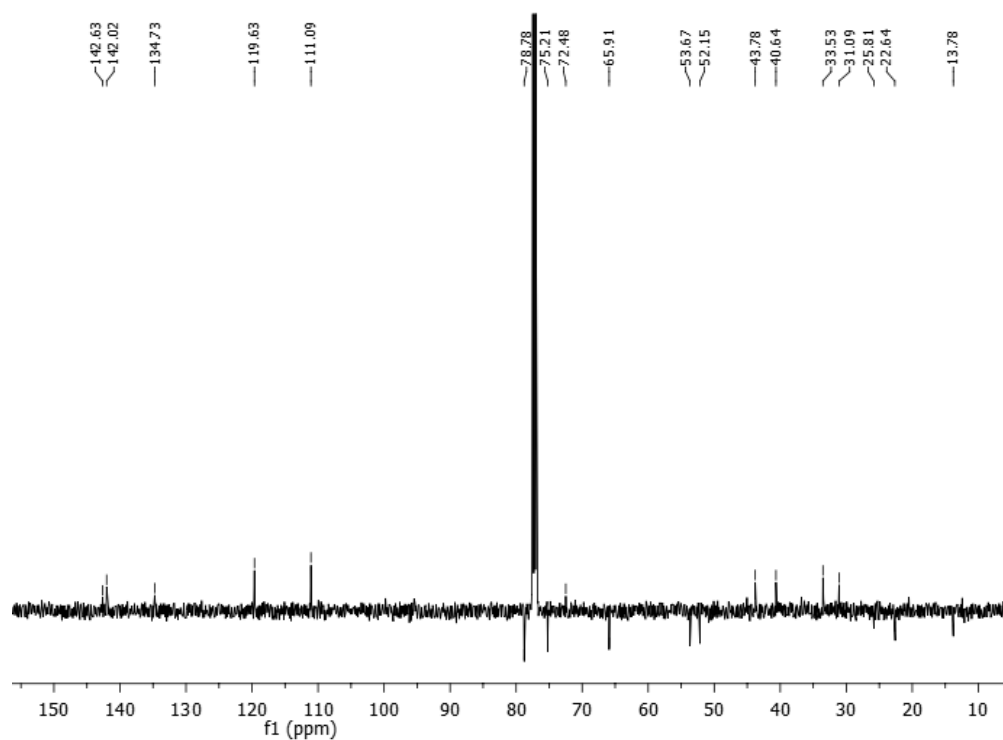

**Figure S42.** JMOD spectrum of **8**

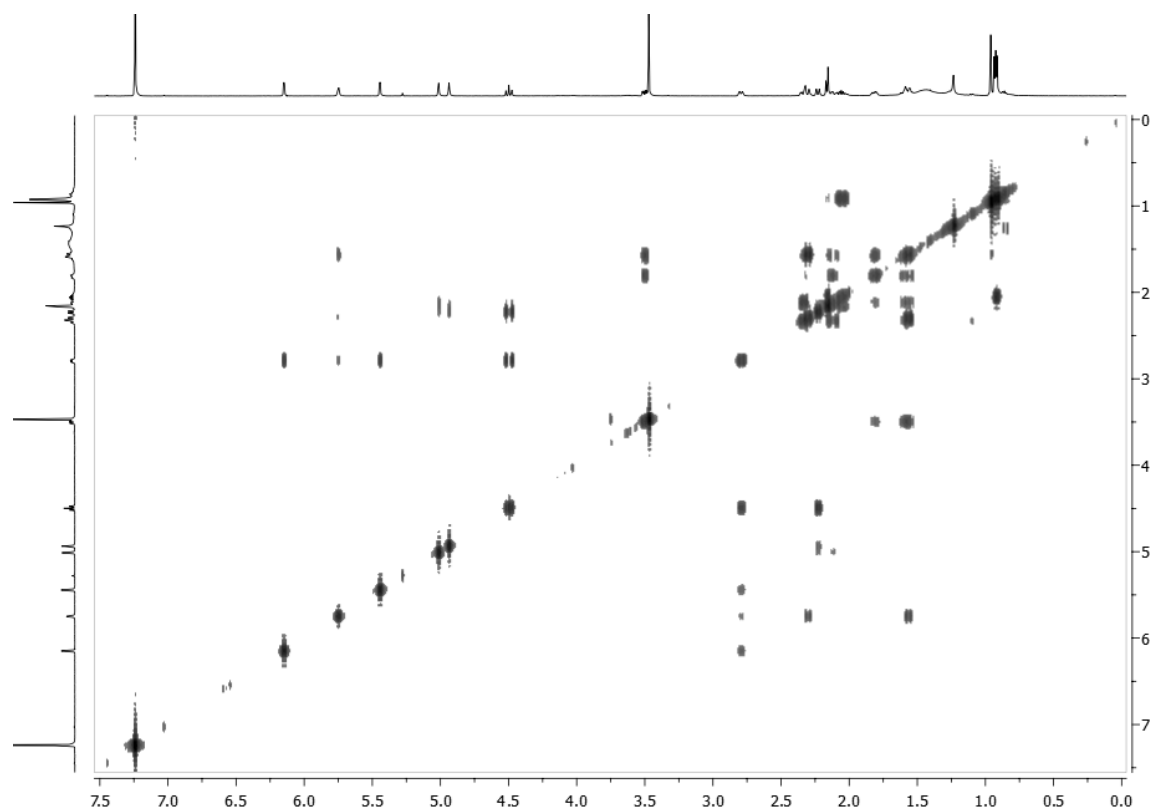

**Figure S43.**  $^1\text{H}$ - $^1\text{H}$  COSY spectrum of **8**

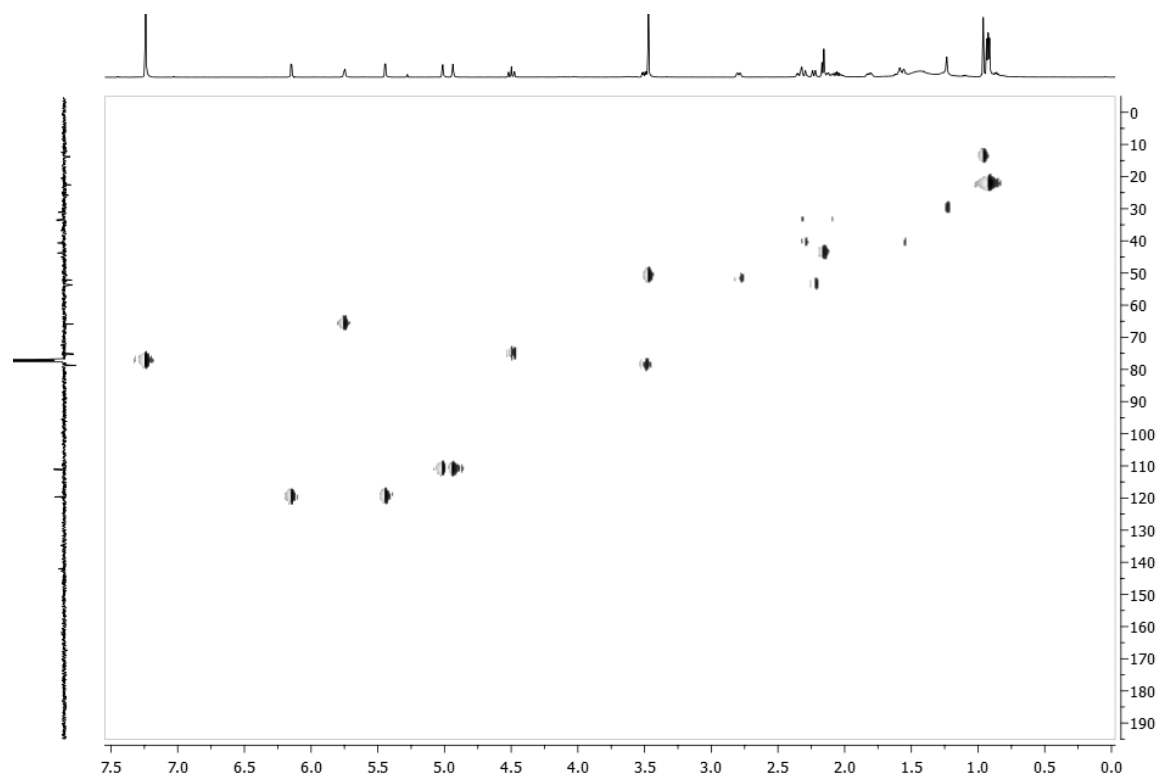

Figure S44. HSQC spectrum of 8

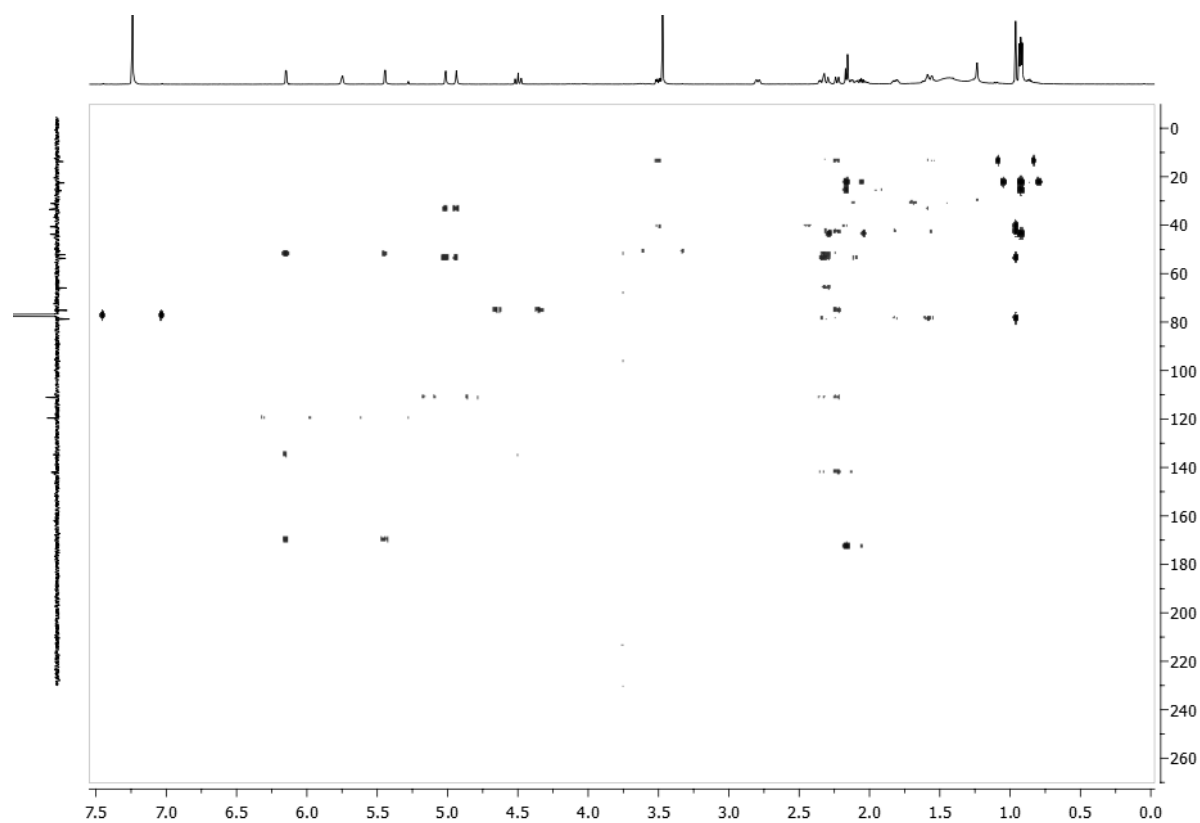

**Figure S45.** HMBC spectrum of **8**

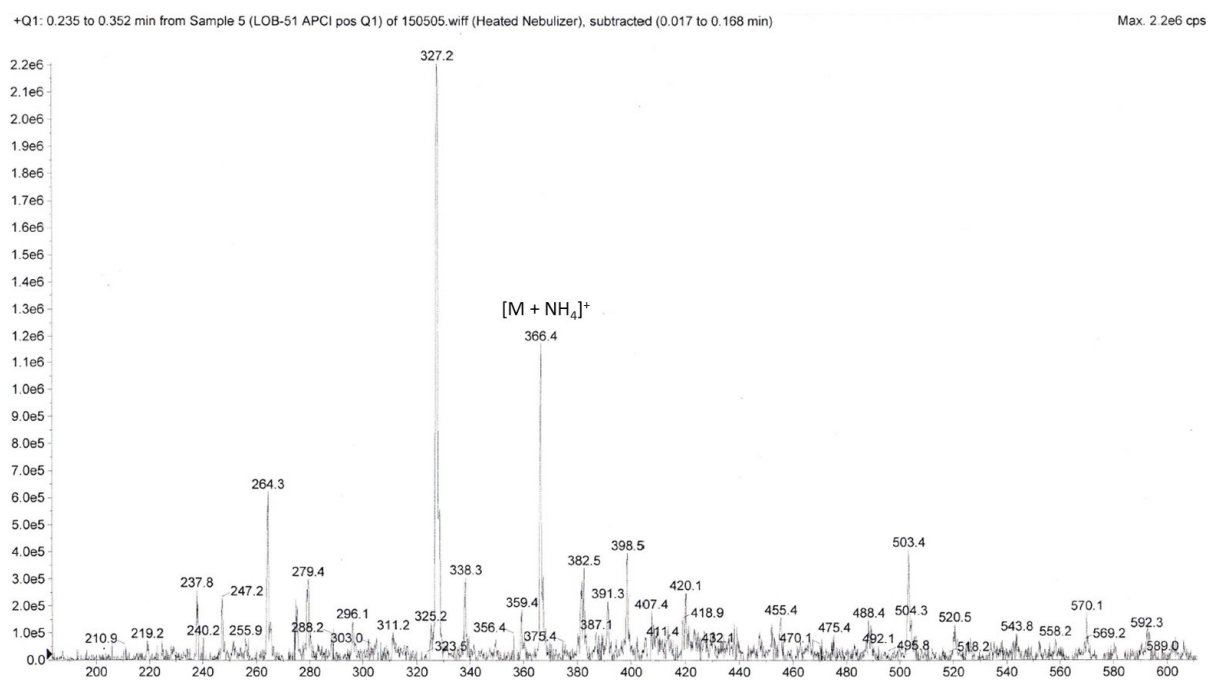

**Figure S46.** HRMS spectrum of **8**

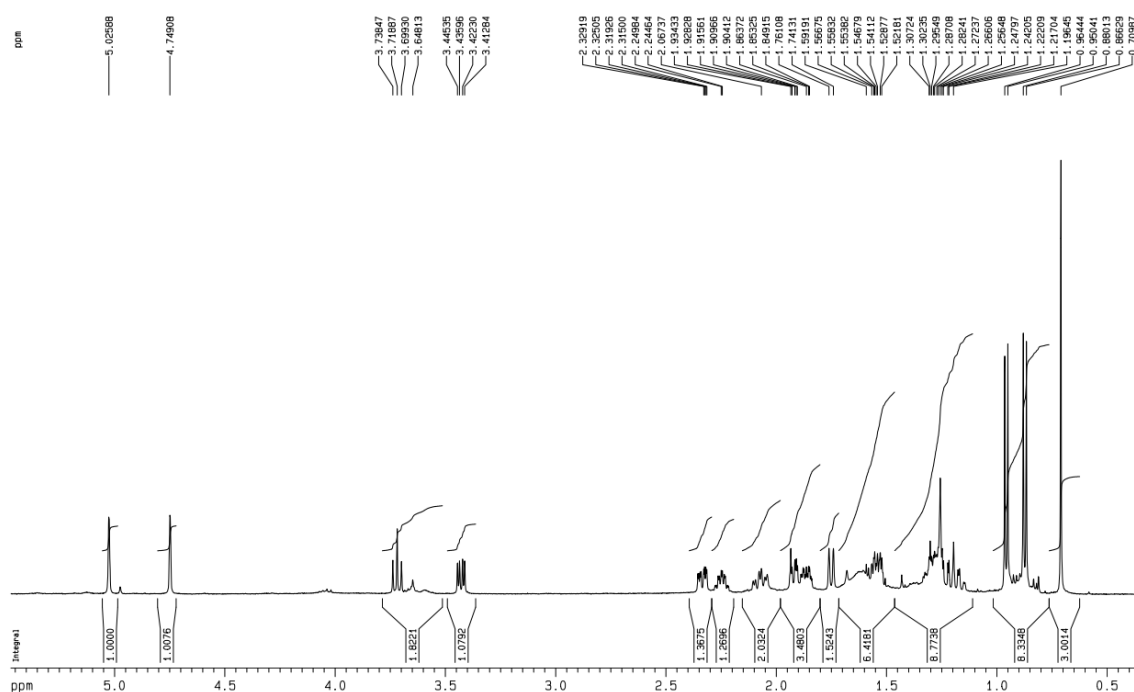

**Figure S47.**  $^1\text{H}$  NMR spectrum of **9**

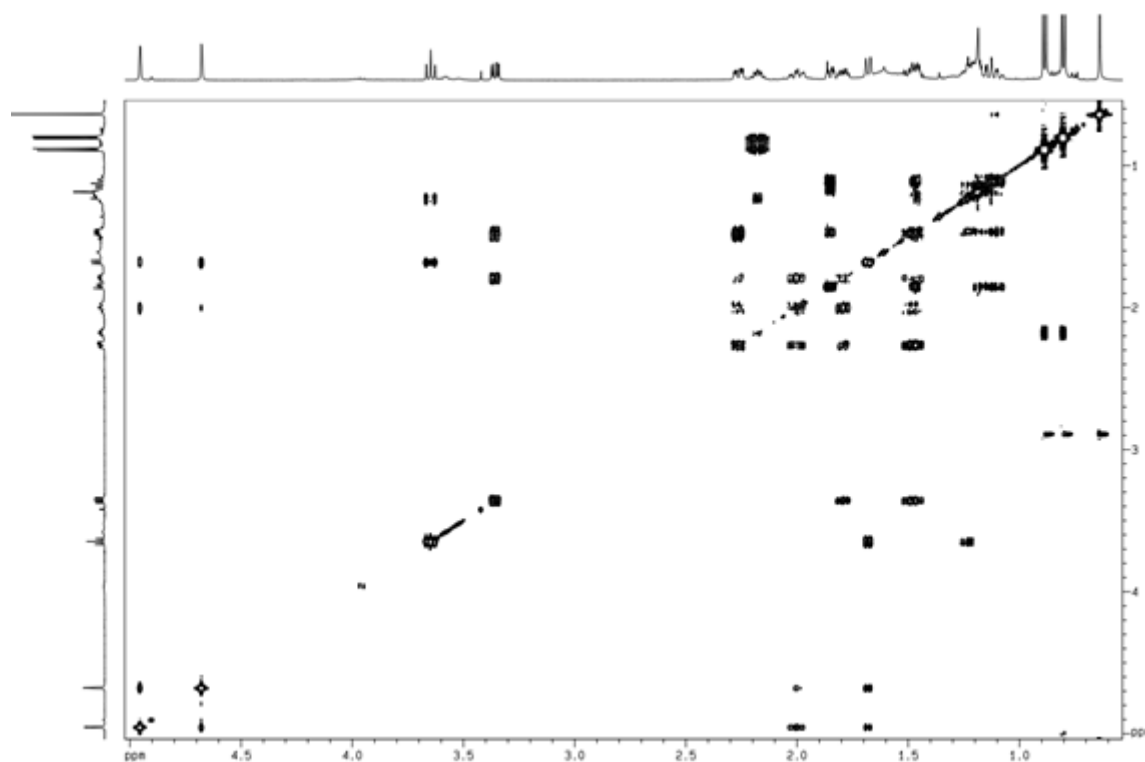

Figure S48.  $^1\text{H}$ - $^1\text{H}$  COSY spectrum of 9

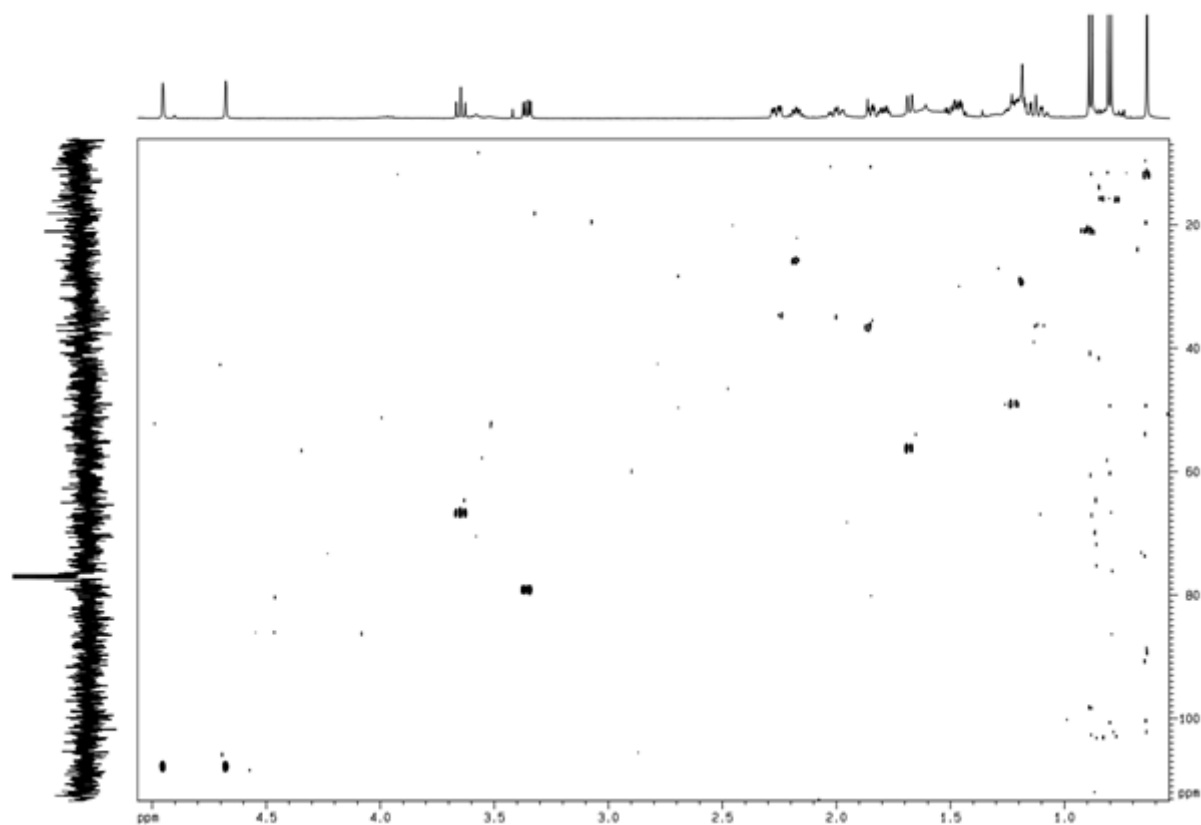

**Figure S49.** HSQC spectrum of **9**

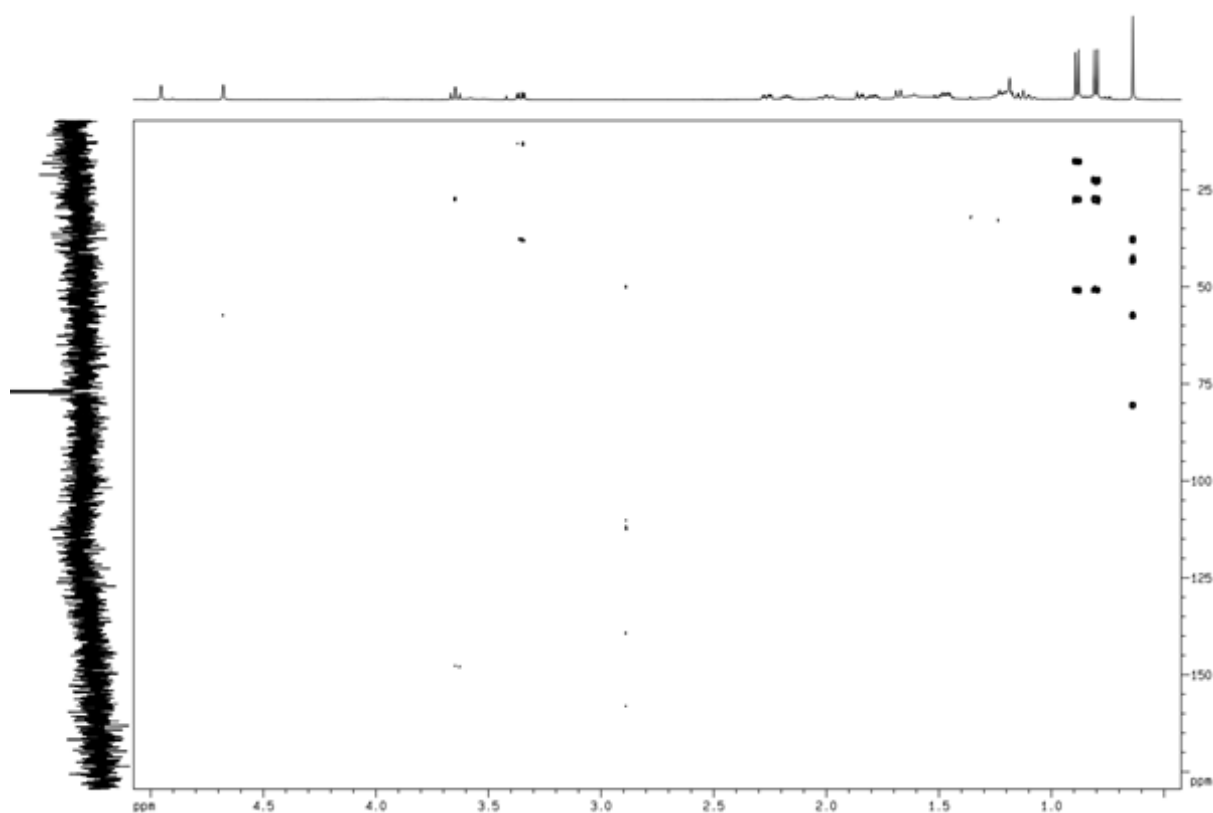



Figure S50. HMBC spectrum of **9**

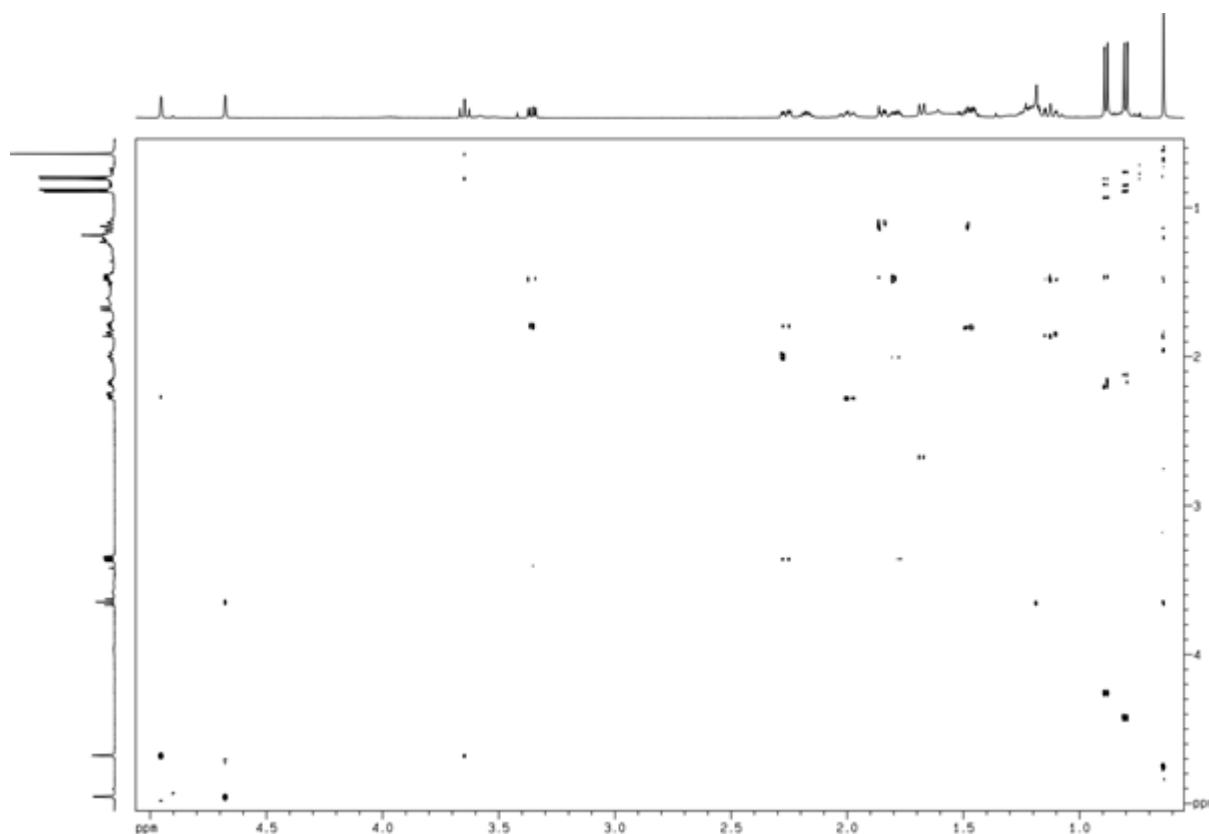

Figure S51. NOESY spectrum of **9**

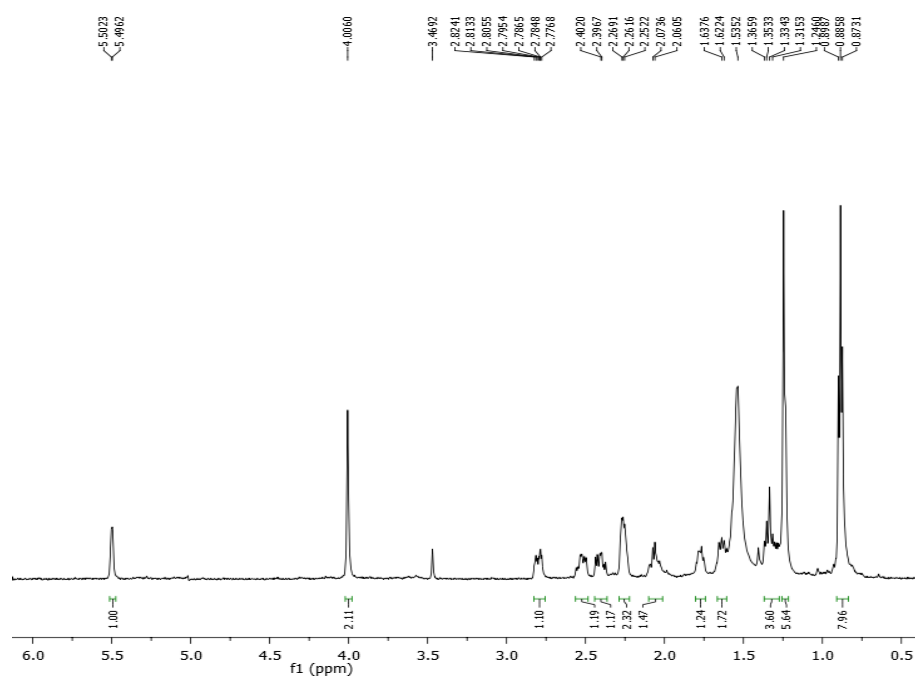

**Figure S52.**  $^1\text{H}$  NMR spectrum of **10**

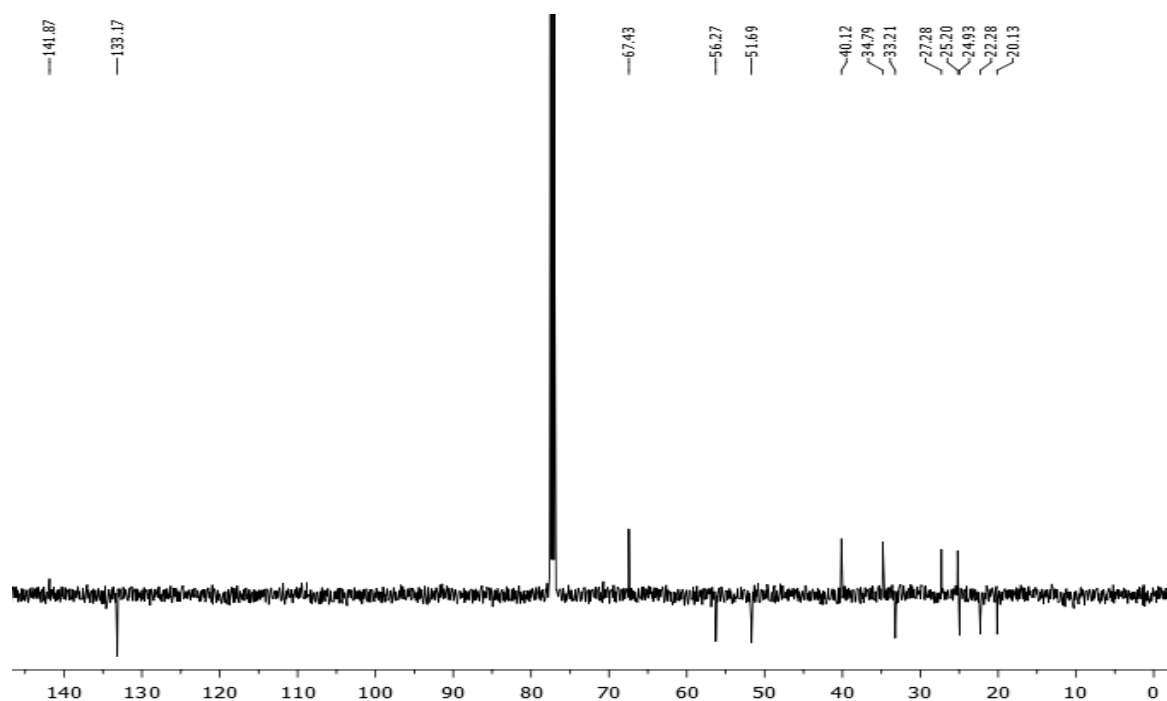

**Figure S53.** JMOD spectrum of **10**

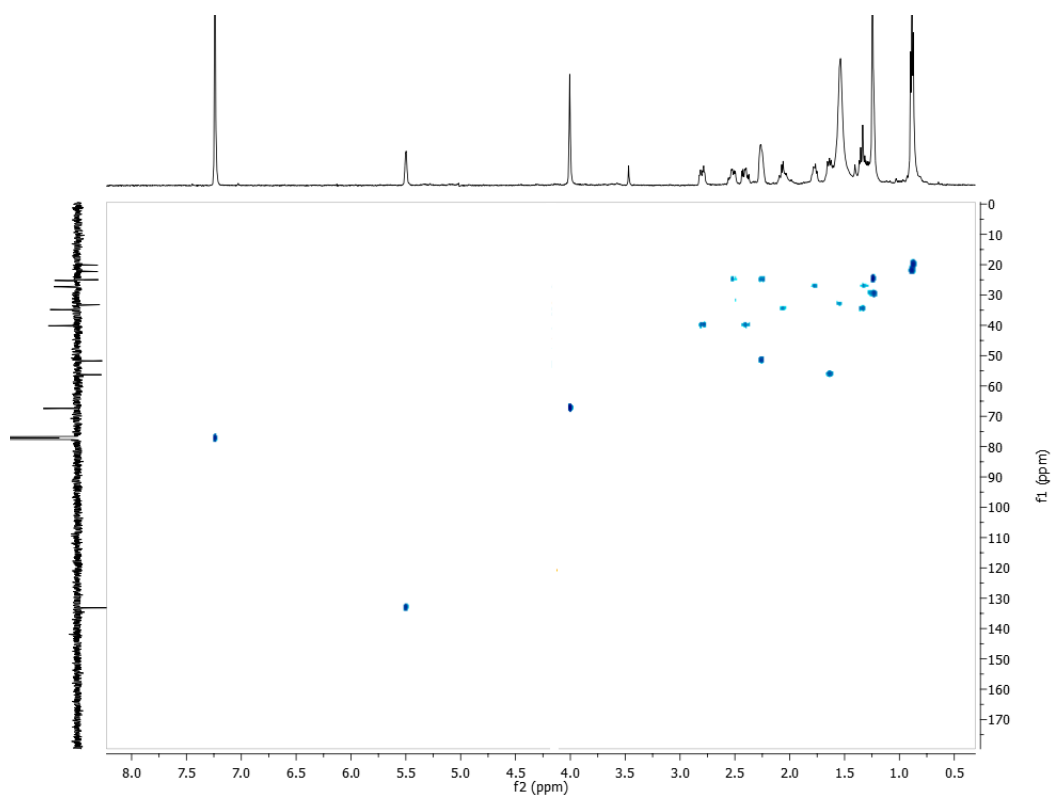

**Figure S54.** HSQC spectrum of **10**

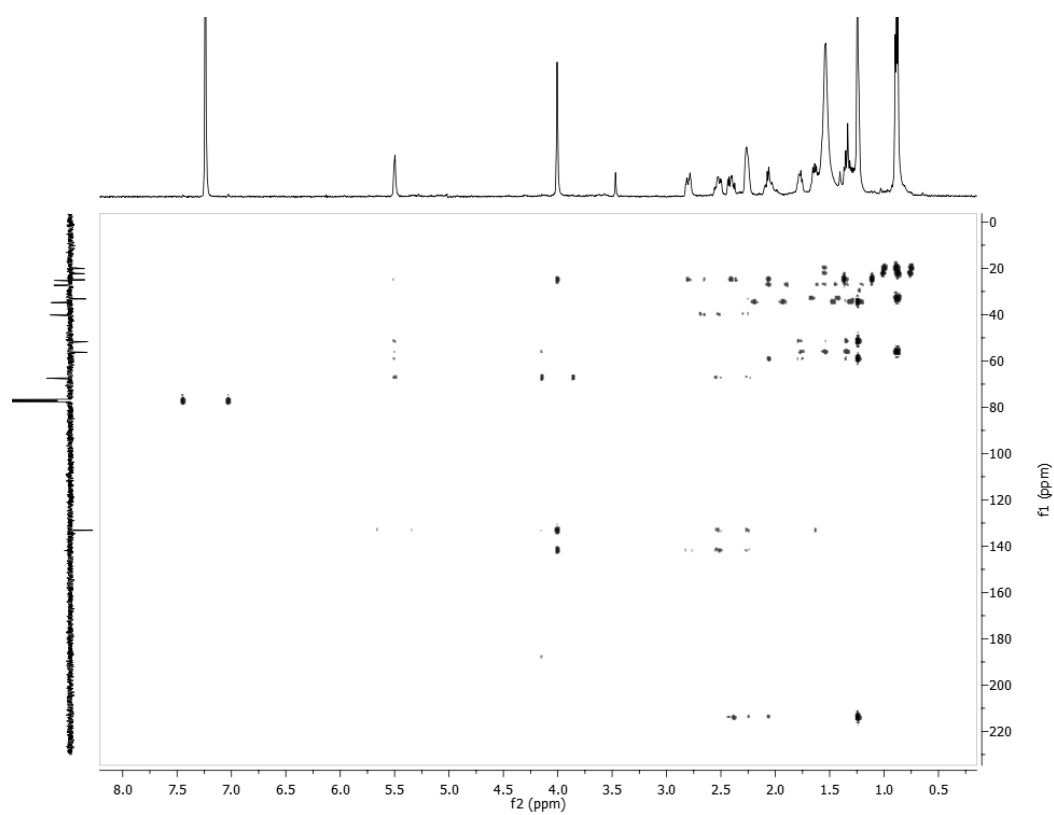

**Figure S55.** HMBC spectrum of **10**
